# Supplementary material for: Arthrinins E–G, Three Botryane Sesquiterpenoids from the Plant Endophytic Fungus Arthrinium sp. HS66
Source: PubMed Central journal article supplement (PMC7367987; doi:10.1007/s13659-020-00248-y), 2020-07-12
Supplement: 13659_2020_248_MOESM1_ESM.pdf [file 13659_2020_248_MOESM1_ESM.pdf]

## Supporting Information for

### **Arthrinins E–G, three botryane sesquiterpenoids from the plant endophytic fungus *Arthrinium* sp. HS66**

Xiao-Zheng Su,<sup>a,b,c</sup> Jian-Wei Tang,<sup>a,b</sup> Kun Hu,<sup>a,b</sup> Xiao-Nian Li,<sup>a,b</sup> Han-Dong Sun,<sup>a,b</sup> Pema-Tenzin Puno<sup>\*a,b</sup>

<sup>a</sup> State Key Laboratory of Phytochemistry and Plant Resources in West China, Kunming Institute of Botany, Chinese Academy of Sciences, Kunming 650201, People's Republic of China

<sup>b</sup> Yunnan Key Laboratory of Natural Medicinal Chemistry, Kunming Institute of Botany, Chinese Academy of Sciences, Kunming 650201, People's Republic of China

<sup>c</sup> University of Chinese Academy of Sciences, Beijing 100049, People's Republic of China

---

\* Corresponding author Tel.: (86) 871-65223616  
E-mail: [punopematenzin@mail.kib.ac.cn](mailto:punopematenzin@mail.kib.ac.cn).

## Contents of Supporting Information

| <b>Contents</b>                                                             | <b>Pages</b> |
|-----------------------------------------------------------------------------|--------------|
| Experimental details                                                        | 3            |
| Figure S1. X-ray structure of <b>1</b>                                      | 3            |
| Table S20-27. X-ray crystal detailed data of <b>1</b>                       | 48-52        |
| Figure S2. Cytotoxicity results of <b>1-3</b>                               | 3            |
| Table S1-19. Computational data of <b>2</b> and <b>3</b>                    | 3-6, 32-47   |
| Figure S3-6. Computational data of <b>2</b> and <b>3</b>                    | 5-7          |
| Figure S7-39. 1D, 2D NMR, HRESIMS, ESI, IR, UV and CD spectra of <b>1-3</b> | 8-31         |

## Experimental details

### 1. X-ray Crystal Structure Analysis

The intensity data for arthrinin E (**1**) were collected on a Bruker APEX DUO diffractometer using graphite-monochromated Cu K $\alpha$  radiation. The structure of the compound was solved by direct methods (SHELXS97), expanded using difference Fourier techniques, and refined by the program and full-matrix least-squares calculations. The non-hydrogen atoms were refined anisotropically, and hydrogen atoms were fixed at calculated positions. Detailed data were provided in Tables S20-27 in the Supporting Information.

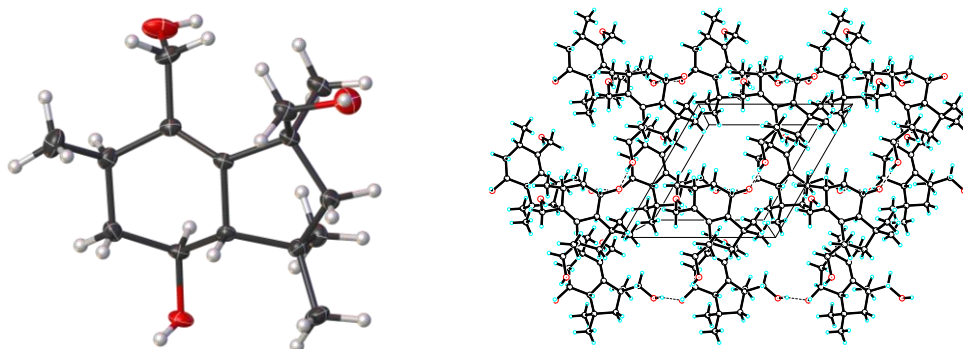

Figure S1. X-ray crystal structure of arthrinin E (**1**).

### 2. Cytotoxicity results

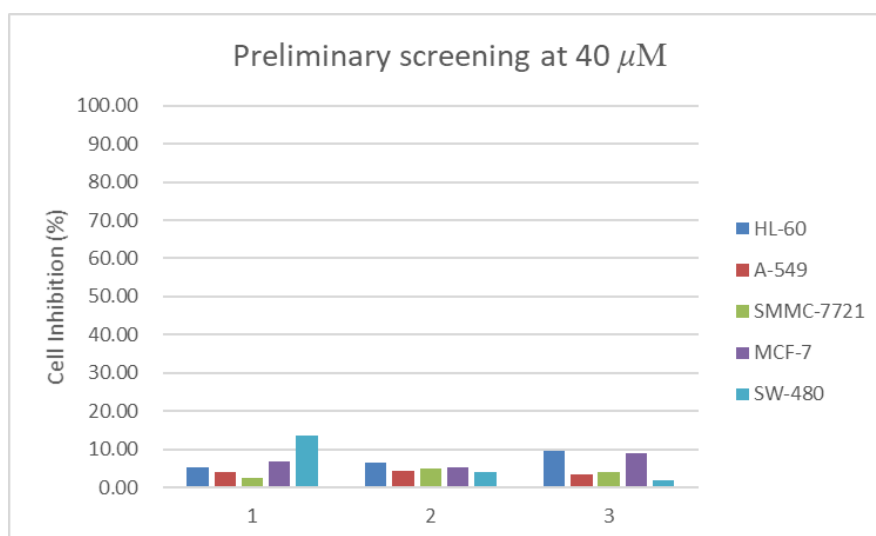

Figure S2. Effects of compounds **1**–**3** on the growth of various cell lines were analyzed by MTS assay.

### 3. Computational data of compounds **2** and **3**

Table S1. Experimental and calculated  $^{13}\text{C}$ -NMR chemical shifts of (1*R*\*, 2*R*\*, 4*S*\*, 5*S*\*)-**2**

| No. | $\delta_{\text{exptl.}}$ | $\delta_{\text{calcd.}}$ |
|-----|--------------------------|--------------------------|
| 1   | 43.5                     | 44.8                     |
| 2   | 33.7                     | 36.0                     |

|    |       |       |
|----|-------|-------|
| 3  | 40.8  | 41.4  |
| 4  | 71.9  | 74.3  |
| 5  | 60.9  | 60.9  |
| 6  | 39.7  | 42.7  |
| 7  | 51.7  | 51.4  |
| 8  | 136.9 | 139.3 |
| 9  | 139.8 | 141.8 |
| 10 | 59.9  | 61.1  |
| 11 | 19.4  | 19.9  |
| 12 | 31.6  | 30.7  |
| 13 | 25.6  | 25.6  |
| 14 | 59.2  | 60.4  |

**Table S2.** Experimental and calculated  $^1\text{H}$ -NMR chemical shifts of ( $1R^*$ ,  $2R^*$ ,  $4S^*$ ,  $5S^*$ )-**2**

| No.       | $\delta_{\text{exptl.}}$ | $\delta_{\text{calcd.}}$ |
|-----------|--------------------------|--------------------------|
| 1         | 2.6                      | 2.56                     |
| 2         | 1.67                     | 1.6                      |
| $3\alpha$ | 1.67                     | 1.44                     |
| $3\beta$  | 1.31                     | 1.18                     |
| 4         | 3.57                     | 3.66                     |
| 5         | 2.3                      | 2.37                     |
| $7\alpha$ | 2.16                     | 2.08                     |
| $7\beta$  | 2.37                     | 2.53                     |
| 10        | 3.45                     | 3.46                     |
| 10        | 3.69                     | 3.66                     |
| 11        | 1.03                     | 0.85                     |
| 12        | 1.23                     | 1.07                     |
| 13        | 1.07                     | 0.89                     |
| 14        | 4.05                     | 4.03                     |

**Table S3.** Experimental and calculated spin-spin coupling constants of ( $1R^*$ ,  $2R^*$ ,  $4S^*$ ,  $5S^*$ )-**2**

| $^3J$                 | H-1/H-10a | H-1/H-10b | H-1/H-2 | H-4/H-3 $\alpha$ | H-4/H-3 $\beta$ | H-4/H-5 |
|-----------------------|-----------|-----------|---------|------------------|-----------------|---------|
| <b>Calculated</b>     | 4.3       | 10.6      | 5.2     | 4.3              | 10.2            | 9.7     |
| <b>Experimental</b>   | 4.4       | 10.2      | 4.4     | 4.5              | 10.8            | 10.8    |
| <b>Absolute error</b> | 0.13      | 0.38      | 0.8     | 0.17             | 0.64            | 1.14    |

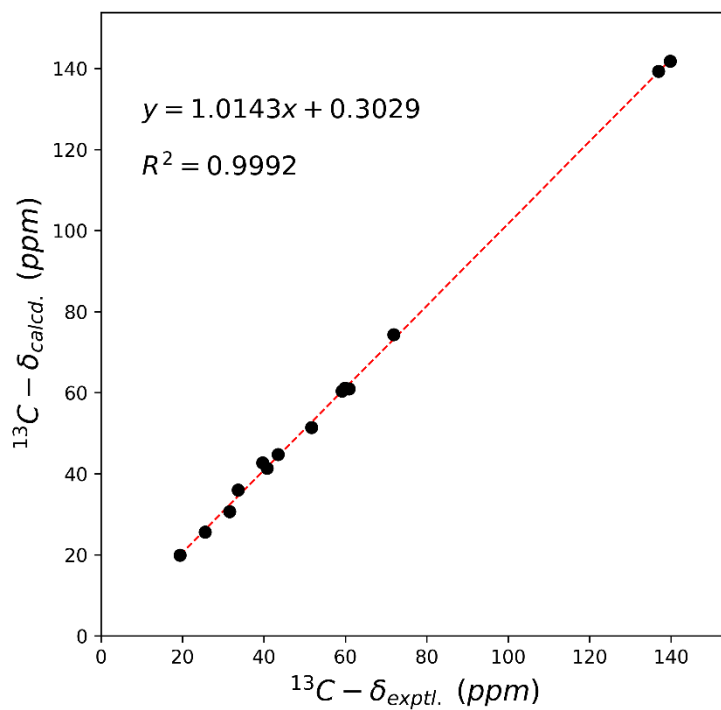

**Figure S3.** Linear regression analysis between experimental and calculated  $^{13}\text{C}$  NMR chemical shifts of ( $1R^*$ ,  $2R^*$ ,  $4S^*$ ,  $5S^*$ )-2.

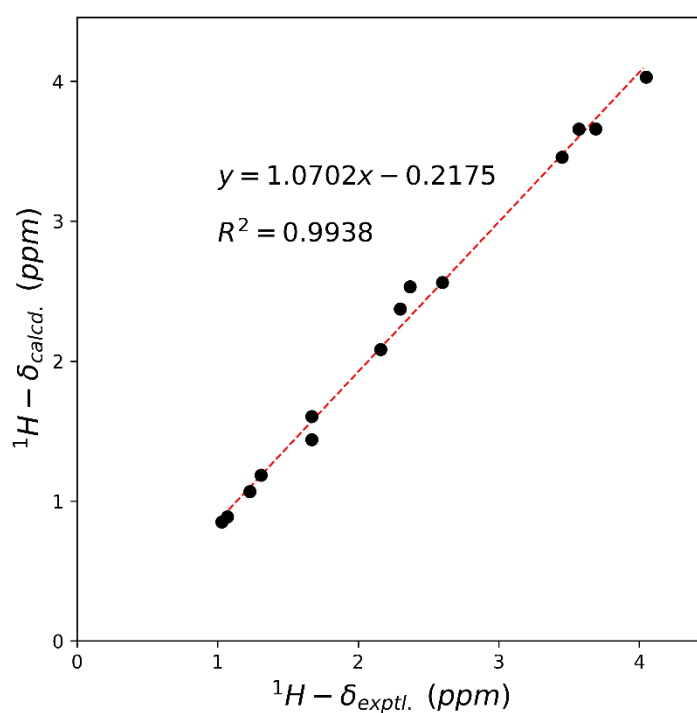

**Figure S4.** Linear regression analysis between experimental and calculated  $^1\text{H}$  NMR chemical shifts of ( $1R^*$ ,  $2R^*$ ,  $4S^*$ ,  $5S^*$ )-2.

**Table S4.** Experimental and calculated  $^{13}\text{C}$ -NMR chemical shifts of (6*R*\*, 8*S*\*)-3

| No. | $\delta_{\text{exptl.}}$ | $\delta_{\text{calcd.}}$ |
|-----|--------------------------|--------------------------|
| 1   | 145.2                    | 144.9                    |
| 2   | 126.0                    | 122.7                    |
| 3   | 125.4                    | 124.7                    |
| 4   | 126.1                    | 123.7                    |
| 5   | 157.8                    | 158.0                    |
| 6   | 50.1                     | 54.3                     |
| 7   | 47.8                     | 47.6                     |
| 8   | 50.2                     | 53.7                     |
| 9   | 144.7                    | 142.8                    |
| 10  | 71.1                     | 72.2                     |
| 11  | 173.9                    | 173.1                    |
| 12  | 71.3                     | 73.2                     |
| 13  | 27.1                     | 28.0                     |
| 14  | 24.9                     | 25.4                     |
| 15  | 70.8                     | 70.4                     |

**Table S5.** Experimental and calculated  $^1\text{H}$ -NMR chemical shifts of (6*R*\*, 8*S*\*)-3

| No.        | $\delta_{\text{exptl.}}$ | $\delta_{\text{calcd.}}$ |
|------------|--------------------------|--------------------------|
| 3          | 7.72                     | 8.21                     |
| 4          | 7.43                     | 7.78                     |
| 7 $\alpha$ | 1.7                      | 1.72                     |
| 7 $\beta$  | 2.36                     | 2.79                     |
| 10         | 5.47                     | 5.55                     |
| 10         | 5.55                     | 5.65                     |
| 12         | 3.58                     | 3.61                     |
| 12         | 3.61                     | 3.95                     |
| 13         | 1.34                     | 1.18                     |
| 14         | 1.37                     | 1.17                     |
| 15         | 3.64                     | 3.78                     |

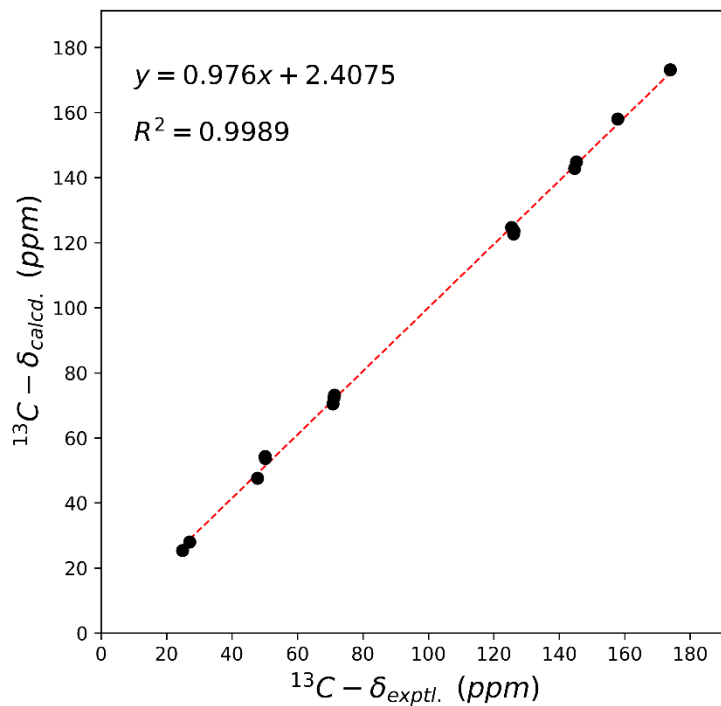

**Figure S5.** Linear regression analysis between experimental and calculated  $^{13}\text{C}$  NMR chemical shifts of ( $6R^*$ ,  $8S^*$ )-3.

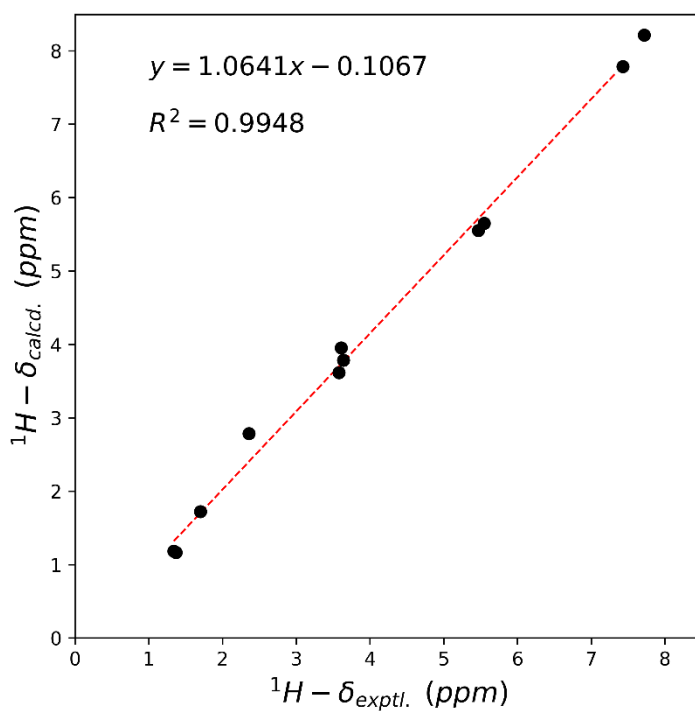

**Figure S6.** Linear regression analysis between experimental and calculated  $^1\text{H}$  NMR chemical shifts of ( $6R^*$ ,  $8S^*$ )-3.

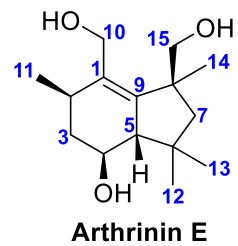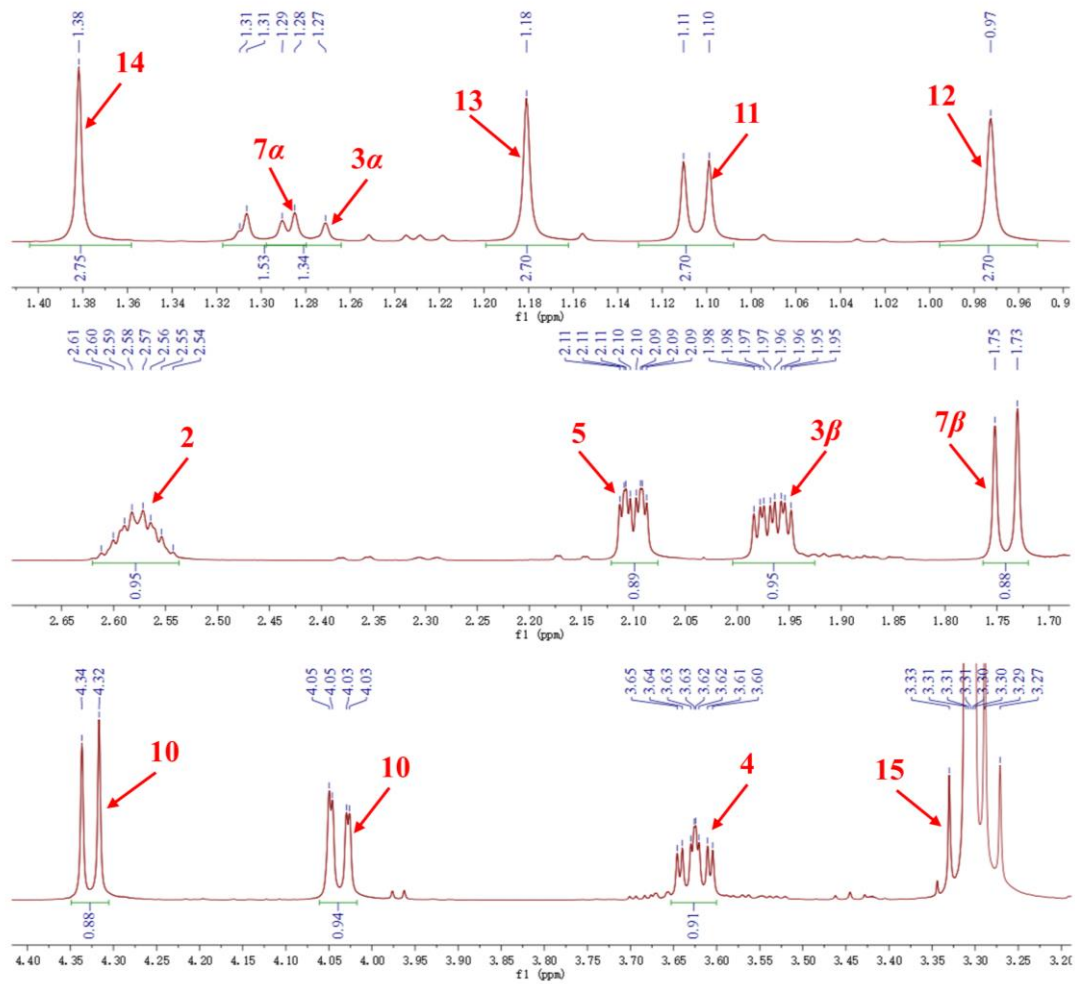

**Figure S7.** <sup>1</sup>H NMR spectrum of arthrinin E (1) (CD<sub>3</sub>OD).



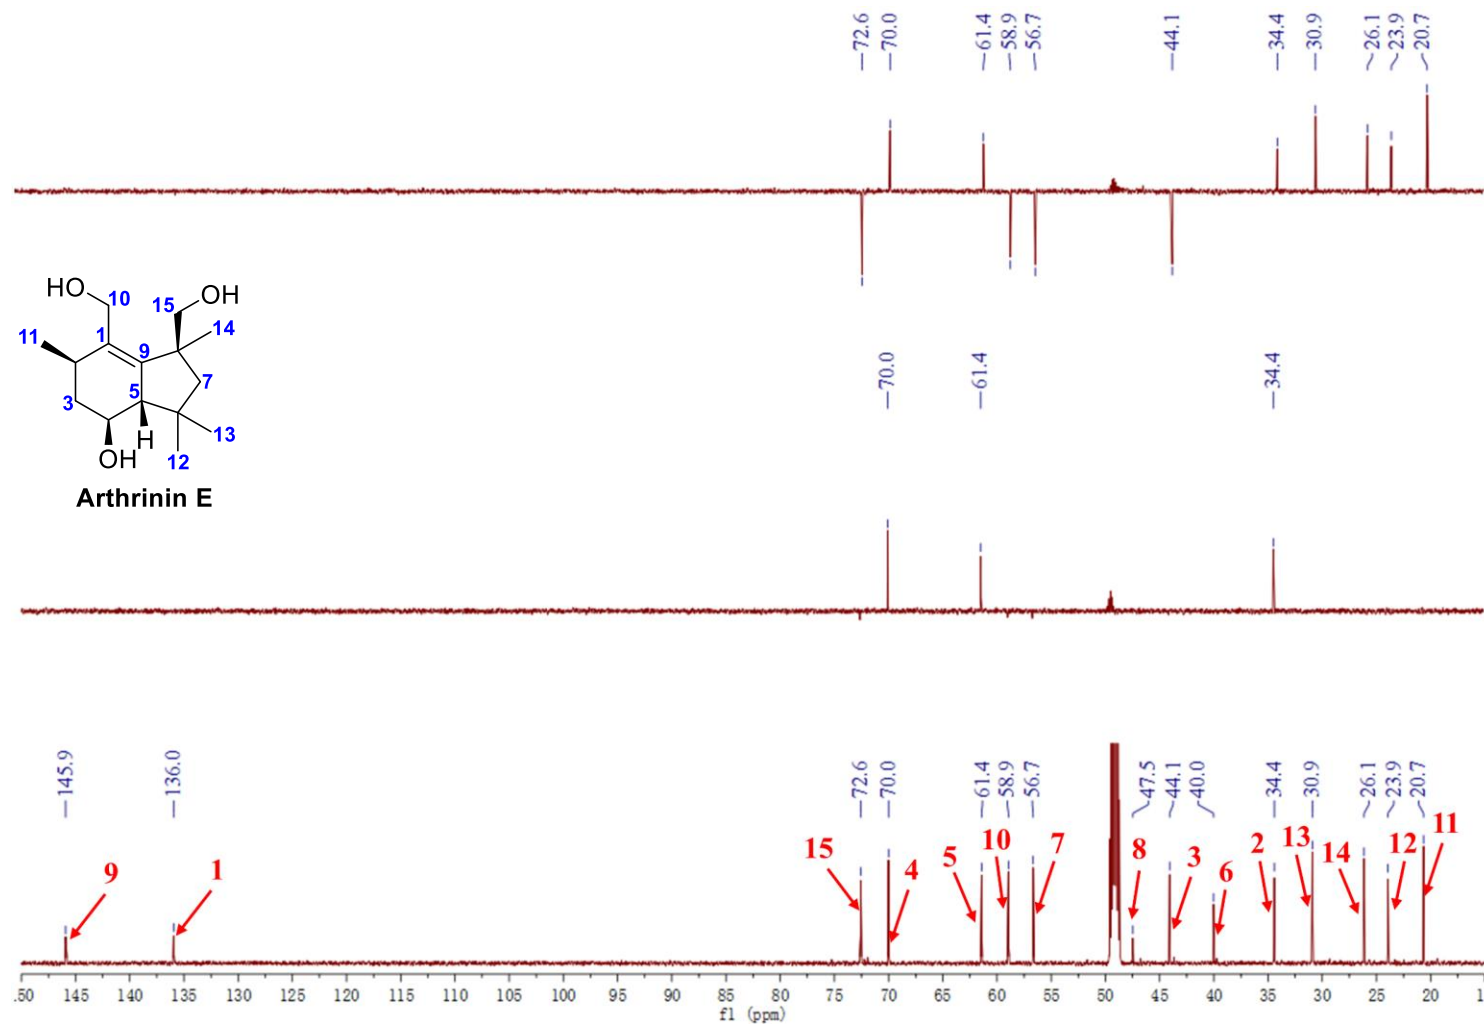

**Figure S8.**  $^{13}\text{C}$  NMR and DEPT spectrum of arthrinin E (1) ( $\text{CD}_3\text{OD}$ ).

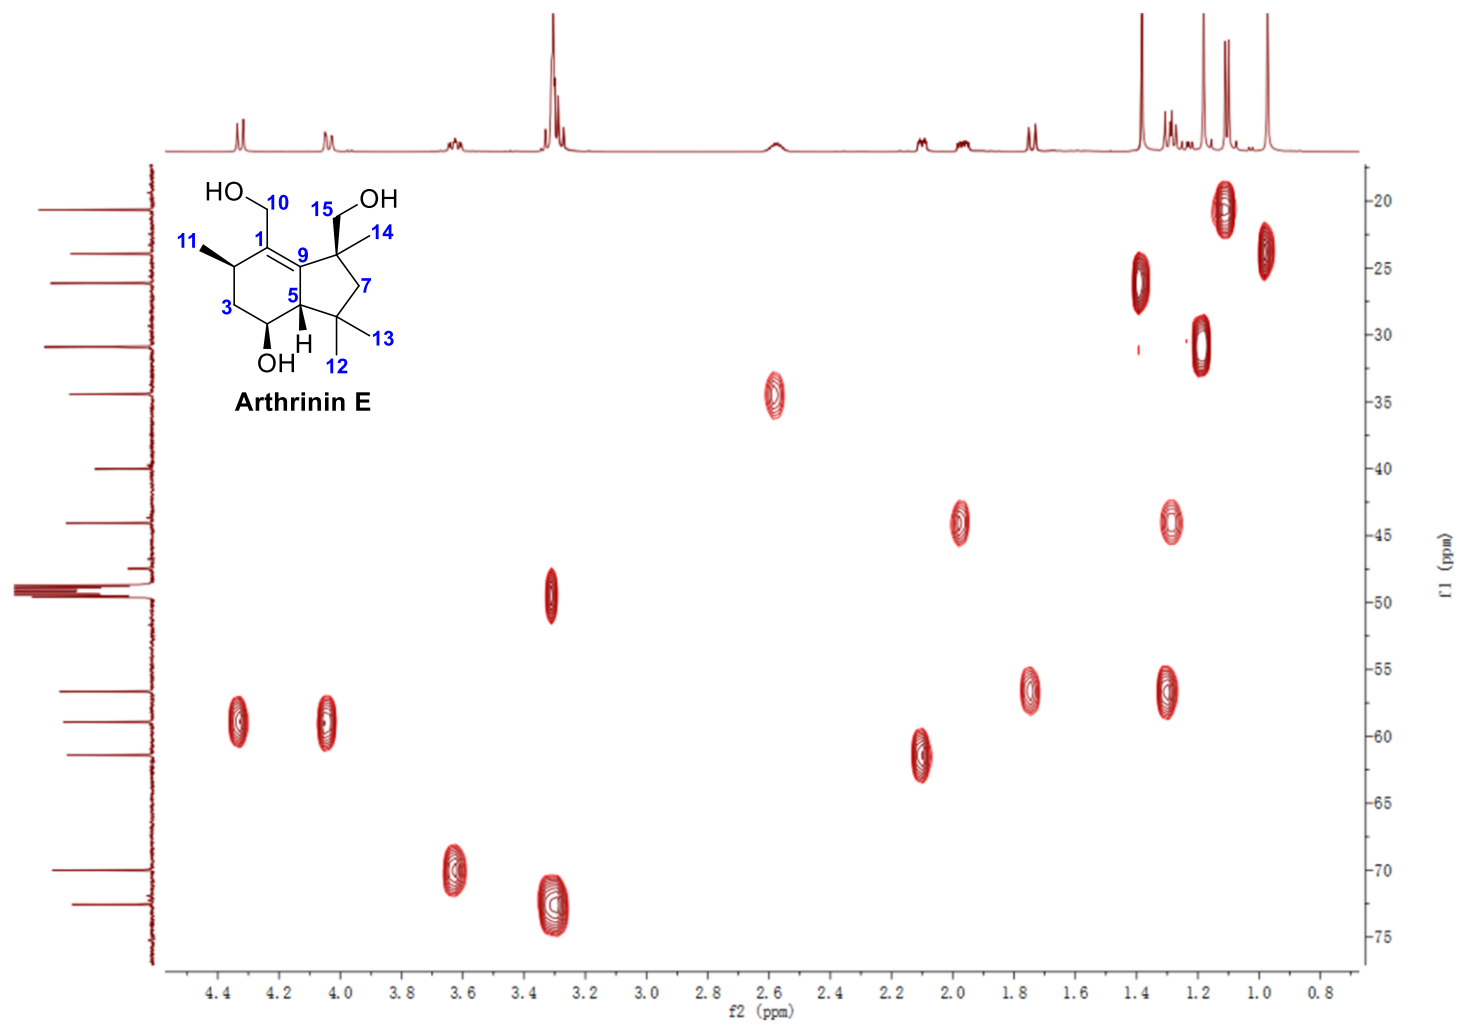

Figure S9. HSQC spectrum of arthrinin E (1) (CD<sub>3</sub>OD).

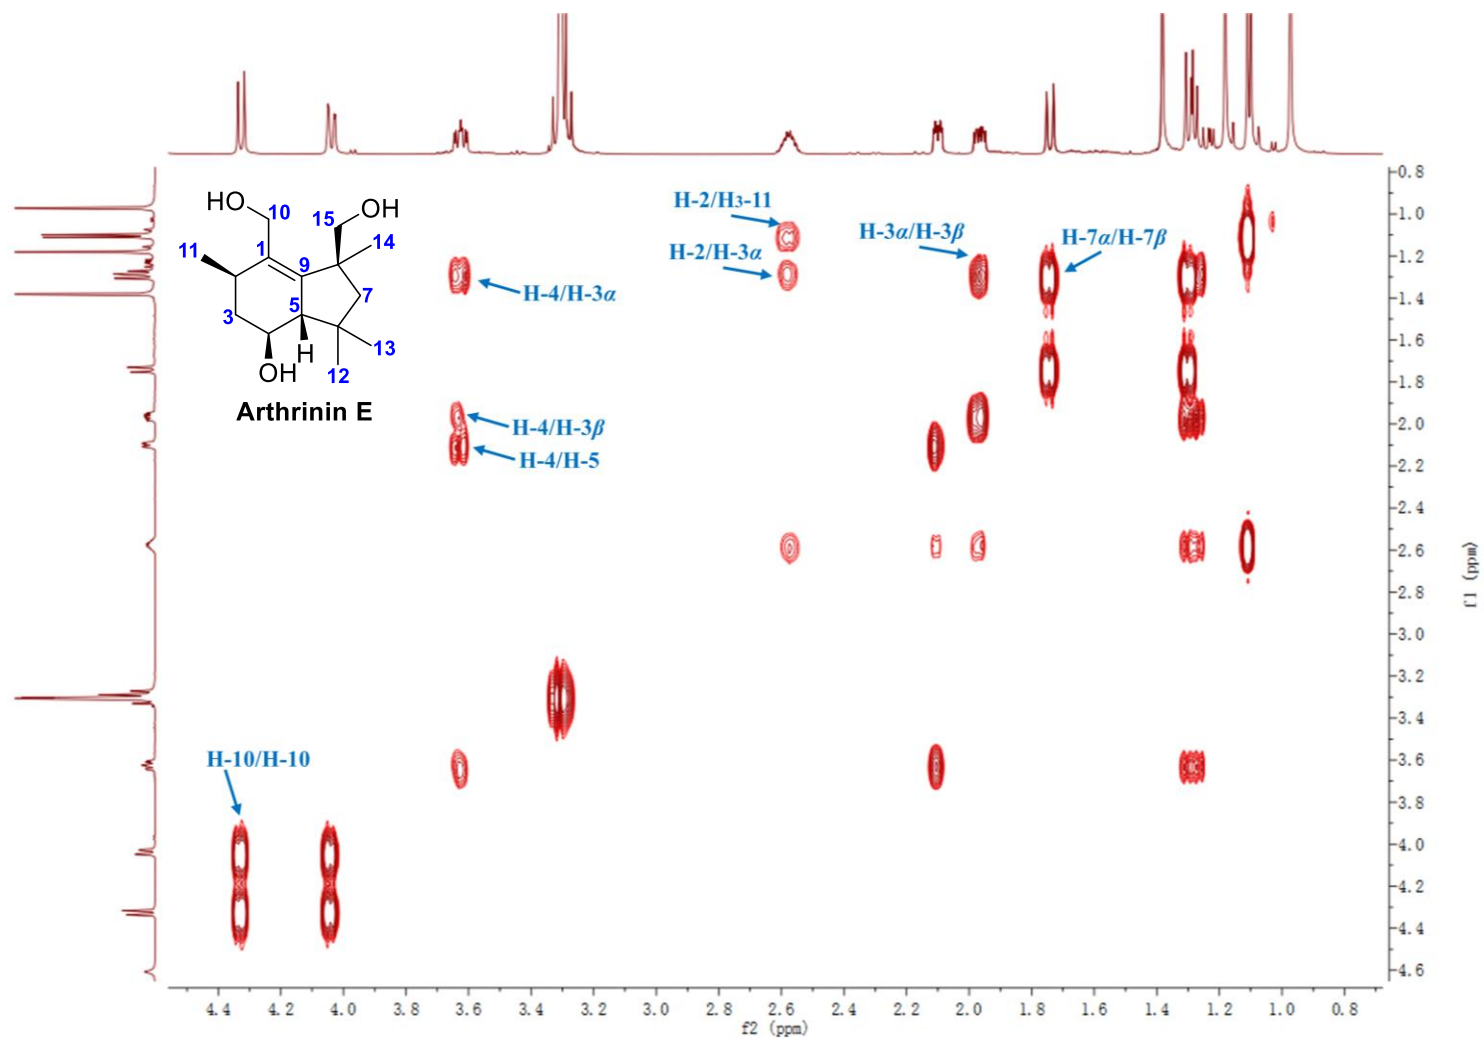

**Figure S10.**  $^1\text{H}$ - $^1\text{H}$  COSY spectrum of arthrinin E (1) ( $\text{CD}_3\text{OD}$ ) and the selected cross-peaks (blue arrow and text).

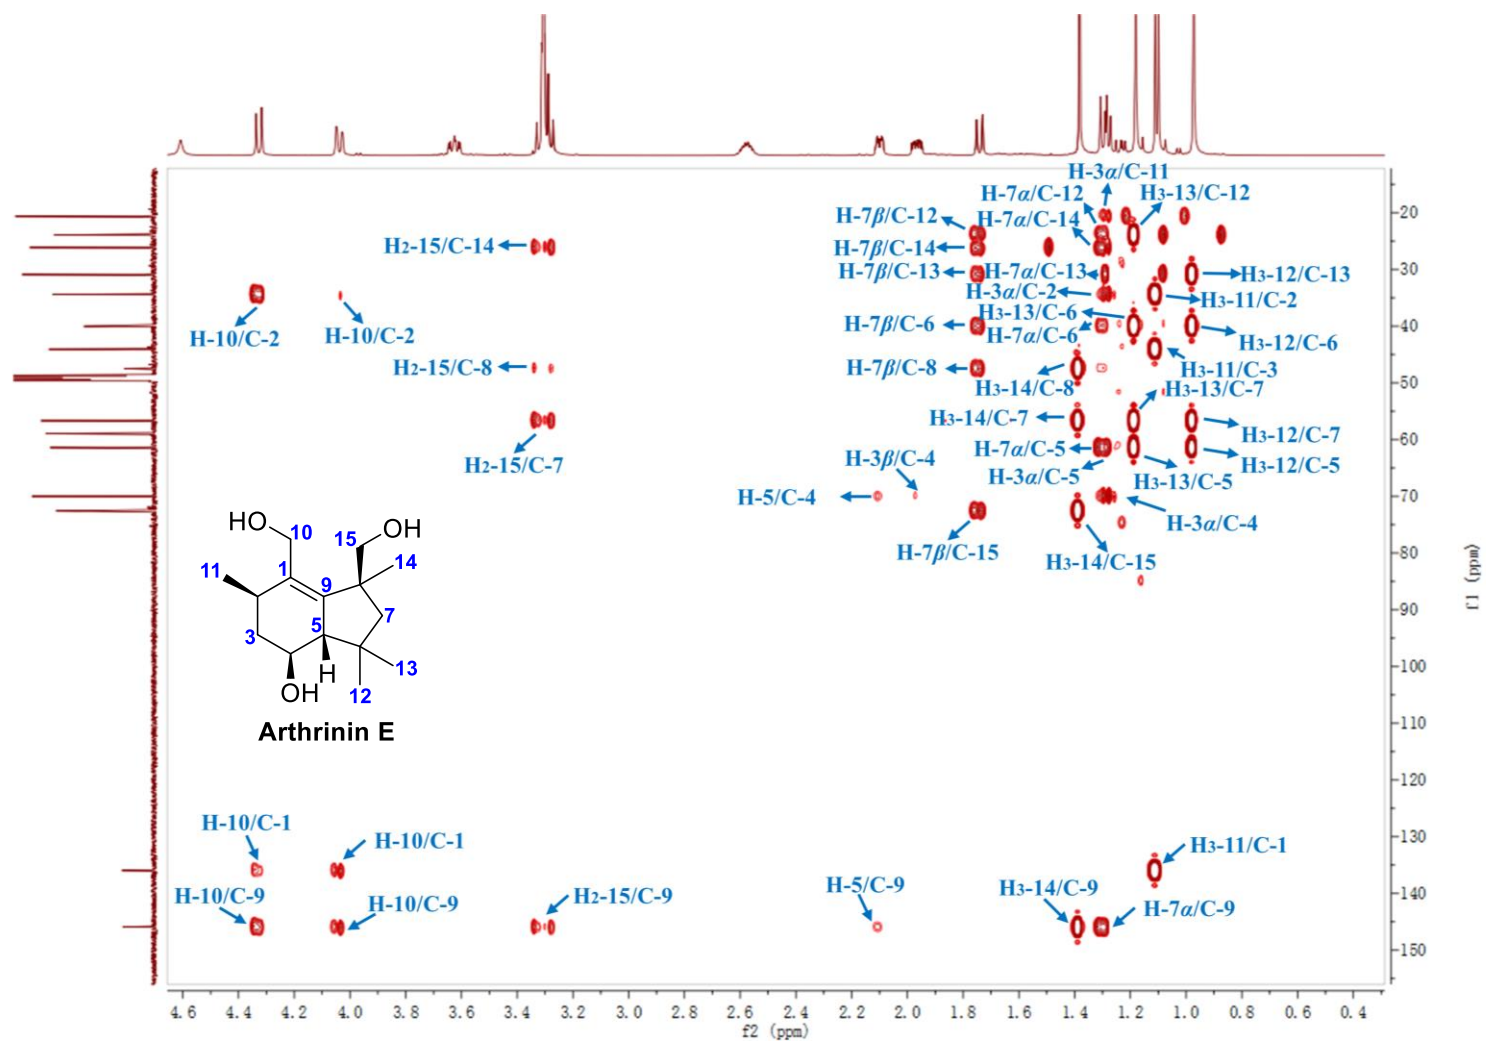

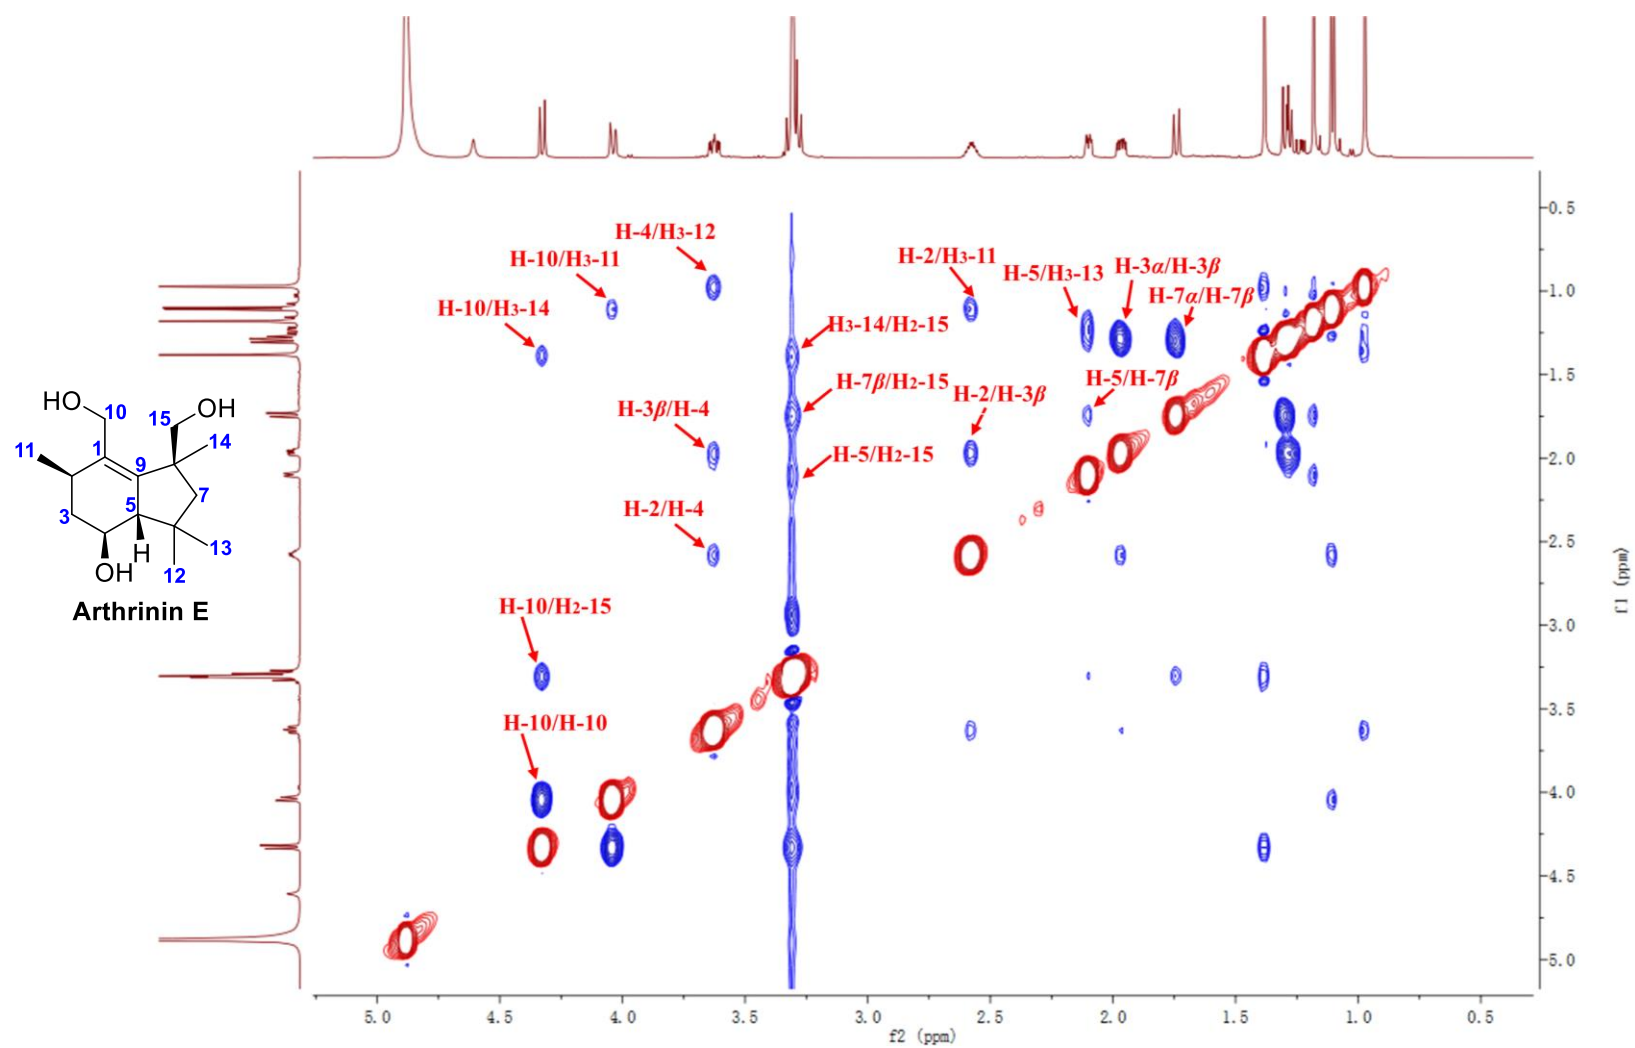

**Figure S12.** ROESY spectrum of arthrinin E (**1**) (CD<sub>3</sub>OD) and the selected correlations (red arrow and text).

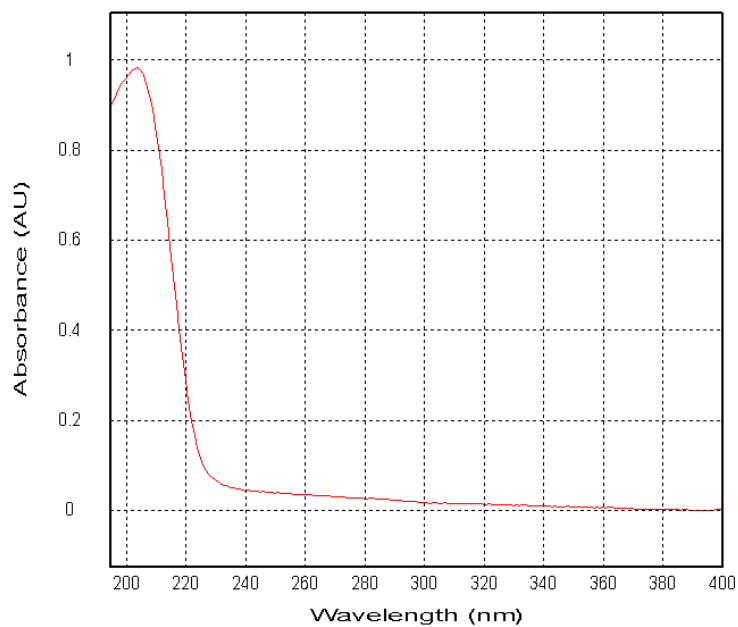

**Figure S13.** UV spectrum of arthrinin E (1).

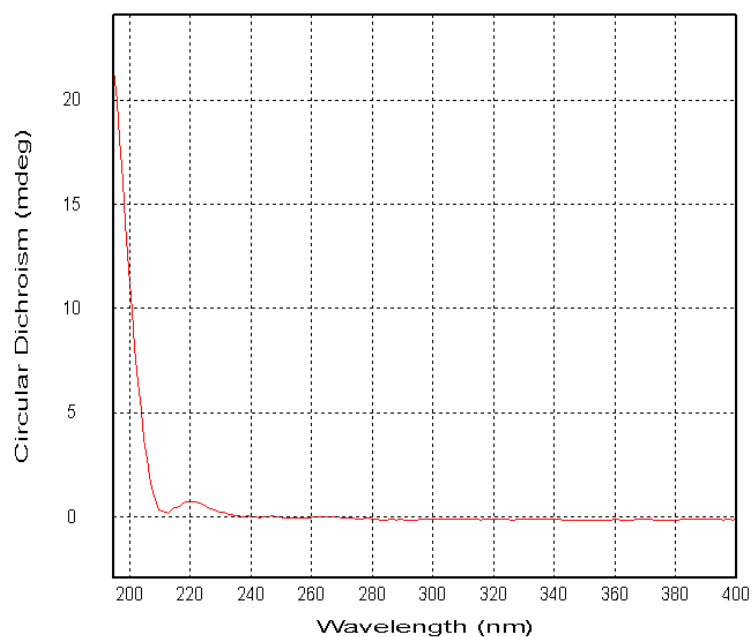

**Figure S14.** CD spectrum of arthrinin E (1).

| <u>n</u>    | <u>Average</u>   | <u>Std.Dev.</u> | <u>% RSD</u>  | <u>Maximum</u> | <u>Minimum</u> |               |              |                     |              |  |
|-------------|------------------|-----------------|---------------|----------------|----------------|---------------|--------------|---------------------|--------------|--|
| 5           | 66.60            | 0.55            | 0.82          | 67.00          | 66.00          |               |              |                     |              |  |
| <u>S.No</u> | <u>Sample ID</u> | <u>Time</u>     | <u>Result</u> | <u>Scale</u>   | <u>OR °Arc</u> | <u>WLG.nm</u> | <u>Lg.mm</u> | <u>Conc.g/100ml</u> | <u>Temp.</u> |  |
| 1           | SHSJ10a          | 05:13:02 PM     | 67.00         | SR             | 0.067          | 589           | 100.00       | 0.100               | 22.2         |  |
| 2           | SHSJ10a          | 05:13:08 PM     | 66.00         | SR             | 0.066          | 589           | 100.00       | 0.100               | 22.2         |  |
| 3           | SHSJ10a          | 05:13:13 PM     | 66.00         | SR             | 0.066          | 589           | 100.00       | 0.100               | 22.2         |  |
| 4           | SHSJ10a          | 05:13:19 PM     | 67.00         | SR             | 0.067          | 589           | 100.00       | 0.100               | 22.2         |  |
| 5           | SHSJ10a          | 05:13:25 PM     | 67.00         | SR             | 0.067          | 589           | 100.00       | 0.100               | 22.2         |  |

**Figure S15.** OR report of arthrinin E (1).

**Sample Group** Info.  
**Acquisition SW** 6200 series TOF/6500 series  
**Version** Q-TOF B.05.01 (B5125.2)

**User Spectra**

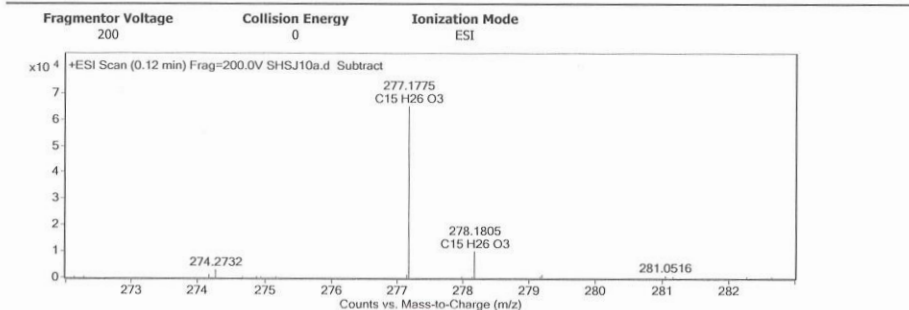

**Peak List**

| m/z      | z | Abund    | Formula    | Ion     |
|----------|---|----------|------------|---------|
| 189.1637 | 1 | 21920.52 |            |         |
| 219.1745 |   | 5139.8   |            |         |
| 277.1775 | 1 | 65107.77 | C15 H26 O3 | (M+Na)+ |
| 278.1805 | 1 | 10016.14 | C15 H26 O3 | (M+Na)+ |
| 293.1725 | 1 | 6303.07  |            |         |
| 353.2663 |   | 4566.59  |            |         |
| 413.2665 | 1 | 6455.12  |            |         |
| 437.1936 | 1 | 13273.71 |            |         |
| 610.1848 | 1 | 7861.26  |            |         |
| 659.2866 | 1 | 7321.34  |            |         |

**Formula Calculator Element Limits**

| Element | Min | Max |
|---------|-----|-----|
| C       | 3   | 60  |
| H       | 0   | 120 |
| O       | 0   | 30  |

**Formula Calculator Results**

| Formula    | CalculatedMass | CalculatedMz | Mz       | Diff. (mDa) | Diff. (ppm) | DBE    |
|------------|----------------|--------------|----------|-------------|-------------|--------|
| C15 H26 O3 | 254.1882       | 277.1774     | 277.1775 | -0.10       | -0.36       | 3.0000 |

**Figure S16.** HRESIMS spectrum of arthrinin E (1).

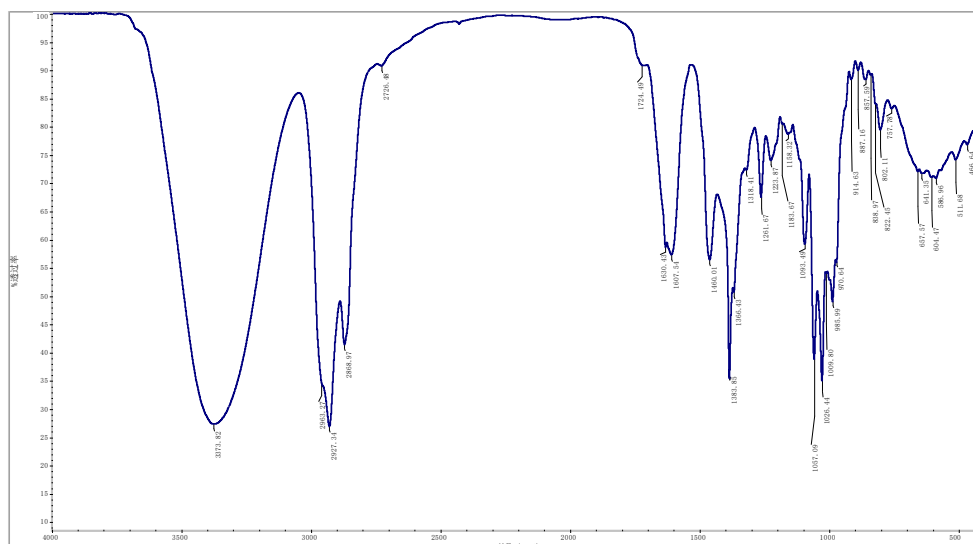

**Figure S17.** IR spectrum of arthrinin E (1).

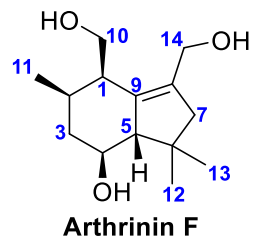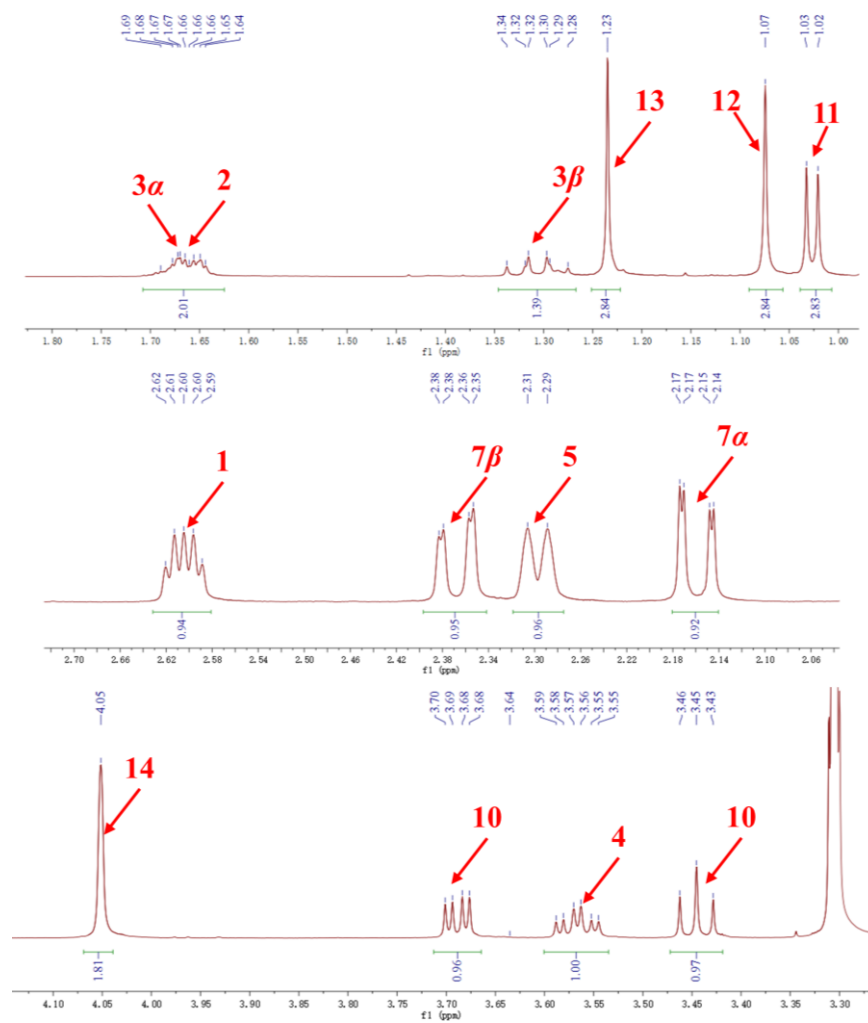

**Figure S18.** <sup>1</sup>H NMR spectrum of arthrinin F (2) (CD<sub>3</sub>OD).



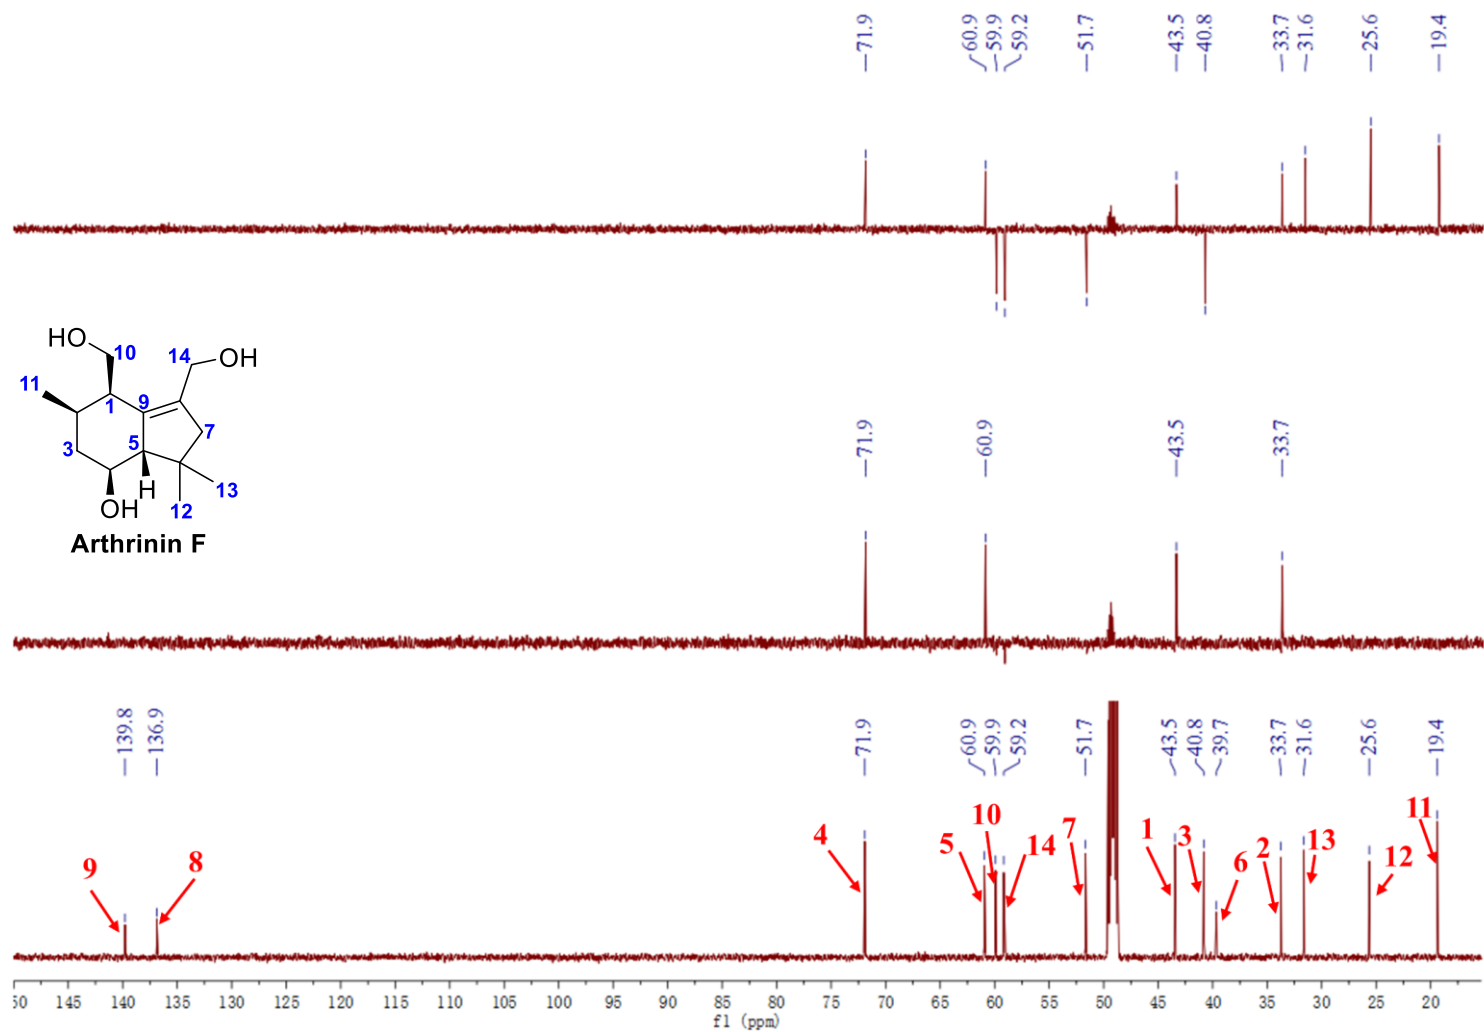

Figure S19.  $^{13}\text{C}$  NMR and DEPT spectrum of arthrinin F (2) ( $\text{CD}_3\text{OD}$ ).

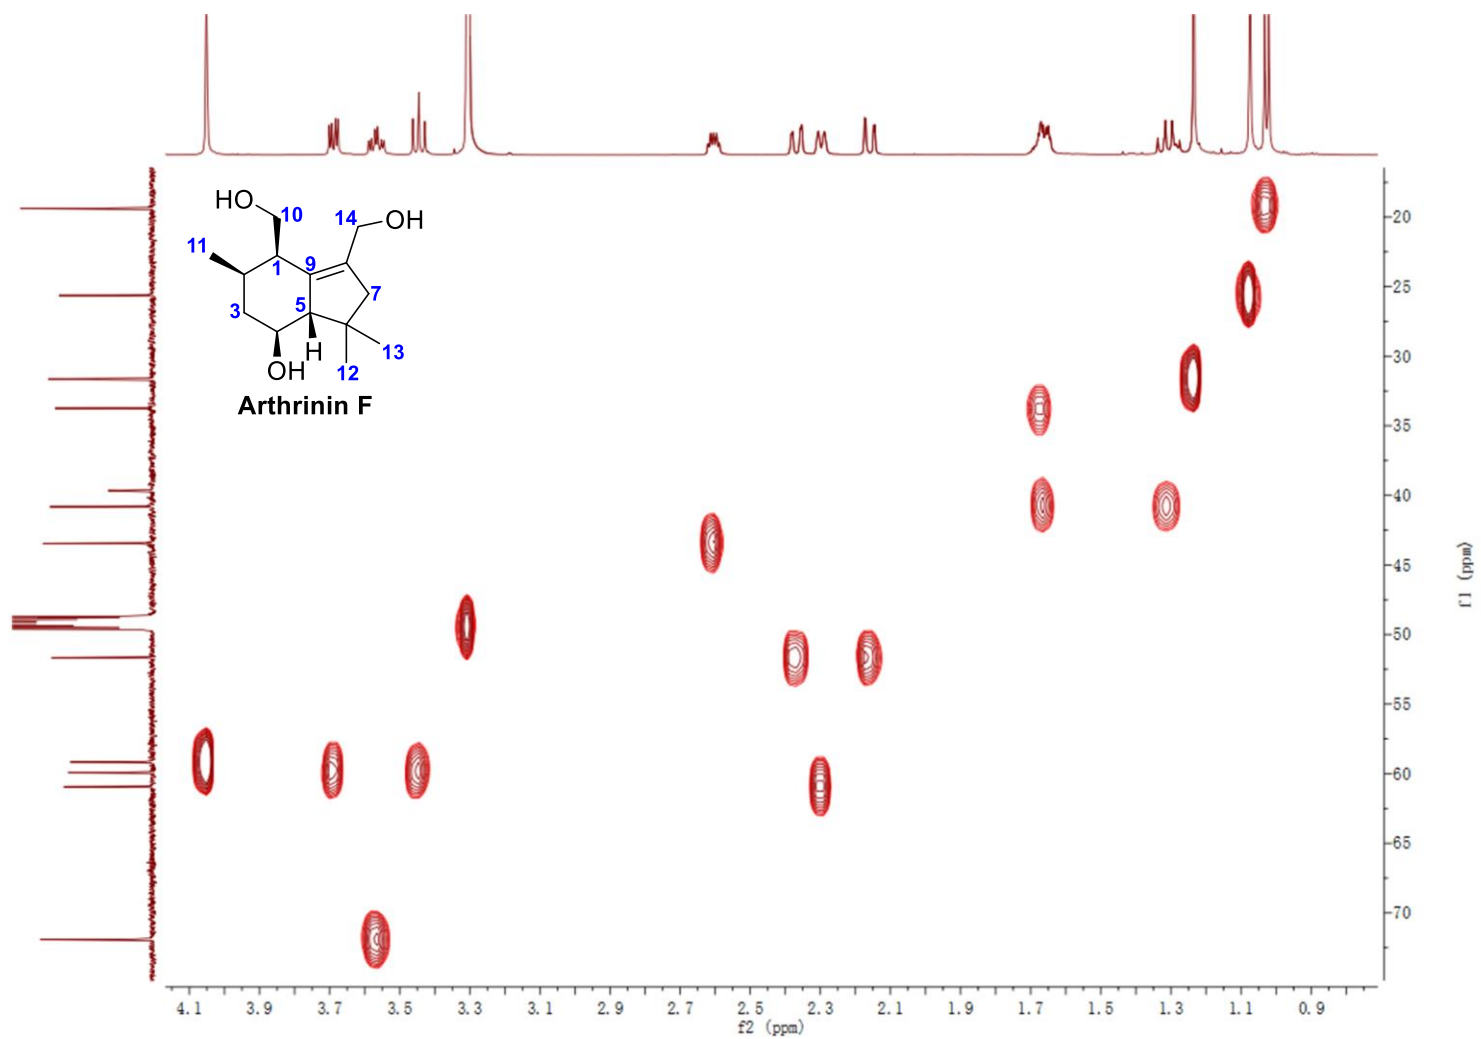

Figure S20. HSQC spectrum of arthrinin F (2) ( $\text{CD}_3\text{OD}$ ).

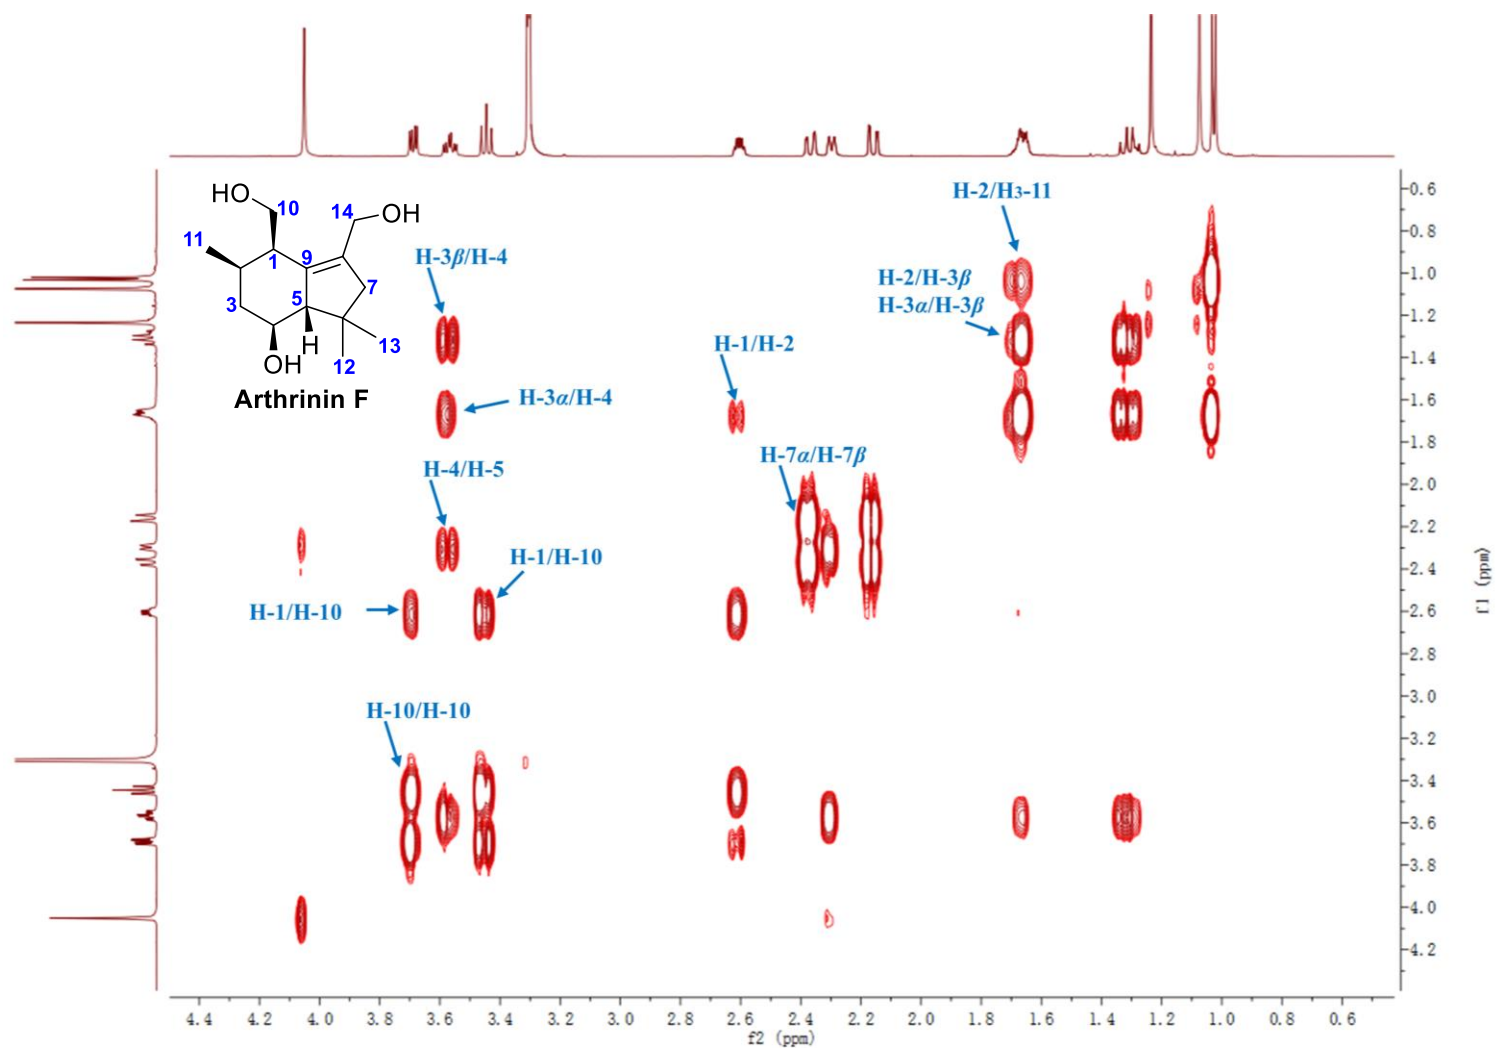

**Figure S21.**  $^1\text{H}$ - $^1\text{H}$  COSY spectrum of arthrinin F (2) ( $\text{CD}_3\text{OD}$ ) and the selected cross-peaks (blue arrow and text).

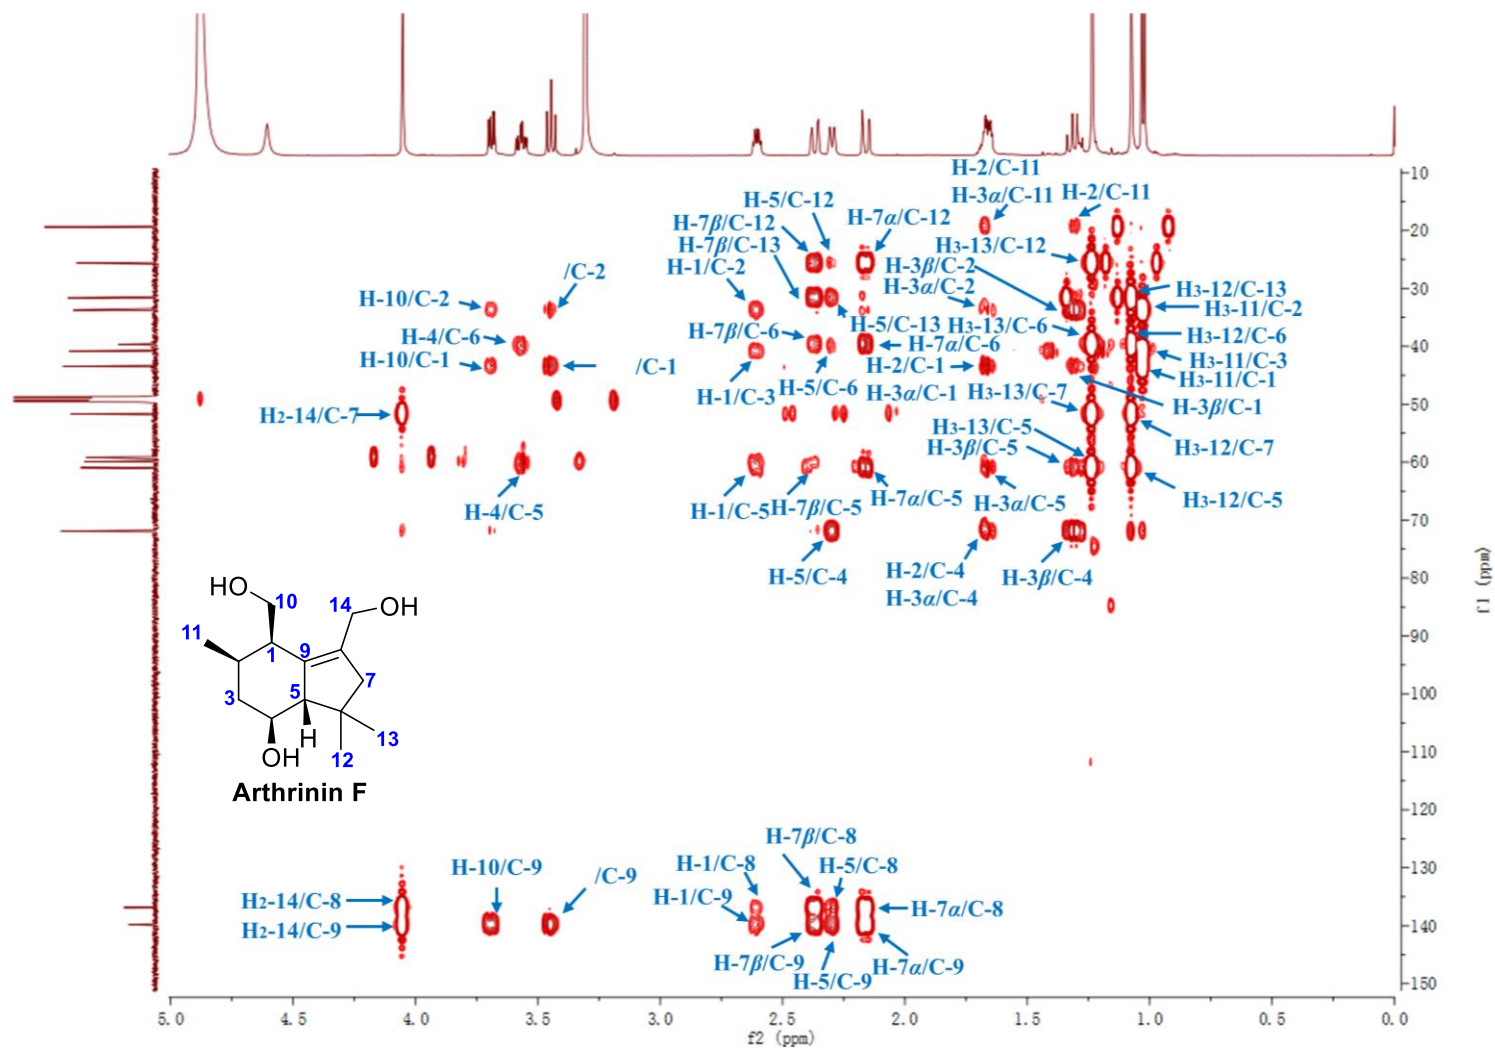

Figure S22. HMBC spectrum of arthrinin F (2) (CD<sub>3</sub>OD) and the selected correlations (blue arrow and text).

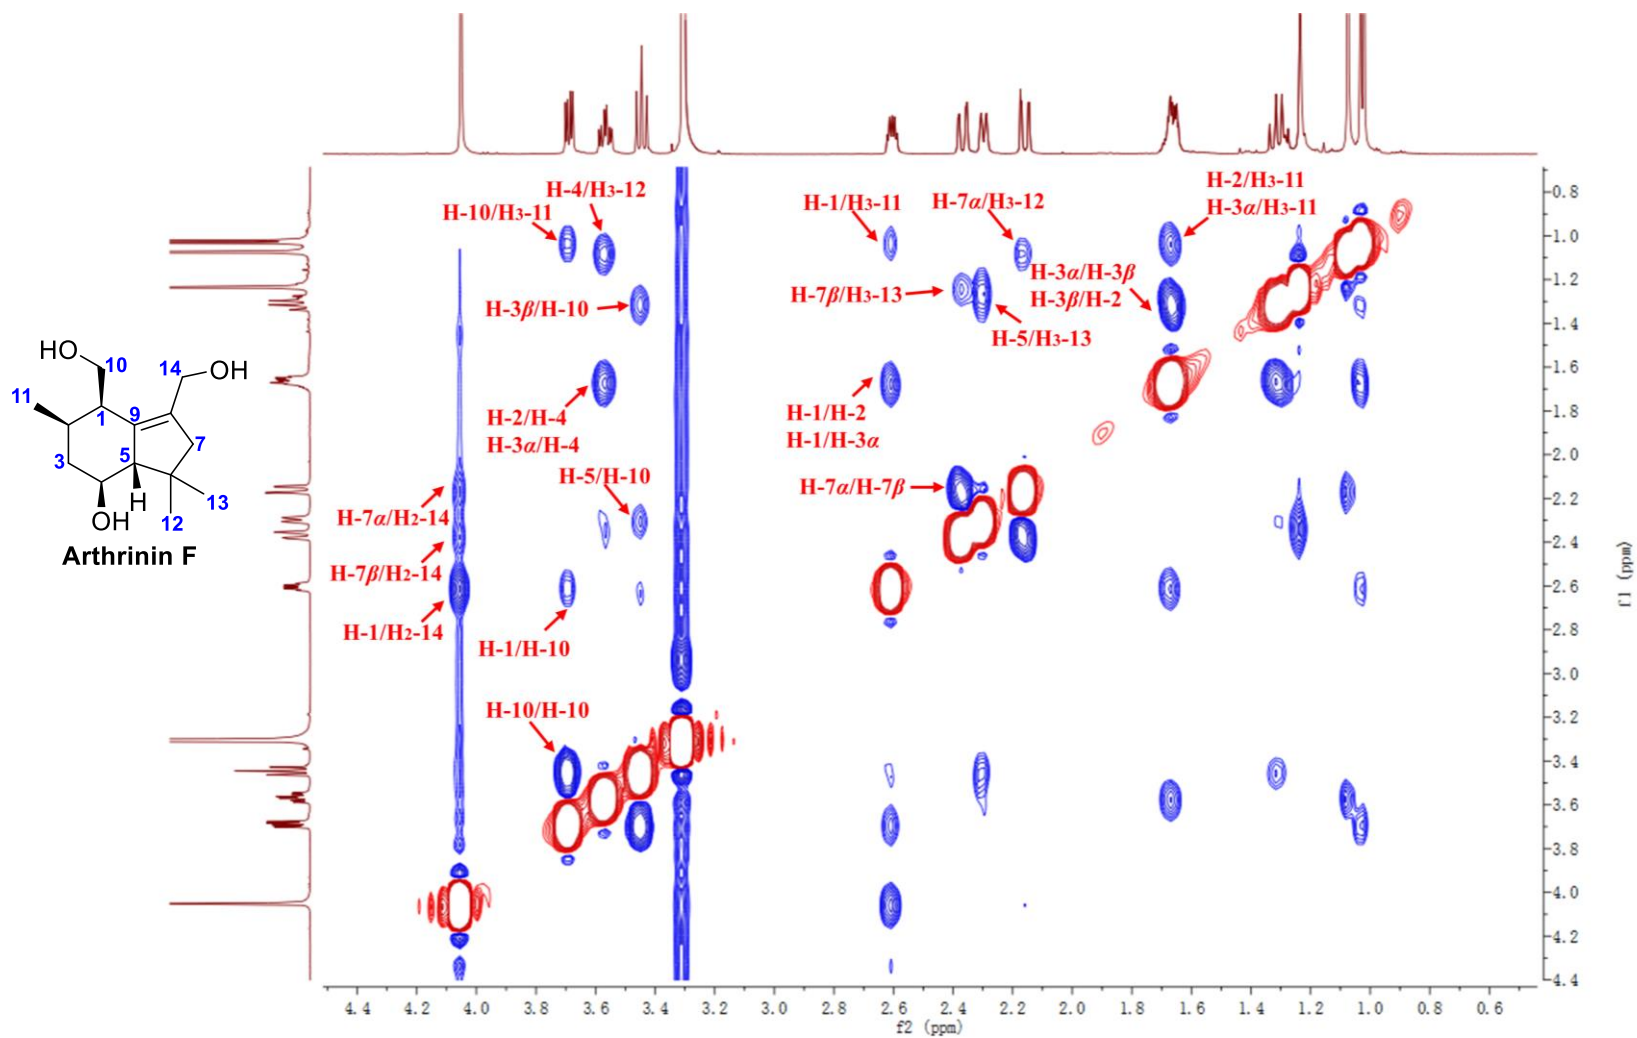

Figure S23. ROESY spectrum of arthrinin F (2) (CD<sub>3</sub>OD) and the selected correlations (red arrow and text).

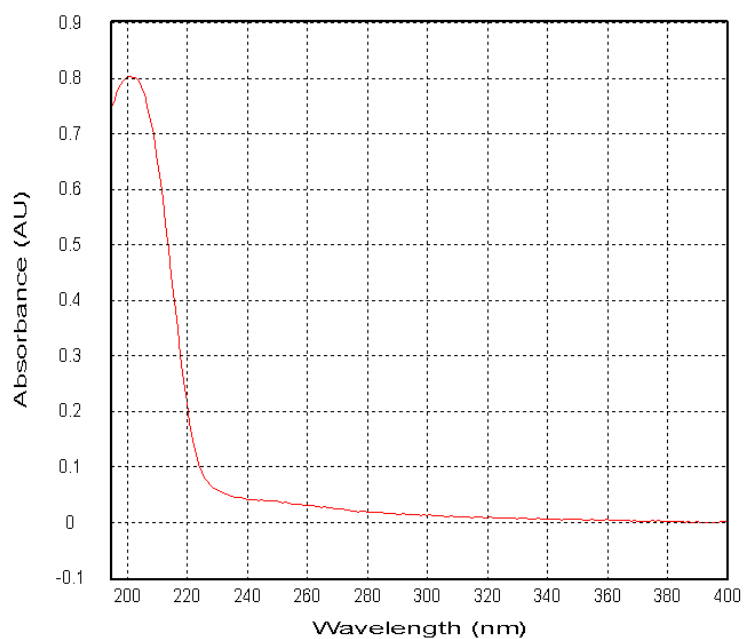

Figure S24. UV spectrum of arthrinin F (2).

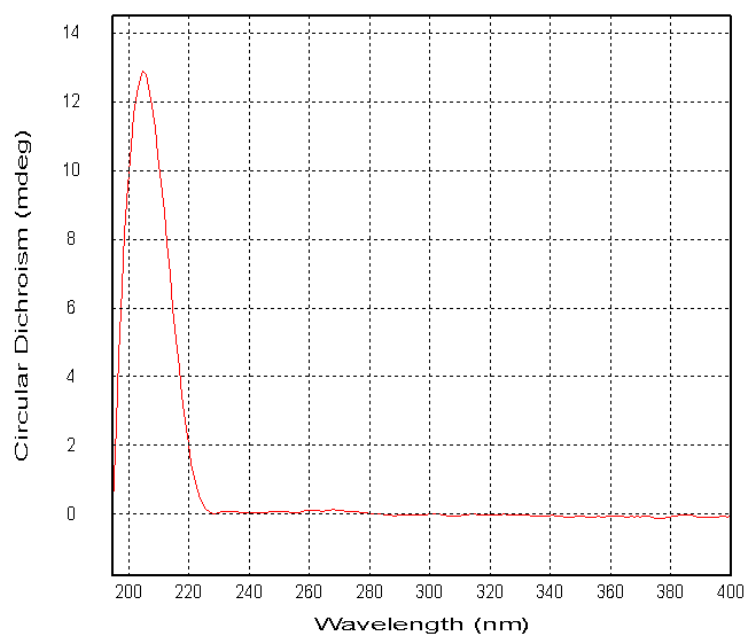

Figure S25. CD spectrum of arthrinin F (2).

| <u>n</u>    | <u>Average</u>   | <u>Std.Dev.</u> | <u>% RSD</u>  | <u>Maximum</u> | <u>Minimum</u> |               |              |                     |              |  |
|-------------|------------------|-----------------|---------------|----------------|----------------|---------------|--------------|---------------------|--------------|--|
| 5           | 107.00           | 0.74            | 0.69          | 108.33         | 106.67         |               |              |                     |              |  |
| <u>S.No</u> | <u>Sample ID</u> | <u>Time</u>     | <u>Result</u> | <u>Scale</u>   | <u>OR °Arc</u> | <u>WLG.nm</u> | <u>Lg.mm</u> | <u>Conc.g/100ml</u> | <u>Temp.</u> |  |
| 1           | SHSJ10b          | 04:35:04 PM     | 106.67        | SR             | 0.064          | 589           | 100.00       | 0.060               | 22.5         |  |
| 2           | SHSJ10b          | 04:35:10 PM     | 106.67        | SR             | 0.064          | 589           | 100.00       | 0.060               | 22.4         |  |
| 3           | SHSJ10b          | 04:35:16 PM     | 108.33        | SR             | 0.065          | 589           | 100.00       | 0.060               | 22.4         |  |
| 4           | SHSJ10b          | 04:35:22 PM     | 106.67        | SR             | 0.064          | 589           | 100.00       | 0.060               | 22.4         |  |
| 5           | SHSJ10b          | 04:35:27 PM     | 106.67        | SR             | 0.064          | 589           | 100.00       | 0.060               | 22.4         |  |

Figure S26. OR report of arthrinin F (2).

**Sample Group** Info.  
**Acquisition SW** 6200 series TOF/6500 series  
**Version** Q-TOF B.05.01 (B5125.2)

**User Spectra**

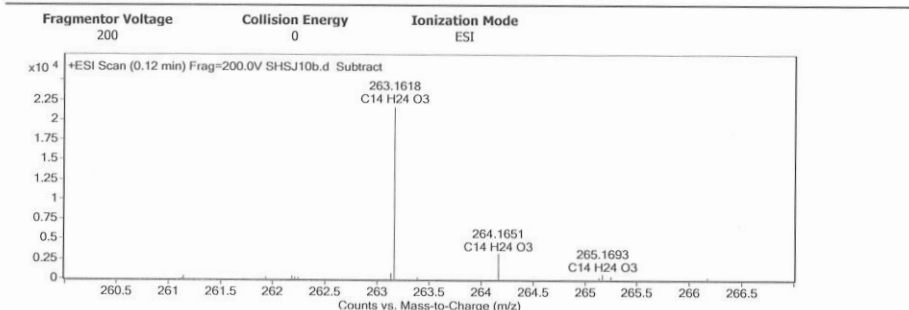

**Peak List**

| m/z      | z | Abund    | Formula    | Ion     |
|----------|---|----------|------------|---------|
| 119.0855 | 1 | 5423.87  |            |         |
| 145.1008 |   | 3192.99  |            |         |
| 175.1479 |   | 4392.33  |            |         |
| 187.148  | 1 | 3161.62  |            |         |
| 205.1587 | 1 | 3847.78  |            |         |
| 263.1618 | 1 | 21597.61 | C14 H24 O3 | (M+Na)+ |
| 267.1573 | 1 | 3985.24  |            |         |
| 413.2666 | 1 | 5714.33  |            |         |
| 437.1934 | 1 | 6127.32  |            |         |
| 709.2045 | 1 | 3395.35  |            |         |

**Formula Calculator Element Limits**

| Element | Min | Max |
|---------|-----|-----|
| C       | 3   | 60  |
| H       | 0   | 120 |
| O       | 0   | 30  |

**Formula Calculator Results**

| Formula    | CalculatedMass | CalculatedMz | Mz       | Diff. (mDa) | Diff. (ppm) | DBE    |
|------------|----------------|--------------|----------|-------------|-------------|--------|
| C14 H24 O3 | 240.1725       | 263.1618     | 263.1618 | 0.00        | 0.00        | 3.0000 |

**Figure S27. HRESIMS spectrum of arthrinin F (2)**

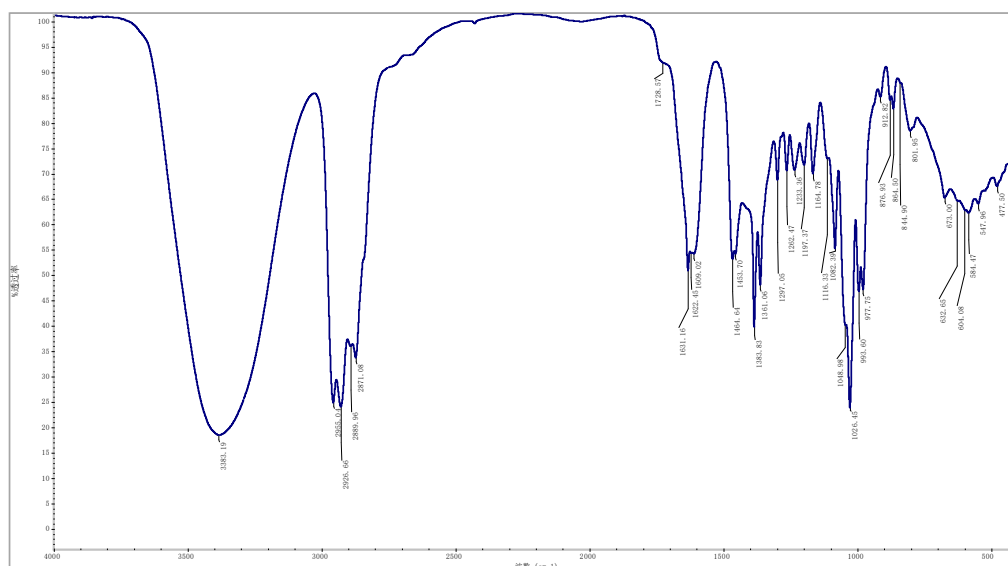

**Figure S28. IR spectrum of arthrinin F (2).**

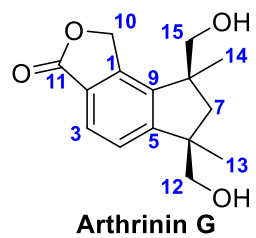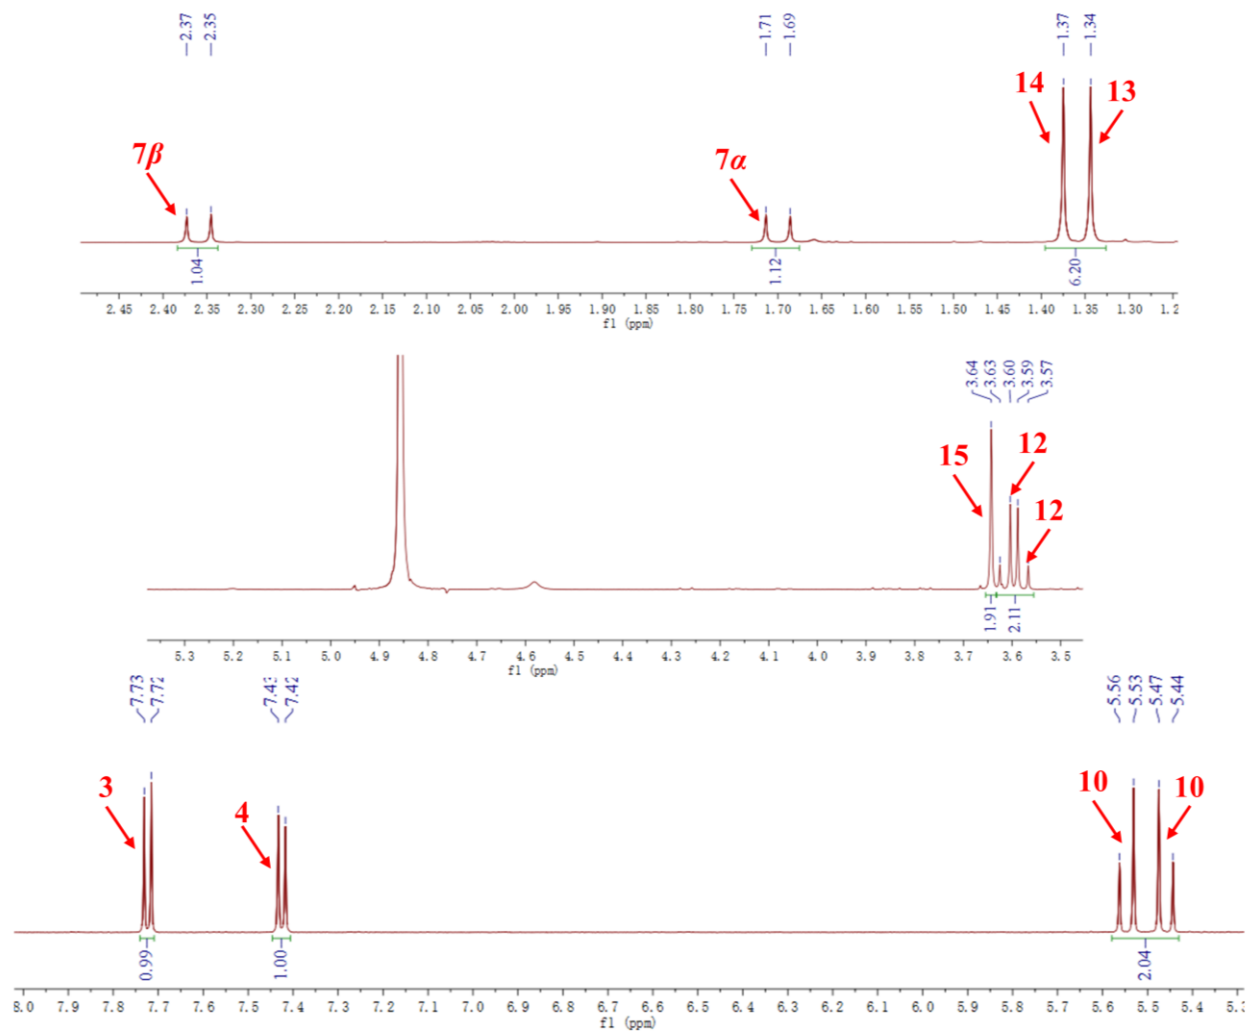

**Figure S29.** <sup>1</sup>H NMR spectrum of arthrinin G (**3**) (CD<sub>3</sub>OD).



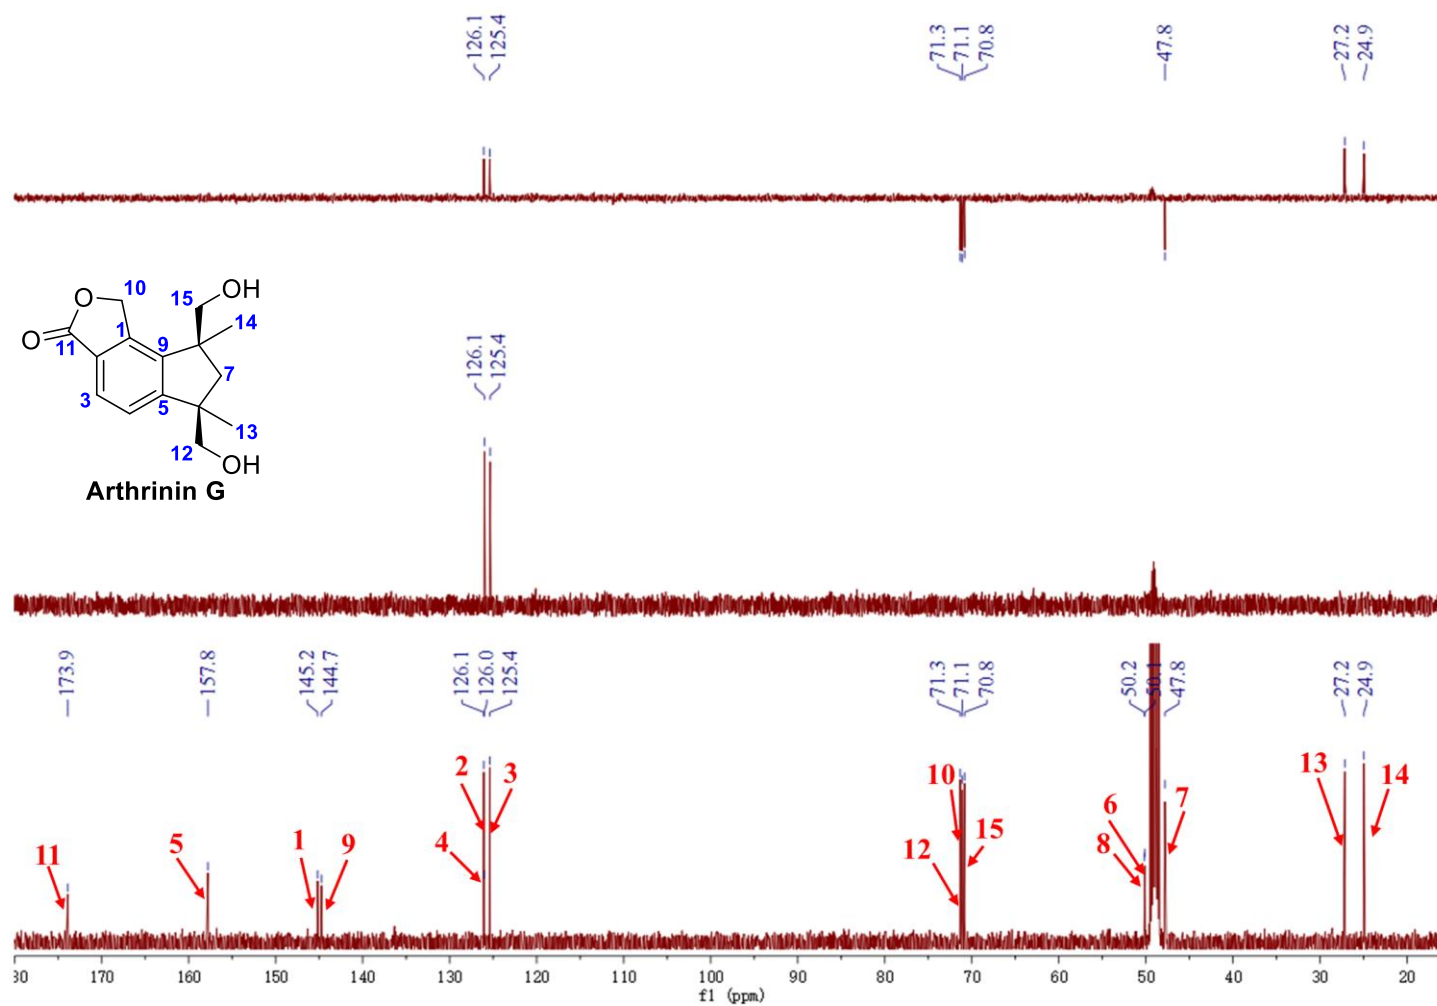

Figure S30. <sup>13</sup>C NMR and DEPT spectrum of arthrinin G (3) (CD<sub>3</sub>OD).

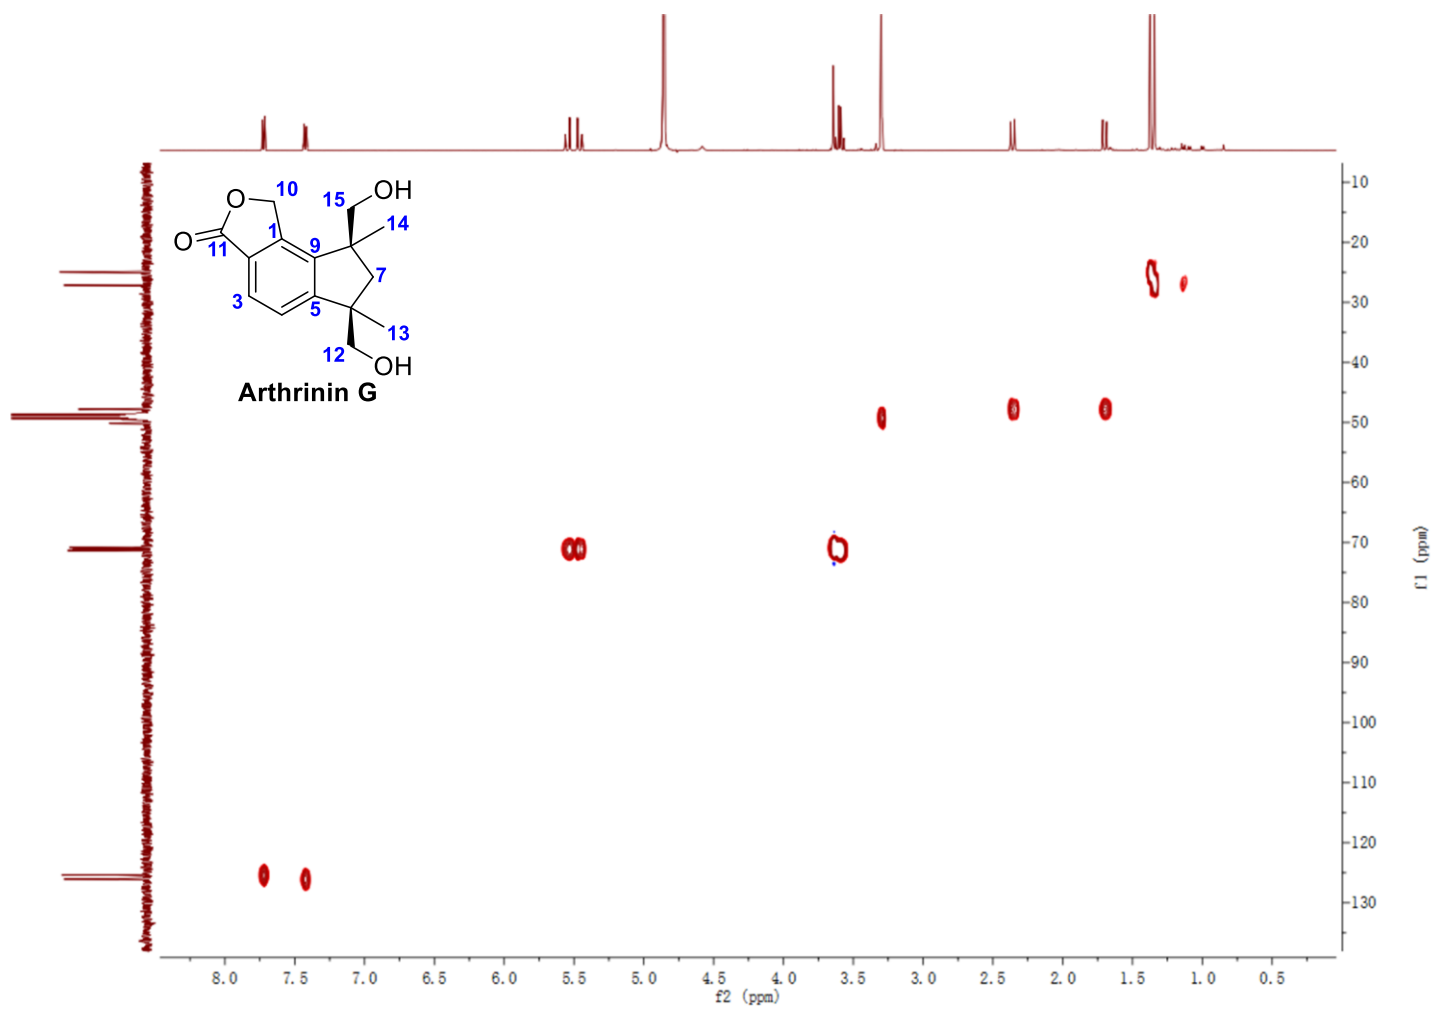

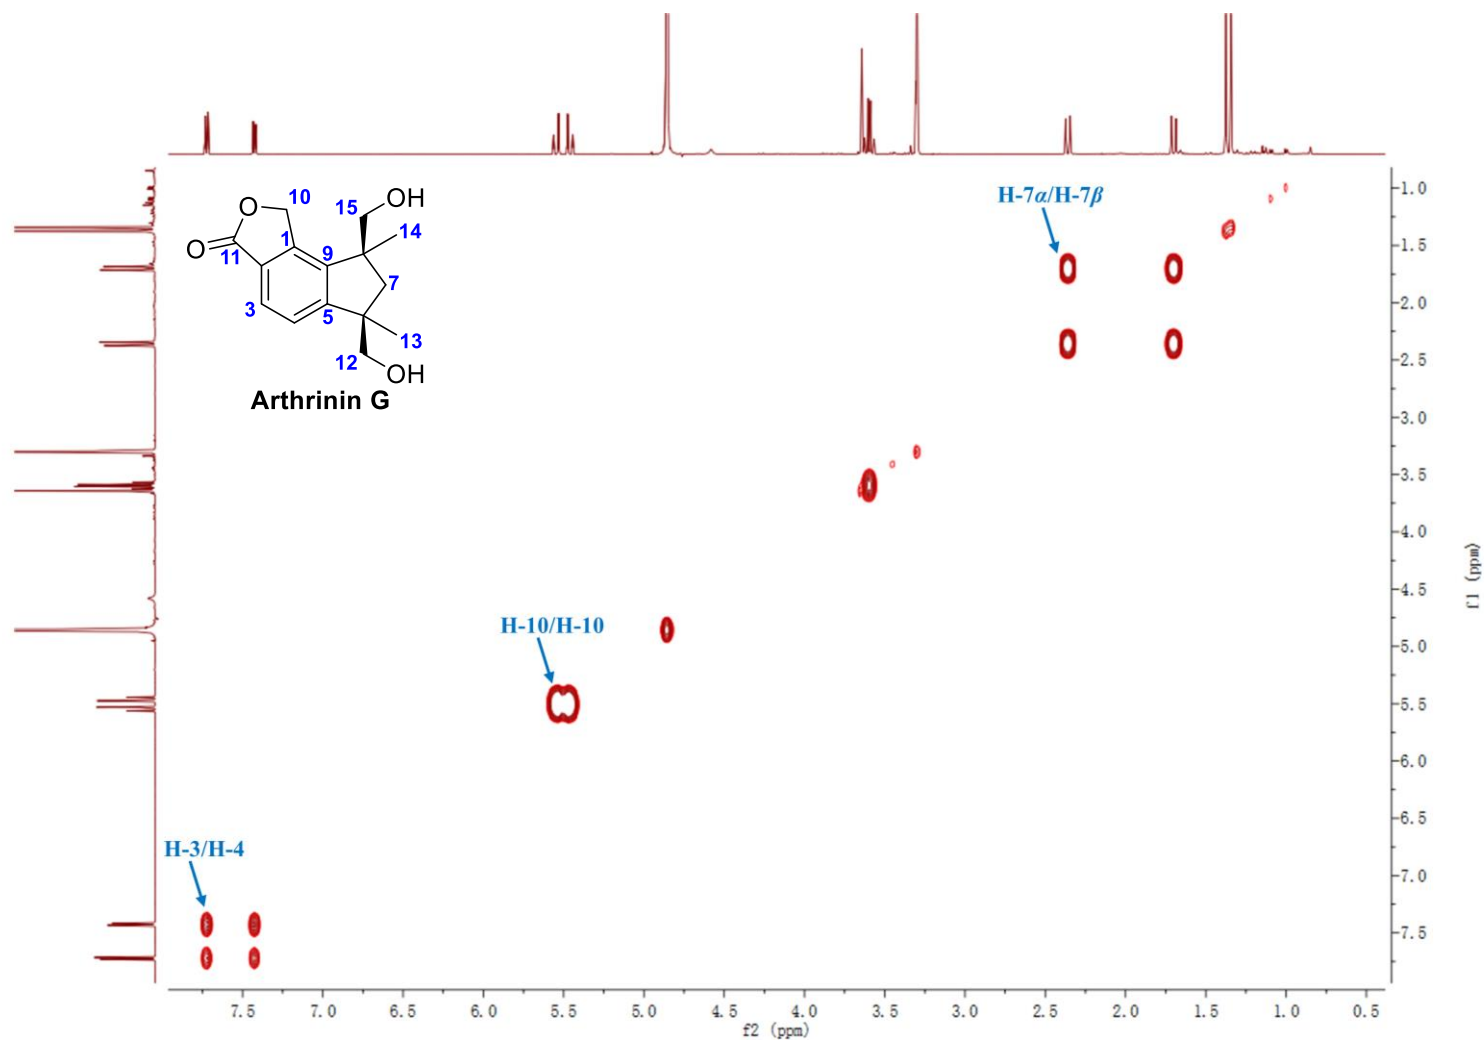

**Figure S32.**  $^1\text{H}$ - $^1\text{H}$  COSY spectrum of arthrinin G (**3**) ( $\text{CD}_3\text{OD}$ ) and the selected cross-peaks (blue arrow and text).

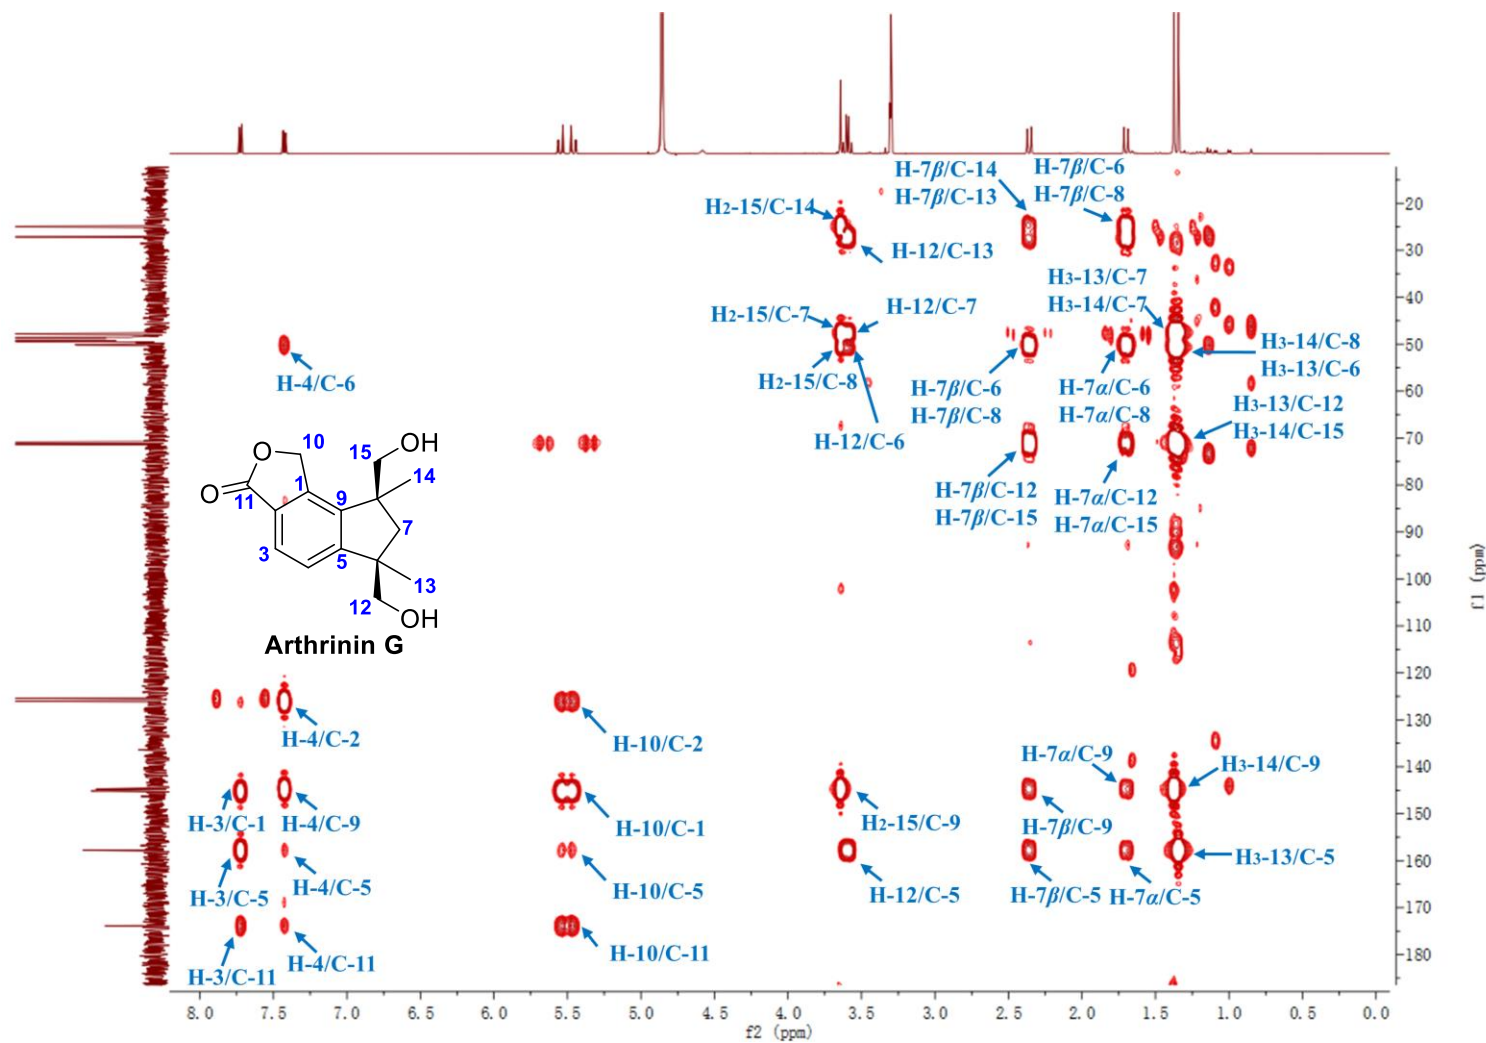

Figure S33. HMBC spectrum of arthrinin G (3) (CD<sub>3</sub>OD) and the selected correlations (blue arrow and text).

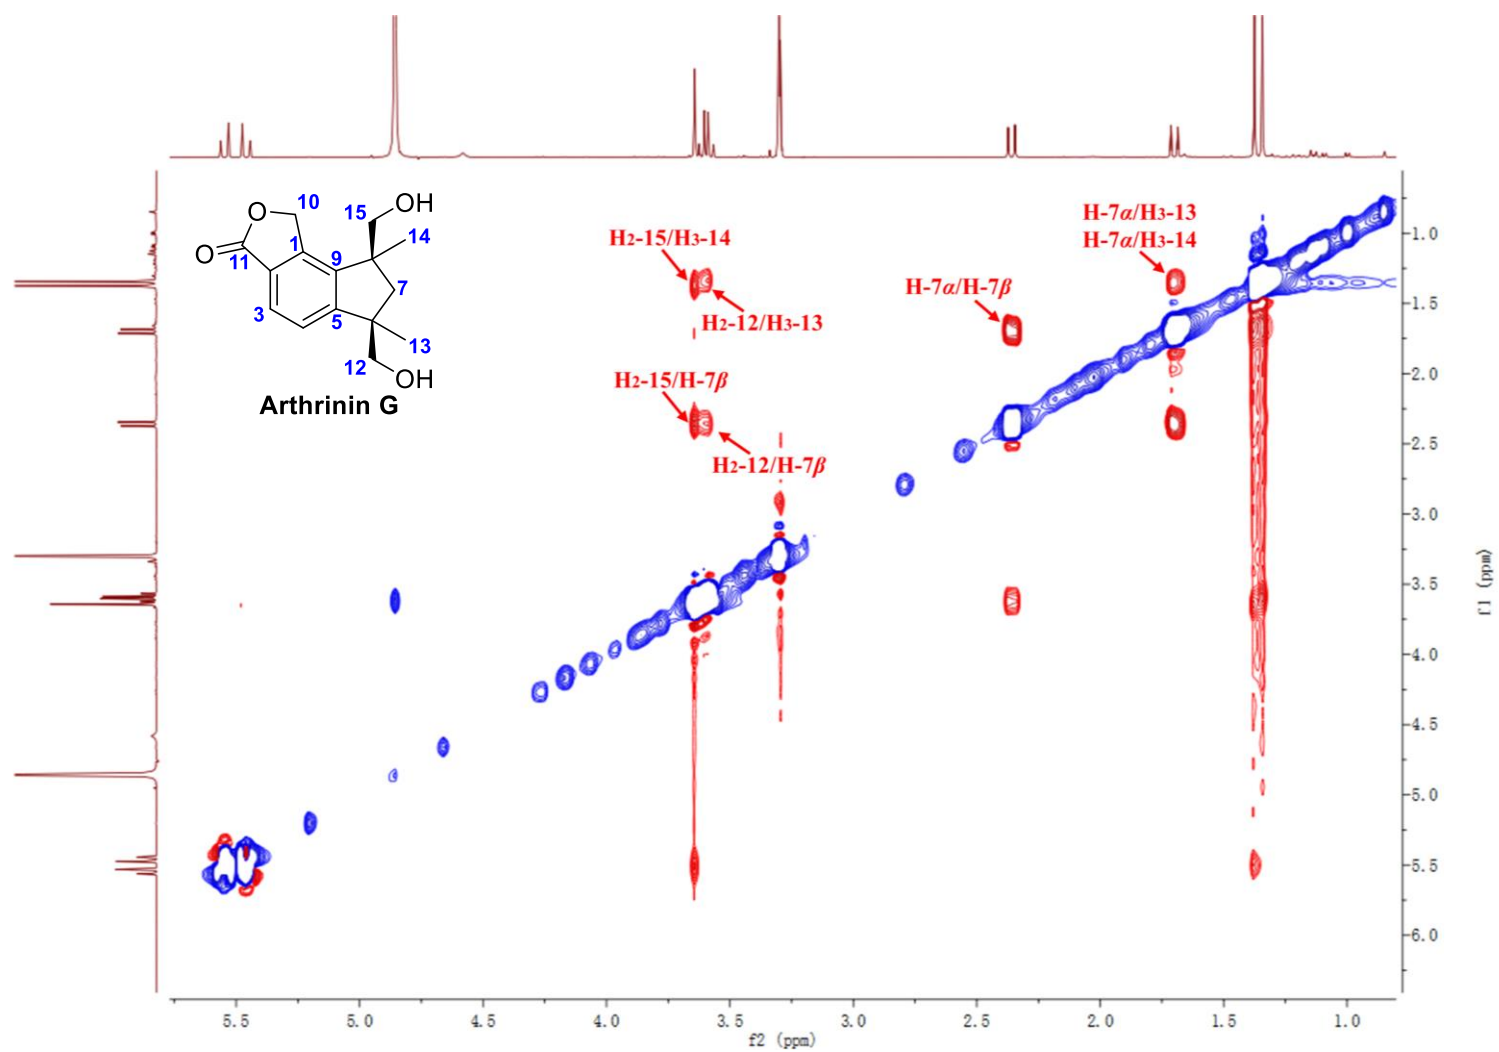

Figure S34. ROESY spectrum of arthrinin G (**3**) (CD<sub>3</sub>OD) and the selected correlations (red arrow and text).

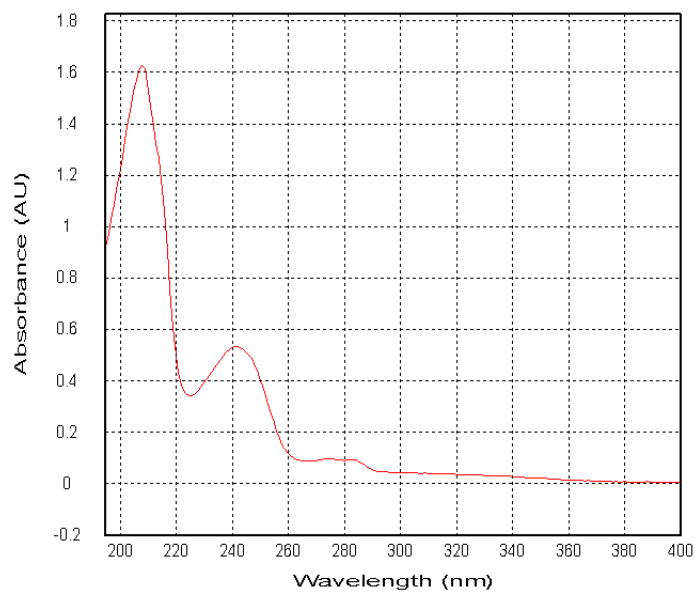

Figure S35. UV spectrum of arthrinin G (3).

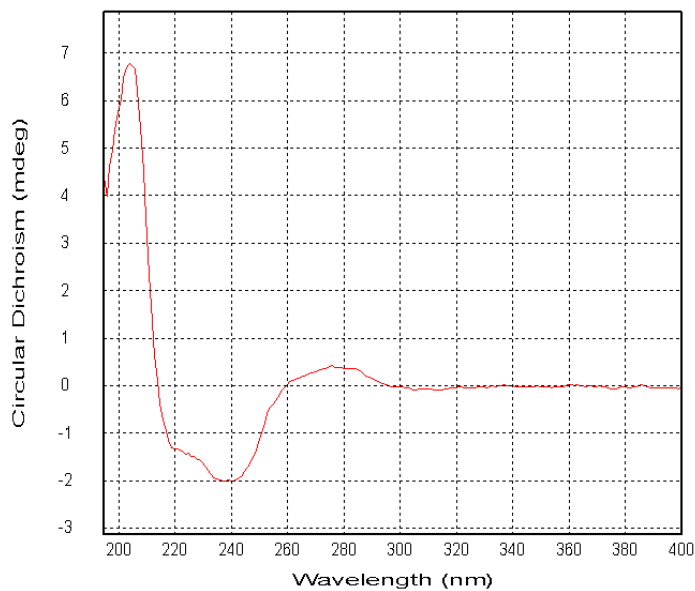

Figure S36. CD spectrum of arthrinin G (3).

| <u>n</u>    | <u>Average</u>   | <u>Std.Dev.</u> | <u>% RSD</u>  | <u>Maximum</u> | <u>Minimum</u> |               |              |                     |          |  |
|-------------|------------------|-----------------|---------------|----------------|----------------|---------------|--------------|---------------------|----------|--|
| 5           | 12.55            | 0.41            | 3.26          | 12.73          | 11.82          |               |              |                     |          |  |
| <u>S.No</u> | <u>Sample ID</u> | <u>Time</u>     | <u>Result</u> | <u>Scale</u>   | <u>OR °Arc</u> | <u>WLG.nm</u> | <u>Lg.mm</u> | <u>Conc.g/100ml</u> | <u>I</u> |  |
| 1           | SHSJ05           | 04:18:26 PM     | 11.82         | SR             | 0.013          | 589           | 100.00       | 0.110               | 2:       |  |
| 2           | SHSJ05           | 04:18:32 PM     | 12.73         | SR             | 0.014          | 589           | 100.00       | 0.110               | 2:       |  |
| 3           | SHSJ05           | 04:18:37 PM     | 12.73         | SR             | 0.014          | 589           | 100.00       | 0.110               | 2:       |  |
| 4           | SHSJ05           | 04:18:43 PM     | 12.73         | SR             | 0.014          | 589           | 100.00       | 0.110               | 2:       |  |
| 5           | SHSJ05           | 04:18:49 PM     | 12.73         | SR             | 0.014          | 589           | 100.00       | 0.110               | 2:       |  |

Figure S37. OR report of arthrinin G (3).

Sample Group Info.  
 Acquisition SW 6200 series TOF/6500 series  
 Version Q-TOF B.05.01 (B5125.2)

User Spectra

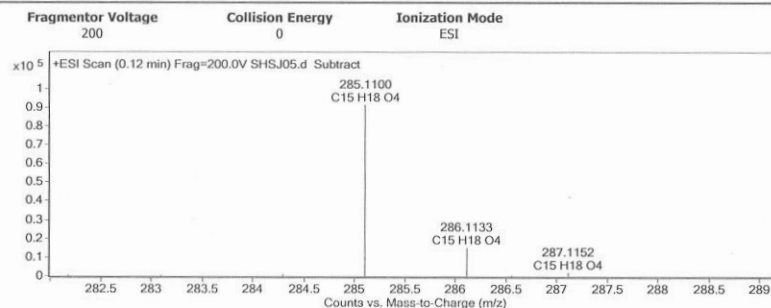

Peak List

| m/z      | z | Abund    | Formula    | Ion     |
|----------|---|----------|------------|---------|
| 263.1275 | 1 | 49214.64 |            |         |
| 285.11   | 1 | 91415.52 | C15 H18 O4 | (M+Na)+ |
| 286.1133 | 1 | 15192.29 | C15 H18 O4 | (M+Na)+ |
| 311.183  | 1 | 14938.17 |            |         |
| 320.1473 | 1 | 38863.32 |            |         |
| 326.1368 | 1 | 18726.91 |            |         |
| 333.131  | 1 | 65233.94 |            |         |
| 405.1888 | 1 | 27077.16 |            |         |
| 547.2306 | 1 | 65405.82 |            |         |
| 548.2337 | 1 | 21594.29 |            |         |

Formula Calculator Element Limits

| Element | Min | Max   |
|---------|-----|-------|
| C       |     | 3 60  |
| H       |     | 0 120 |
| O       |     | 0 30  |

Formula Calculator Results

| Formula    | CalculatedMass | CalculatedMz | Mz       | Diff. (mDa) | Diff. (ppm) | DBE    |
|------------|----------------|--------------|----------|-------------|-------------|--------|
| C15 H18 O4 | 262.1205       | 285.1097     | 285.1100 | -0.30       | -1.05       | 7.0000 |

Figure S38. HRESIMS spectrum of arthrinin G (3)

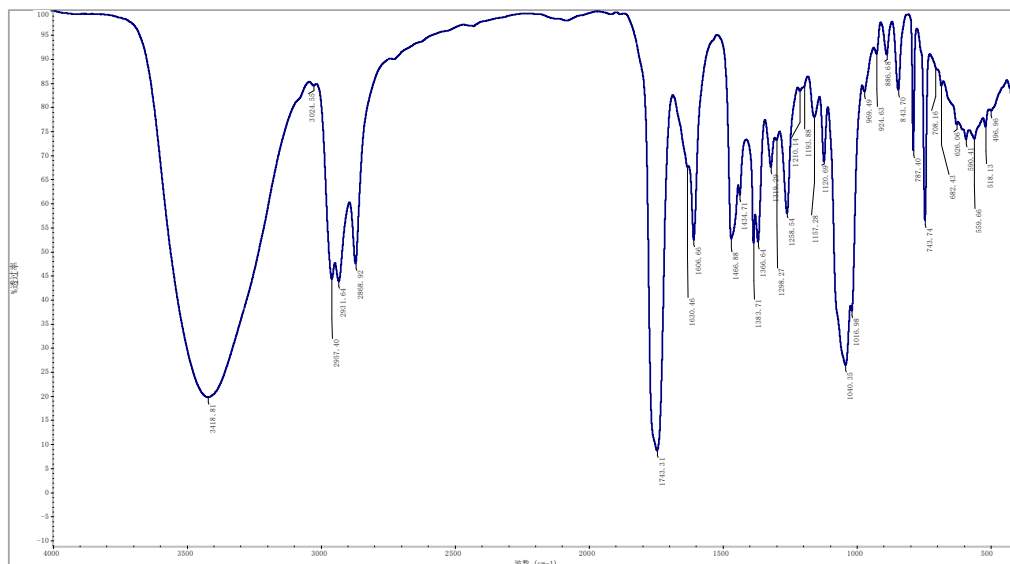

Figure S39. IR spectrum of arthrinin G (3).

**Table S6.** Conformational analysis of the B3LYP-D3BJ-SCRF/6-31G(d) optimized conformers of (1*R*\*, 2*R*\*, 4*S*\*, 5*S*\*)-2 in MeOH with SMD solvent model (T=298.15 K)

| Conformer | E (Hartree) <sup>a</sup> | C (Hartree) <sup>b</sup> | G (kcal/mol) <sup>c</sup> | ΔG (kcal/mol) <sup>d</sup> | Population <sup>e</sup> |
|-----------|--------------------------|--------------------------|---------------------------|----------------------------|-------------------------|
| <b>2a</b> | -773.934134              | 0.32164                  | -485441.839992            | 0.0                        | 45.55%                  |
| <b>2b</b> | -773.934967              | 0.322714                 | -485441.688598            | 0.151394                   | 35.27%                  |
| <b>2c</b> | -773.934926              | 0.324232                 | -485440.710641            | 1.129351                   | 6.76%                   |
| <b>2d</b> | -773.934922              | 0.324409                 | -485440.596815            | 1.243177                   | 5.58%                   |
| <b>2e</b> | -773.935178              | 0.324937                 | -485440.426218            | 1.413774                   | 4.18%                   |
| <b>2f</b> | -773.934036              | 0.324222                 | -485440.158294            | 1.681697                   | 2.66%                   |

<sup>a</sup> Electronic energy obtained at B3LYP-D3BJ-SCRF/6-311+G(d,p) level of theory;

<sup>b</sup> Thermal correction to Gibbs free energy obtained at B3LYP-D3BJ-SCRF/6-31G(d) level of theory; <sup>c</sup> Gibbs free energy (E + C);

<sup>d</sup> The relative Gibbs free energy;

<sup>e</sup> The Boltzmann distribution of each conformer.

**Table S7.** Cartesian coordinates (Å) of **2a** obtained at the B3LYP-D3BJ-SCRF/6-31G(d) level of theory in MeOH with SMD solvent model.

|   |           |           |           |   |           |           |           |
|---|-----------|-----------|-----------|---|-----------|-----------|-----------|
| C | -1.554525 | 0.699587  | -0.133616 | H | 0.057635  | -1.985604 | -1.419080 |
| C | -2.199237 | -0.497909 | -0.880617 | H | -1.734222 | 1.603698  | -0.728172 |
| C | -1.750272 | -1.843215 | -0.286815 | H | 3.054752  | 1.152736  | -0.311632 |
| C | -0.232694 | -2.008183 | -0.364431 | H | 2.535015  | 1.067873  | 1.368585  |
| C | 0.474178  | -0.881331 | 0.395176  | H | 2.612896  | -2.603413 | 1.172801  |
| C | 2.024585  | -0.740034 | 0.208740  | H | 3.882978  | -1.365156 | 1.163083  |
| C | 2.249610  | 0.793742  | 0.340947  | H | 2.512873  | -1.221646 | 2.279227  |
| C | 0.910995  | 1.408576  | 0.001868  | H | 1.939284  | -0.626940 | -1.975898 |
| C | -0.071461 | 0.489716  | 0.028080  | H | 3.543974  | -0.986938 | -1.318629 |
| C | -2.191308 | 0.964094  | 1.248726  | H | 2.305676  | -2.250562 | -1.356817 |
| C | -3.725272 | -0.398840 | -0.965412 | H | -3.251329 | 1.202636  | 1.134212  |
| C | 2.802569  | -1.528179 | 1.266492  | H | -2.111080 | 0.076393  | 1.891181  |
| C | 2.471927  | -1.180604 | -1.193419 | H | -0.659860 | 1.920473  | 1.975313  |
| C | 0.793484  | 2.871433  | -0.297297 | H | -4.200548 | -0.558925 | 0.009348  |
| O | 0.184810  | -3.303896 | 0.096413  | H | -4.041188 | 0.583786  | -1.337224 |
| O | -1.613282 | 2.100090  | 1.896652  | H | -4.118667 | -1.158706 | -1.650908 |
| O | 1.593064  | 3.247834  | -1.435138 | H | -0.018949 | -3.346565 | 1.047012  |
| H | 0.263890  | -1.064004 | 1.463978  | H | -0.251412 | 3.168918  | -0.445291 |
| H | -1.807997 | -0.456125 | -1.907679 | H | 1.190346  | 3.465356  | 0.534801  |
| H | -2.224060 | -2.667432 | -0.834273 | H | 1.260326  | 2.731511  | -2.188858 |



|   |           |           |          |   |   |   |   |
|---|-----------|-----------|----------|---|---|---|---|
| H | -2.072542 | -1.926695 | 0.760976 | - | - | - | - |
|---|-----------|-----------|----------|---|---|---|---|

**Table S8.** Cartesian coordinates (Å) of **2b** obtained at the B3LYP-D3BJ-SCRF/6-31G(d) level of theory in MeOH with SMD solvent model.

|   |           |           |           |   |           |           |           |
|---|-----------|-----------|-----------|---|-----------|-----------|-----------|
| C | -1.586975 | -0.320533 | -0.301889 | H | 1.298785  | -1.881102 | -1.143997 |
| C | -1.427040 | -1.797583 | -0.754389 | H | -2.229325 | 0.185202  | -1.033990 |
| C | -0.346162 | -2.516255 | 0.068860  | H | 2.036300  | 2.509940  | -0.968261 |
| C | 1.014593  | -1.836160 | -0.083981 | H | 1.518981  | 2.550688  | 0.713185  |
| C | 0.944533  | -0.378203 | 0.367023  | H | 3.981007  | 1.299882  | 1.010395  |
| C | 2.172792  | 0.546190  | 0.053279  | H | 2.675293  | 0.909534  | 2.143941  |
| C | 1.508624  | 1.931830  | -0.197330 | H | 3.615871  | -0.392446 | 1.393768  |
| C | 0.081862  | 1.612445  | -0.574991 | H | 3.706630  | 0.817857  | -1.457106 |
| C | -0.237639 | 0.350181  | -0.249748 | H | 3.347955  | -0.883086 | -1.120758 |
| C | -2.296509 | -0.179942 | 1.053971  | H | 2.219895  | 0.090324  | -2.087463 |
| C | -2.742284 | -2.582177 | -0.771752 | H | -3.216633 | -0.774780 | 1.065970  |
| C | 3.167912  | 0.591876  | 1.216789  | H | -1.653582 | -0.528039 | 1.871036  |
| C | 2.900343  | 0.110801  | -1.228004 | H | -2.928617 | 1.309653  | 2.172033  |
| C | -0.866835 | 2.675664  | -1.042615 | H | -3.095673 | -2.815253 | 0.239168  |
| O | 2.022629  | -2.489290 | 0.705739  | H | -3.533826 | -2.022693 | -1.285569 |
| O | -2.636912 | 1.203905  | 1.251980  | H | -2.608571 | -3.534239 | -1.298821 |
| O | -1.379140 | 3.431844  | 0.069879  | H | 2.105917  | -3.398814 | 0.372791  |
| H | 0.800700  | -0.411761 | 1.460351  | H | -0.356475 | 3.397427  | -1.689787 |
| H | -1.061665 | -1.746242 | -1.790248 | H | -1.694038 | 2.238763  | -1.619504 |
| H | -0.263341 | -3.559975 | -0.263702 | H | -1.820142 | 2.758375  | 0.632392  |
| H | -0.621345 | -2.539682 | 1.132051  | - | -         | -         | -         |

**Table S9.** Key transitions, oscillator strengths, and rotatory strengths in the ECD spectrum of conformer (1*R*, 2*R*, 4*S*, 5*S*)-**2a** at the CAM-B3LYP-SCRF/def2-SVP level of theory in MeOH with SMD solvent model.

| Num <sup>a</sup> | Transition <sup>b</sup> | CI-coeff <sup>c</sup> | ΔE (eV) <sup>d</sup> | λ (nm) <sup>e</sup> | f <sup>f</sup> | R <sub>vel</sub> <sup>g</sup> | R <sub>len</sub> <sup>h</sup> |
|------------------|-------------------------|-----------------------|----------------------|---------------------|----------------|-------------------------------|-------------------------------|
| 1                | 66->67                  | 0.69898               | 6.4549               | 192.08              | 0.4435         | 21.2461                       | 22.3192                       |
| 2                | 63->67                  | -0.43662              | 7.1246               | 174.02              | 0.0080         | -3.3436                       | -9.5176                       |
|                  | 64->67                  | 0.5033                |                      |                     |                |                               |                               |
| 3                | 66->68                  | 0.6415                | 7.3969               | 167.62              | 0.0134         | 3.4553                        | 6.2095                        |
| 4                | 65->67                  | 0.62924               | 7.5889               | 163.38              | 0.0035         | -4.5174                       | -3.5602                       |
| 5                | 66->69                  | 0.62741               | 7.7636               | 159.70              | 0.0388         | -55.0972                      | -55.4109                      |
| 6                | 63->67                  | 0.51702               | 7.7820               | 159.32              | 0.0175         | 5.3234                        | 5.4209                        |
|                  | 64->67                  | 0.44667               |                      |                     |                |                               |                               |
| 7                | 62->67                  | 0.61815               | 7.8927               | 157.09              | 0.0097         | 33.6284                       | 38.4606                       |
| 8                | 65->68                  | 0.26302               | 8.0670               | 153.69              | 0.0047         | 4.4293                        | 3.0968                        |
|                  | 65->69                  | -0.22886              |                      |                     |                |                               |                               |

|    |        |          |        |        |        |          |          |
|----|--------|----------|--------|--------|--------|----------|----------|
|    | 66->71 | -0.25786 |        |        |        |          |          |
| 9  | 56->67 | 0.23836  | 8.2123 | 150.97 | 0.0063 | 35.9523  | 28.8258  |
|    | 57->67 | 0.25571  |        |        |        |          |          |
|    | 59->67 | 0.33868  |        |        |        |          |          |
|    | 61->67 | -0.22913 |        |        |        |          |          |
| 10 | 63->68 | 0.26746  | 8.2716 | 149.89 | 0.0032 | -7.3463  | -7.7196  |
|    | 64->68 | 0.33682  |        |        |        |          |          |
| 11 | 58->67 | 0.27857  | 8.3674 | 148.18 | 0.0008 | -15.7591 | -9.3366  |
|    | 59->67 | 0.24784  |        |        |        |          |          |
|    | 64->69 | 0.23495  |        |        |        |          |          |
| 12 | 66->70 | 0.56412  | 8.4282 | 147.11 | 0.0057 | -11.8385 | -28.5102 |
| 13 | 66->71 | 0.5287   | 8.5098 | 145.70 | 0.0124 | 8.3824   | 8.7162   |
|    | 66->73 | -0.24402 |        |        |        |          |          |
| 14 | 60->67 | -0.29988 | 8.6665 | 143.06 | 0.0049 | -4.2685  | -1.8769  |
|    | 61->67 | 0.43866  |        |        |        |          |          |
| 15 | 66->72 | 0.52452  | 8.7696 | 141.38 | 0.0179 | 5.4326   | 5.2356   |
| 16 | 66->73 | 0.56136  | 8.8422 | 140.22 | 0.0151 | 26.4489  | 24.9091  |
| 17 | 58->67 | 0.23758  | 8.8827 | 139.58 | 0.0641 | -17.39   | -17.4392 |
|    | 60->67 | 0.53812  |        |        |        |          |          |
| 18 | 58->67 | 0.46965  | 8.9392 | 138.70 | 0.0020 | -4.089   | -2.4803  |
|    | 61->67 | -0.2797  |        |        |        |          |          |
| 19 | 65->68 | 0.27407  | 9.0000 | 137.76 | 0.0055 | 17.7371  | 17.2238  |
|    | 65->69 | 0.40972  |        |        |        |          |          |
|    | 66->72 | 0.3066   |        |        |        |          |          |
| 20 | 55->67 | 0.38986  | 9.1045 | 136.18 | 0.0081 | 13.1156  | 15.48    |
|    | 56->67 | -0.28149 |        |        |        |          |          |
| 21 | 55->67 | -0.23746 | 9.1268 | 135.85 | 0.0081 | 20.1441  | 24.0625  |
|    | 64->68 | 0.23903  |        |        |        |          |          |
|    | 65->68 | 0.26387  |        |        |        |          |          |
|    | 66->74 | -0.26084 |        |        |        |          |          |
| 22 | 63->68 | 0.28353  | 9.1924 | 134.88 | 0.0183 | 25.2529  | 27.2204  |
|    | 64->69 | 0.30057  |        |        |        |          |          |
|    | 66->75 | -0.2808  |        |        |        |          |          |
| 23 | 63->69 | 0.26602  | 9.2053 | 134.69 | 0.0020 | -3.3024  | 2.5784   |
|    | 65->71 | 0.23884  |        |        |        |          |          |
| 24 | 66->75 | 0.46677  | 9.2356 | 134.25 | 0.0402 | -44.798  | -44.0284 |
| 25 | 56->67 | -0.26661 | 9.2670 | 133.79 | 0.0115 | -17.4674 | -17.4577 |
|    | 57->67 | -0.34192 |        |        |        |          |          |
|    | 59->67 | 0.40631  |        |        |        |          |          |
| 26 | 65->70 | -0.25099 | 9.2879 | 133.49 | 0.0249 | 6.1903   | 4.732    |

|    |        |          |        |        |        |          |         |
|----|--------|----------|--------|--------|--------|----------|---------|
|    | 66->74 | 0.34743  |        |        |        |          |         |
| 27 | 63->69 | 0.26549  | 9.3125 | 133.14 | 0.0068 | 8.7549   | 13.2764 |
|    | 64->69 | 0.24523  |        |        |        |          |         |
|    | 65->70 | 0.30146  |        |        |        |          |         |
|    |        |          |        |        |        |          |         |
| 28 | 55->67 | 0.28566  | 9.4117 | 131.73 | 0.0094 | 8.9253   | 10.7588 |
|    | 56->67 | 0.26288  |        |        |        |          |         |
|    | 57->67 | -0.27813 |        |        |        |          |         |
|    | 62->68 | 0.24067  |        |        |        |          |         |
|    | 64->70 | -0.26525 |        |        |        |          |         |
| 29 | 55->67 | 0.26625  | 9.4272 | 131.52 | 0.0166 | -25.9594 | -27.461 |
|    | 56->67 | 0.25827  |        |        |        |          |         |
|    | 64->70 | 0.29192  |        |        |        |          |         |
| 30 | 62->68 | 0.41981  | 9.5447 | 129.90 | 0.0420 | 48.552   | 42.9175 |
|    | 62->69 | -0.27121 |        |        |        |          |         |

<sup>a</sup> Number of the excited states; <sup>b</sup> Only transitions with contribution over 10.0% were listed;

<sup>c</sup> Configuration-interaction coefficient; <sup>d</sup> Excitation energy; <sup>e</sup> Wavelength; <sup>f</sup> Oscillator strength; <sup>g</sup> Rotatory strength in length form ( $10^{-40}$  cgs); <sup>h</sup> Rotatory strength in velocity form ( $10^{-40}$  cgs).

**Table S10.** Key transitions, oscillator strengths, and rotatory strengths in the ECD spectrum of conformer (1R, 2R, 4S, 5S)-**2b** at the CAM-B3LYP-SCRF/def2-SVP level of theory in MeOH with SMD solvent model.

| Num <sup>a</sup> | Transition <sup>b</sup> | CI-coeff <sup>c</sup> | $\Delta E$ (eV) <sup>d</sup> | $\lambda$ (nm) <sup>e</sup> | f <sup>f</sup> | R <sub>vel</sub> <sup>g</sup> | R <sub>len</sub> <sup>h</sup> |
|------------------|-------------------------|-----------------------|------------------------------|-----------------------------|----------------|-------------------------------|-------------------------------|
| 1                | 66->67                  | 0.69748               | 6.5024                       | 190.67                      | 0.4158         | 28.7686                       | 32.7882                       |
| 2                | 64->67                  | -0.29407              | 7.0828                       | 175.05                      | 0.0119         | -25.717                       | -21.8508                      |
|                  | 65->67                  | 0.6145                |                              |                             |                |                               |                               |
| 3                | 66->68                  | 0.52826               | 7.7632                       | 159.71                      | 0.0247         | -0.7411                       | 0.3094                        |
|                  | 66->69                  | 0.39504               |                              |                             |                |                               |                               |
| 4                | 62->67                  | 0.24372               | 7.8128                       | 158.69                      | 0.0018         | -8.5608                       | -7.4167                       |
|                  | 63->67                  | 0.41739               |                              |                             |                |                               |                               |
|                  | 64->67                  | 0.40332               |                              |                             |                |                               |                               |
| 5                | 66->68                  | -0.34027              | 7.8646                       | 157.65                      | 0.0084         | -17.707                       | -18.3355                      |
|                  | 66->69                  | 0.53972               |                              |                             |                |                               |                               |
|                  | 66->71                  | -0.22885              |                              |                             |                |                               |                               |
| 6                | 61->67                  | 0.46685               | 7.9549                       | 155.86                      | 0.0078         | 30.9383                       | 29.9705                       |
|                  | 63->67                  | -0.32022              |                              |                             |                |                               |                               |
|                  | 64->67                  | 0.27505               |                              |                             |                |                               |                               |
| 7                | 64->68                  | 0.36128               | 8.0515                       | 153.99                      | 0.0096         | 6.2912                        | 27.8722                       |
|                  | 64->71                  | -0.28529              |                              |                             |                |                               |                               |
|                  | 65->68                  | 0.21789               |                              |                             |                |                               |                               |
| 8                | 61->67                  | -0.3061               | 8.1050                       | 152.97                      | 0.0034         | 8.5324                        | -2.7092                       |

|    |        |          |        |        |        |          |          |
|----|--------|----------|--------|--------|--------|----------|----------|
|    | 63->69 | 0.36094  |        |        |        |          |          |
| 9  | 61->67 | 0.22305  | 8.1517 | 152.10 | 0.0072 | -1.9317  | 16.98    |
|    | 63->67 | 0.26109  |        |        |        |          |          |
|    | 63->69 | 0.40515  |        |        |        |          |          |
| 10 | 66->70 | 0.58456  | 8.3653 | 148.21 | 0.0081 | 3.1405   | 4.4764   |
|    | 66->72 | -0.2653  |        |        |        |          |          |
| 11 | 62->67 | 0.24236  | 8.4848 | 146.13 | 0.0122 | -2.2965  | -5.2042  |
|    | 66->71 | 0.44336  |        |        |        |          |          |
|    | 66->72 | -0.23445 |        |        |        |          |          |
| 12 | 62->67 | 0.49652  | 8.5222 | 145.48 | 0.0014 | -4.3322  | -4.9824  |
|    | 64->67 | -0.21705 |        |        |        |          |          |
|    | 66->71 | -0.23557 |        |        |        |          |          |
| 13 | 56->67 | -0.23935 | 8.5698 | 144.68 | 0.0073 | -1.0272  | -1.7964  |
|    | 59->67 | -0.27924 |        |        |        |          |          |
|    | 66->72 | 0.36811  |        |        |        |          |          |
| 14 | 56->67 | 0.27099  | 8.6027 | 144.12 | 0.0288 | 29.6694  | 32.5035  |
|    | 59->67 | 0.31967  |        |        |        |          |          |
|    | 63->67 | 0.21919  |        |        |        |          |          |
|    | 66->72 | 0.34844  |        |        |        |          |          |
| 15 | 56->67 | 0.30678  | 8.7227 | 142.14 | 0.0062 | -16.9215 | -19.2292 |
|    | 58->67 | 0.3658   |        |        |        |          |          |
|    | 59->67 | -0.25812 |        |        |        |          |          |
| 16 | 60->67 | -0.32238 | 8.8779 | 139.65 | 0.0039 | -17.5155 | -12.786  |
|    | 65->68 | 0.22817  |        |        |        |          |          |
|    | 66->73 | 0.33919  |        |        |        |          |          |
| 17 | 60->67 | 0.31205  | 8.8840 | 139.56 | 0.0130 | -4.6921  | -4.6448  |
|    | 66->73 | 0.46681  |        |        |        |          |          |
| 18 | 58->67 | -0.21601 | 8.9214 | 138.97 | 0.0100 | 6.3945   | 7.4684   |
|    | 60->67 | 0.46986  |        |        |        |          |          |
| 19 | 66->71 | 0.2319   | 9.0246 | 137.38 | 0.0043 | 1.3981   | 2.6957   |
|    | 66->73 | 0.27171  |        |        |        |          |          |
|    | 66->74 | 0.50814  |        |        |        |          |          |
| 20 | 55->67 | 0.21303  | 9.0994 | 136.25 | 0.0164 | 4.8322   | 7.8352   |
|    | 56->67 | -0.23026 |        |        |        |          |          |
|    | 58->67 | 0.36129  |        |        |        |          |          |
|    | 59->67 | 0.3777   |        |        |        |          |          |
| 21 | 65->68 | -0.21875 | 9.1422 | 135.62 | 0.0097 | 0.995    | -12.5654 |
|    | 65->69 | 0.42754  |        |        |        |          |          |
| 22 | 64->68 | 0.32751  | 9.2443 | 134.12 | 0.0664 | 15.3327  | 17.8446  |
|    | 64->70 | 0.26164  |        |        |        |          |          |

|    |        |          |        |        |        |          |          |
|----|--------|----------|--------|--------|--------|----------|----------|
|    | 65->69 | 0.24426  |        |        |        |          |          |
| 23 | 66->75 | 0.43187  | 9.2607 | 133.88 | 0.0342 | -56.7389 | -57.701  |
|    | 66->76 | -0.29981 |        |        |        |          |          |
| 24 | 64->69 | 0.45153  | 9.2837 | 133.55 | 0.0403 | -48.9783 | -49.2497 |
|    | 66->75 | 0.24804  |        |        |        |          |          |
| 25 | 55->67 | -0.26277 | 9.3241 | 132.97 | 0.0041 | 16.2571  | 12.0476  |
|    | 57->67 | 0.49717  |        |        |        |          |          |
| 26 | 63->68 | 0.39456  | 9.3844 | 132.12 | 0.0101 | -4.833   | -1.5909  |
|    | 63->70 | 0.3202   |        |        |        |          |          |
| 27 | 62->68 | 0.30335  | 9.4356 | 131.40 | 0.0659 | 35.2476  | 28.662   |
|    | 63->70 | -0.24962 |        |        |        |          |          |
|    | 65->70 | -0.29891 |        |        |        |          |          |
| 28 | 66->75 | 0.30655  | 9.5060 | 130.43 | 0.0042 | 12.5287  | 11.8301  |
|    | 66->76 | 0.44874  |        |        |        |          |          |
| 29 | 62->68 | 0.21465  | 9.5789 | 129.43 | 0.0041 | 5.4779   | 3.0115   |
| 30 | 55->67 | 0.51979  | 9.6146 | 128.95 | 0.0153 | -10.3941 | -8.965   |
|    | 56->67 | 0.23554  |        |        |        |          |          |
|    | 57->67 | 0.26269  |        |        |        |          |          |

<sup>a</sup> Number of the excited states; <sup>b</sup> Only transitions with contribution over 10.0% were listed;

<sup>c</sup> Configuration-interaction coefficient; <sup>d</sup> Excitation energy; <sup>e</sup> Wavelength; <sup>f</sup> Oscillator strength; <sup>g</sup> Rotatory strength in length form ( $10^{-40}$  cgs); <sup>h</sup> Rotatory strength in velocity form ( $10^{-40}$  cgs).

**Table S11.** Conformational analysis of the B3LYP-D3BJ-SCRF/6-31G(d) optimized conformers of (6*R*\*, 8*S*\*)-3 in MeOH with SMD solvent model (T=298.15 K)

| Conformer | E (Hartree) <sup>a</sup> | C (Hartree) <sup>b</sup> | G (kcal/mol) <sup>c</sup> | $\Delta G$ (kcal/mol) <sup>d</sup> | Population <sup>e</sup> |
|-----------|--------------------------|--------------------------|---------------------------|------------------------------------|-------------------------|
| <b>3a</b> | -883.707001              | 0.264403                 | -554360.230552            | 0.0                                | 31.30%                  |
| <b>3b</b> | -883.708058              | 0.265711                 | -554360.072931            | 0.157622                           | 23.98%                  |
| <b>3c</b> | -883.705846              | 0.263837                 | -554359.86093             | 0.369623                           | 16.77%                  |
| <b>3d</b> | -883.708595              | 0.267049                 | -554359.56994             | 0.660613                           | 10.26%                  |
| <b>3e</b> | -883.705364              | 0.264228                 | -554359.312913            | 0.917639                           | 6.64%                   |
| <b>3f</b> | -883.705294              | 0.264673                 | -554358.989848            | 1.240705                           | 3.85%                   |
| <b>3g</b> | -883.705723              | 0.26514                  | -554358.965883            | 1.26467                            | 3.70%                   |
| <b>3h</b> | -883.706072              | 0.265539                 | -554358.934423            | 1.296129                           | 3.51%                   |

<sup>a</sup> Electronic energy obtained at B3LYP-D3BJ-SCRF/6-311+G(d,p) level of theory;

<sup>b</sup> Thermal correction to Gibbs free energy obtained at B3LYP-D3BJ-SCRF/6-31G(d) level of theory; <sup>c</sup> Gibbs free energy (E + C);

<sup>d</sup> The relative Gibbs free energy;

<sup>e</sup> The Boltzmann distribution of each conformer.

**Table S12.** Cartesian coordinates (Å) of **3a** obtained at the B3LYP-D3BJ-SCRF/6-31G(d) level of theory in MeOH with SMD solvent model.

|   |           |           |           |   |           |           |           |
|---|-----------|-----------|-----------|---|-----------|-----------|-----------|
| C | -1.359194 | 0.318129  | -0.150472 | H | 1.642075  | -1.402853 | 2.121074  |
| C | -2.051215 | -0.890016 | -0.041434 | H | 4.018410  | -1.337002 | 0.589576  |
| C | -1.408609 | -2.128561 | -0.040817 | H | 2.807448  | -2.629162 | 0.513039  |
| C | -0.019253 | -2.140281 | -0.153384 | H | 2.433186  | -2.326954 | -1.913200 |
| C | 0.682069  | -0.930128 | -0.259092 | H | 2.135694  | -0.715038 | -2.588177 |
| C | 2.186767  | -0.761023 | -0.405680 | H | 3.726327  | -1.108949 | -1.907742 |
| C | 2.382490  | 0.772113  | -0.232737 | H | 0.098048  | 1.448206  | 2.061658  |
| C | 1.003363  | 1.464823  | -0.429502 | H | -0.155890 | 3.103895  | 0.413280  |
| C | 0.028323  | 0.309945  | -0.261433 | H | 1.597126  | 3.300917  | 0.539074  |
| C | -2.365426 | 1.432371  | -0.105221 | H | 1.045947  | 1.341352  | -2.609384 |
| C | -3.484571 | -0.594066 | 0.061956  | H | -0.153552 | 2.485321  | -1.980932 |
| C | 2.947783  | -1.550411 | 0.674393  | H | 1.571147  | 2.907388  | -1.960706 |
| C | 2.646664  | -1.259008 | -1.787346 | H | 3.132127  | 1.165144  | -0.926306 |
| C | 0.856150  | 2.086100  | -1.830034 | H | 2.728001  | 0.968198  | 0.785813  |
| C | 0.784290  | 2.571350  | 0.616957  | H | -2.249564 | 2.088577  | 0.762206  |
| O | -3.647733 | 0.761319  | 0.017911  | H | -2.389750 | 2.041403  | -1.013368 |
| O | 0.812243  | 2.100933  | 1.964323  | H | -1.979840 | -3.047816 | 0.045758  |
| O | 2.585012  | -1.193153 | 2.008410  | H | 0.518009  | -3.084273 | -0.157511 |
| O | -4.437364 | -1.344896 | 0.170472  | - | -         | -         | -         |

**Table S13.** Cartesian coordinates (Å) of **3b** obtained at the B3LYP-D3BJ-SCRF/6-31G(d) level of theory in MeOH with SMD solvent model.

|   |           |           |           |   |           |           |           |
|---|-----------|-----------|-----------|---|-----------|-----------|-----------|
| C | -1.367035 | 0.335333  | -0.192935 | H | 2.978284  | -0.811923 | 2.695709  |
| C | -2.085415 | -0.850136 | -0.031370 | H | 3.932073  | -1.206410 | 0.713393  |
| C | -1.473135 | -2.105213 | -0.009628 | H | 2.677171  | -2.449833 | 0.920867  |
| C | -0.088684 | -2.152636 | -0.148686 | H | 3.744395  | -1.517295 | -1.768068 |
| C | 0.638282  | -0.963289 | -0.308881 | H | 2.462820  | -2.722628 | -1.532219 |
| C | 2.147344  | -0.847129 | -0.445590 | H | 2.175091  | -1.313502 | -2.570980 |
| C | 2.380974  | 0.683844  | -0.629162 | H | 1.585895  | 0.988305  | 1.941968  |
| C | 1.008447  | 1.426423  | -0.519401 | H | 0.077351  | 3.008936  | 0.647535  |
| C | 0.016529  | 0.290137  | -0.343580 | H | 1.845341  | 3.061039  | 0.610948  |
| C | -2.340694 | 1.476399  | -0.133489 | H | 0.758212  | 1.597280  | -2.677453 |
| C | -3.505027 | -0.514152 | 0.118723  | H | -0.255589 | 2.725364  | -1.756151 |
| C | 2.851480  | -1.370581 | 0.812221  | H | 1.482901  | 3.026650  | -1.917067 |
| C | 2.662574  | -1.651561 | -1.650461 | H | 2.828622  | 0.876655  | -1.608578 |
| C | 0.726794  | 2.241811  | -1.792445 | H | 3.086649  | 1.059377  | 0.118311  |
| C | 0.977858  | 2.385825  | 0.689355  | H | -2.167472 | 2.146336  | 0.713817  |
| O | -3.634702 | 0.844210  | 0.056064  | H | -2.389644 | 2.066817  | -1.052510 |

|   |           |           |          |   |           |           |           |
|---|-----------|-----------|----------|---|-----------|-----------|-----------|
| O | 0.947587  | 1.734653  | 1.953412 | H | -2.064089 | -3.006872 | 0.119561  |
| O | 2.349295  | -0.683851 | 1.967075 | H | 0.428716  | -3.107449 | -0.126536 |
| O | -4.473239 | -1.236424 | 0.278377 | - | -         | -         | -         |

**Table S14.** Cartesian coordinates (Å) of **3c** obtained at the @@@ level of theory in the gas phase.

|   |           |           |           |   |           |           |           |
|---|-----------|-----------|-----------|---|-----------|-----------|-----------|
| C | -1.352560 | 0.306188  | -0.163663 | H | 1.589798  | -1.324102 | 2.133652  |
| C | -2.043832 | -0.901891 | -0.057387 | H | 4.006631  | -1.332512 | 0.665729  |
| C | -1.399302 | -2.140132 | -0.057120 | H | 2.790350  | -2.619294 | 0.580677  |
| C | -0.009372 | -2.148748 | -0.160868 | H | 3.781732  | -1.113728 | -1.830907 |
| C | 0.690520  | -0.936788 | -0.263565 | H | 2.499411  | -2.342471 | -1.857319 |
| C | 2.198107  | -0.762003 | -0.376190 | H | 2.207864  | -0.742163 | -2.560664 |
| C | 2.381825  | 0.773537  | -0.206767 | H | 0.640108  | 2.778052  | 2.496540  |
| C | 1.003449  | 1.456058  | -0.447263 | H | -0.160760 | 3.134692  | 0.289502  |
| C | 0.033224  | 0.300026  | -0.274914 | H | 1.591187  | 3.298193  | 0.500806  |
| C | -2.353940 | 1.421485  | -0.094330 | H | -0.121900 | 2.413620  | -2.061270 |
| C | -3.476053 | -0.604849 | 0.055457  | H | 1.594967  | 2.864718  | -2.002596 |
| C | 2.933212  | -1.539122 | 0.731094  | H | 1.114103  | 1.272679  | -2.620118 |
| C | 2.700364  | -1.271230 | -1.738727 | H | 3.147808  | 1.167169  | -0.882054 |
| C | 0.888979  | 2.036097  | -1.869188 | H | 2.699195  | 0.976524  | 0.819536  |
| C | 0.754961  | 2.586816  | 0.555110  | H | -2.224063 | 2.055840  | 0.787509  |
| O | -3.637721 | 0.751497  | 0.026189  | H | -2.385187 | 2.049805  | -0.988899 |
| O | 0.643557  | 2.036420  | 1.869751  | H | -1.968760 | -3.060600 | 0.028295  |
| O | 2.545511  | -1.162611 | 2.052155  | H | 0.530255  | -3.091458 | -0.156567 |
| O | -4.430127 | -1.355010 | 0.160413  | - | -         | -         | -         |

**Table S15.** Cartesian coordinates (Å) of **3d** obtained at the @@@ level of theory in the gas phase.

|   |           |           |           |   |           |           |           |
|---|-----------|-----------|-----------|---|-----------|-----------|-----------|
| C | -1.370460 | 0.349545  | -0.184427 | H | 2.239515  | 0.073353  | 1.945242  |
| C | -2.090595 | -0.835496 | -0.022170 | H | 3.936641  | -1.180507 | 0.677639  |
| C | -1.480763 | -2.091433 | -0.000783 | H | 2.745561  | -2.484122 | 0.825379  |
| C | -0.097500 | -2.143161 | -0.148471 | H | 3.717364  | -1.522797 | -1.806306 |
| C | 0.632794  | -0.956331 | -0.309365 | H | 2.410847  | -2.705011 | -1.594343 |
| C | 2.138280  | -0.848007 | -0.466410 | H | 2.153450  | -1.268503 | -2.604352 |
| C | 2.375894  | 0.685146  | -0.646438 | H | 0.444608  | 1.164054  | 2.175775  |
| C | 1.014140  | 1.433982  | -0.499305 | H | 0.075965  | 2.919816  | 0.792754  |
| C | 0.014614  | 0.300510  | -0.331210 | H | 1.833950  | 3.081531  | 0.634729  |
| C | -2.349528 | 1.489141  | -0.156223 | H | -0.249371 | 2.813584  | -1.647175 |
| C | -3.511127 | -0.499967 | 0.118619  | H | 1.490759  | 3.047081  | -1.880506 |
| C | 2.860861  | -1.395124 | 0.781896  | H | 0.673224  | 1.666001  | -2.637516 |
| C | 2.632646  | -1.636057 | -1.690514 | H | 2.798425  | 0.879537  | -1.636604 |
| C | 0.709200  | 2.290966  | -1.738914 | H | 3.104505  | 1.058162  | 0.080876  |

|   |           |           |          |   |           |           |           |
|---|-----------|-----------|----------|---|-----------|-----------|-----------|
| C | 1.017377  | 2.359658  | 0.731949 | H | -2.189011 | 2.186228  | 0.671249  |
| O | -3.642163 | 0.857423  | 0.040367 | H | -2.393170 | 2.051920  | -1.092814 |
| O | 1.247549  | 1.673487  | 1.969400 | H | -2.073884 | -2.991513 | 0.129611  |
| O | 2.359434  | -0.897771 | 2.016614 | H | 0.416798  | -3.099684 | -0.133838 |
| O | -4.478715 | -1.221809 | 0.282467 | - | -         | -         | -         |

**Table S16.** Key transitions, oscillator strengths, and rotatory strengths in the ECD spectrum of conformer (6*R*, 8*S*)-**3a** at the CAM-B3LYP-SCRF/def2-SVP level of theory in MeOH with SMD solvent model.

| Num <sup>a</sup> | Transition <sup>b</sup> | CI-coeff <sup>c</sup> | $\Delta E$ (eV) <sup>d</sup> | $\lambda$ (nm) <sup>e</sup> | $f^f$  | $R_{\text{vel}}^g$ | $R_{\text{len}}^h$ |
|------------------|-------------------------|-----------------------|------------------------------|-----------------------------|--------|--------------------|--------------------|
| 1                | 69->71                  | 0.44924               | 5.0511                       | 245.46                      | 0.0293 | -0.2471            | -0.2749            |
|                  | 70->71                  | -0.38867              |                              |                             |        |                    |                    |
|                  | 70->72                  | 0.2984                |                              |                             |        |                    |                    |
| 2                | 66->71                  | -0.38913              | 5.4038                       | 229.44                      | 0.1698 | 89.9904            | 98.2998            |
|                  | 69->71                  | 0.32332               |                              |                             |        |                    |                    |
|                  | 70->71                  | 0.41611               |                              |                             |        |                    |                    |
| 3                | 66->71                  | 0.50856               | 5.4222                       | 228.66                      | 0.1058 | -90.6629           | -99.1723           |
|                  | 69->71                  | 0.2421                |                              |                             |        |                    |                    |
|                  | 70->71                  | 0.32799               |                              |                             |        |                    |                    |
| 4                | 69->71                  | -0.34877              | 6.2973                       | 196.89                      | 0.5917 | -24.9166           | -25.272            |
|                  | 70->72                  | 0.58209               |                              |                             |        |                    |                    |
| 5                | 68->71                  | 0.66752               | 6.4530                       | 192.13                      | 0.0578 | 33.2378            | 35.0552            |
| 6                | 69->72                  | 0.64981               | 6.4720                       | 191.57                      | 0.5045 | -2.8649            | -1.7009            |
|                  | 70->71                  | 0.22496               |                              |                             |        |                    |                    |
| 7                | 67->71                  | 0.54184               | 6.8332                       | 181.44                      | 0.0123 | -3.3437            | -1.8281            |
| 8                | 64->71                  | 0.26626               | 7.0456                       | 175.97                      | 0.0433 | -13.5175           | -14.3769           |
|                  | 65->71                  | 0.58822               |                              |                             |        |                    |                    |
| 9                | 68->72                  | 0.67556               | 7.0697                       | 175.37                      | 0.0231 | -8.1471            | -8.7024            |
| 10               | 62->71                  | -0.33774              | 7.1018                       | 174.58                      | 0.0091 | 4.473              | 4.1523             |
|                  | 65->71                  | -0.28162              |                              |                             |        |                    |                    |
|                  | 67->71                  | 0.36742               |                              |                             |        |                    |                    |
| 11               | 60->71                  | 0.29987               | 7.2363                       | 171.34                      | 0.0045 | -4.8565            | -5.6086            |
|                  | 63->71                  | 0.44451               |                              |                             |        |                    |                    |
|                  | 64->71                  | -0.34463              |                              |                             |        |                    |                    |
| 12               | 66->72                  | 0.60329               | 7.3092                       | 169.63                      | 0.0058 | -12.9346           | -13.5471           |
| 13               | 67->72                  | 0.62172               | 7.4794                       | 165.77                      | 0.0065 | -3.2265            | -4.2988            |
| 14               | 62->71                  | 0.36415               | 7.6141                       | 162.84                      | 0.0063 | 4.6623             | 4.8702             |
|                  | 64->71                  | 0.39496               |                              |                             |        |                    |                    |
| 15               | 62->72                  | -0.38137              | 7.7964                       | 159.03                      | 0.0024 | -2.5598            | -1.27              |
|                  | 64->72                  | 0.40453               |                              |                             |        |                    |                    |
|                  | 67->72                  | 0.24256               |                              |                             |        |                    |                    |



|    |        |          |        |        |        |          |          |
|----|--------|----------|--------|--------|--------|----------|----------|
| 16 | 60->71 | -0.2603  | 7.9479 | 156.00 | 0.0058 | 2.4577   | 1.6072   |
|    | 61->71 | 0.49434  |        |        |        |          |          |
|    | 62->71 | -0.24483 |        |        |        |          |          |
|    | 63->71 | 0.2533   |        |        |        |          |          |
| 17 | 55->71 | -0.26521 | 8.0086 | 154.81 | 0.0017 | -0.8297  | -2.2328  |
|    | 61->71 | 0.22841  |        |        |        |          |          |
|    | 63->72 | 0.34162  |        |        |        |          |          |
| 18 | 55->71 | 0.28969  | 8.0539 | 153.94 | 0.0101 | -1.59    | -2.2     |
|    | 63->72 | 0.27494  |        |        |        |          |          |
|    | 65->72 | 0.23516  |        |        |        |          |          |
| 19 | 65->72 | -0.32993 | 8.1095 | 152.89 | 0.0235 | 14.4789  | 18.4607  |
|    | 68->73 | -0.23939 |        |        |        |          |          |
|    | 70->73 | 0.39321  |        |        |        |          |          |
| 20 | 63->72 | -0.24222 | 8.1343 | 152.42 | 0.0049 | -1.2389  | -2.0483  |
|    | 65->72 | 0.47097  |        |        |        |          |          |
| 21 | 55->71 | 0.36848  | 8.1638 | 151.87 | 0.0213 | 23.439   | 23.7855  |
|    | 65->72 | -0.22999 |        |        |        |          |          |
| 22 | 68->73 | 0.30727  | 8.2249 | 150.74 | 0.0539 | -11.1963 | -10.9175 |
|    | 70->73 | 0.2498   |        |        |        |          |          |
|    | 70->74 | -0.23239 |        |        |        |          |          |
| 23 | 59->71 | 0.32393  | 8.2641 | 150.03 | 0.0121 | -6.592   | -8.0125  |
|    | 60->71 | -0.27085 |        |        |        |          |          |
|    | 61->71 | -0.23951 |        |        |        |          |          |
|    | 63->71 | 0.268    |        |        |        |          |          |
| 24 | 68->76 | -0.22953 | 8.3279 | 148.88 | 0.0024 | -7.6291  | -10.1568 |
|    | 70->74 | 0.31096  |        |        |        |          |          |
| 25 | 69->73 | 0.27723  | 8.3360 | 148.73 | 0.0124 | -5.822   | -5.5248  |
| 26 | 64->72 | -0.25394 | 8.3928 | 147.73 | 0.0402 | -7.8407  | -7.463   |
|    | 69->73 | 0.34757  |        |        |        |          |          |
| 27 | 69->74 | -0.25567 | 8.5173 | 145.57 | 0.0220 | 41.2282  | 42.1796  |
|    | 70->73 | 0.23519  |        |        |        |          |          |
|    | 70->74 | 0.40009  |        |        |        |          |          |
| 28 | 60->72 | -0.25986 | 8.6058 | 144.07 | 0.0014 | -1.6198  | -0.635   |
|    | 61->72 | 0.41958  |        |        |        |          |          |
|    | 62->72 | -0.28689 |        |        |        |          |          |
| 29 | 57->71 | 0.38179  | 8.6281 | 143.70 | 0.0097 | 2.0056   | 2.9663   |
|    | 58->71 | -0.23044 |        |        |        |          |          |
|    | 59->71 | 0.33221  |        |        |        |          |          |
| 30 | 58->71 | -0.23136 | 8.6830 | 142.79 | 0.0120 | -13.3353 | -13.1485 |
|    | 69->73 | 0.29713  |        |        |        |          |          |

|  |        |         |  |  |  |  |  |
|--|--------|---------|--|--|--|--|--|
|  | 69->74 | 0.29198 |  |  |  |  |  |
|--|--------|---------|--|--|--|--|--|

<sup>a</sup> Number of the excited states; <sup>b</sup> Only transitions with contribution over 10.0% were listed;

<sup>c</sup> Configuration-interaction coefficient; <sup>d</sup> Excitation energy; <sup>e</sup> Wavelength; <sup>f</sup> Oscillator strength; <sup>g</sup> Rotatory strength in length form (10<sup>-40</sup> cgs); <sup>h</sup> Rotatory strength in velocity form (10<sup>-40</sup> cgs).

**Table S17.** Key transitions, oscillator strengths, and rotatory strengths in the ECD spectrum of conformer (6*R*, 8*S*)-**3b** at the CAM-B3LYP-SCRF/def2-SVP level of theory in MeOH with SMD solvent model.

| Num <sup>a</sup> | Transition <sup>b</sup> | CI-coeff <sup>c</sup> | $\Delta E$ (eV) <sup>d</sup> | $\lambda$ (nm) <sup>e</sup> | f <sup>f</sup> | R <sub>vel</sub> <sup>g</sup> | R <sub>len</sub> <sup>h</sup> |
|------------------|-------------------------|-----------------------|------------------------------|-----------------------------|----------------|-------------------------------|-------------------------------|
| 1                | 69->71                  | -0.41855              | 5.0467                       | 245.67                      | 0.0296         | 0.2646                        | 0.3553                        |
|                  | 70->71                  | 0.43098               |                              |                             |                |                               |                               |
|                  | 70->72                  | -0.27637              |                              |                             |                |                               |                               |
| 2                | 69->71                  | 0.43274               | 5.4226                       | 228.64                      | 0.2497         | -60.9794                      | -67.127                       |
|                  | 70->71                  | 0.4644                |                              |                             |                |                               |                               |
| 3                | 66->71                  | 0.61484               | 5.4365                       | 228.06                      | 0.0243         | 53.6465                       | 58.5125                       |
| 4                | 69->71                  | -0.32452              | 6.3045                       | 196.66                      | 0.6436         | 17.7599                       | 18.9768                       |
|                  | 70->72                  | 0.60497               |                              |                             |                |                               |                               |
| 5                | 68->71                  | -0.2938               | 6.4609                       | 191.90                      | 0.3959         | -24.9539                      | -26.2527                      |
|                  | 69->72                  | 0.5735                |                              |                             |                |                               |                               |
|                  | 70->71                  | 0.23055               |                              |                             |                |                               |                               |
| 6                | 68->71                  | 0.6035                | 6.5137                       | 190.34                      | 0.1292         | 25.0142                       | 27.0251                       |
|                  | 69->72                  | 0.30267               |                              |                             |                |                               |                               |
| 7                | 67->71                  | 0.67672               | 6.8779                       | 180.26                      | 0.0023         | 3.7156                        | 3.8055                        |
| 8                | 68->72                  | 0.65208               | 7.0263                       | 176.46                      | 0.0082         | -14.3999                      | -14.0138                      |
| 9                | 64->71                  | 0.54871               | 7.0697                       | 175.37                      | 0.0532         | -15.4313                      | -17.6306                      |
|                  | 65->71                  | 0.37541               |                              |                             |                |                               |                               |
| 10               | 61->71                  | 0.39248               | 7.0937                       | 174.78                      | 0.0060         | 12.1006                       | 12.9672                       |
|                  | 62->71                  | 0.29134               |                              |                             |                |                               |                               |
|                  | 64->71                  | 0.27446               |                              |                             |                |                               |                               |
| 11               | 66->72                  | 0.45204               | 7.4099                       | 167.32                      | 0.0025         | -0.1743                       | -0.2826                       |
|                  | 67->72                  | -0.27328              |                              |                             |                |                               |                               |
| 12               | 61->71                  | 0.37219               | 7.4380                       | 166.69                      | 0.0058         | 2.1785                        | 2.4513                        |
|                  | 62->71                  | -0.23067              |                              |                             |                |                               |                               |
|                  | 66->72                  | -0.28386              |                              |                             |                |                               |                               |
|                  | 67->72                  | 0.22768               |                              |                             |                |                               |                               |
| 13               | 66->72                  | 0.3351                | 7.5867                       | 163.42                      | 0.0026         | -9.7028                       | -9.4881                       |
|                  | 67->72                  | 0.58716               |                              |                             |                |                               |                               |
| 14               | 62->71                  | 0.28071               | 7.6004                       | 163.13                      | 0.0031         | 1.2949                        | 0.6805                        |
|                  | 63->71                  | 0.2748                |                              |                             |                |                               |                               |
|                  | 65->71                  | 0.46891               |                              |                             |                |                               |                               |
| 15               | 62->71                  | -0.34356              | 7.7739                       | 159.49                      | 0.0017         | -2.6315                       | -2.6541                       |

|    |        |          |        |        |        |          |          |
|----|--------|----------|--------|--------|--------|----------|----------|
|    | 63->71 | 0.44368  |        |        |        |          |          |
| 16 | 61->72 | 0.27395  | 7.7870 | 159.22 | 0.0023 | 1.7129   | 1.563    |
|    | 62->72 | 0.34816  |        |        |        |          |          |
|    | 65->72 | -0.29708 |        |        |        |          |          |
|    |        |          |        |        |        |          |          |
| 17 | 60->71 | 0.53932  | 8.0196 | 154.60 | 0.0017 | -2.4198  | -1.5177  |
| 18 | 61->72 | 0.41879  | 8.1060 | 152.95 | 0.0100 | 3.9082   | 4.5183   |
|    | 65->72 | 0.3695   |        |        |        |          |          |
| 19 | 55->71 | 0.49084  | 8.1137 | 152.81 | 0.0008 | -1.004   | -1.2057  |
|    | 56->71 | 0.28854  |        |        |        |          |          |
|    | 65->72 | -0.24013 |        |        |        |          |          |
| 20 | 64->72 | 0.59309  | 8.1626 | 151.89 | 0.0117 | 6.4928   | 5.6228   |
|    | 65->72 | 0.24034  |        |        |        |          |          |
| 21 | 67->73 | -0.24343 | 8.2417 | 150.44 | 0.0529 | -59.3197 | -56.2769 |
|    | 70->73 | -0.22811 |        |        |        |          |          |
|    | 70->74 | 0.34933  |        |        |        |          |          |
| 22 | 67->73 | 0.34591  | 8.2551 | 150.19 | 0.0608 | 74.8317  | 77.6804  |
|    | 67->75 | -0.28007 |        |        |        |          |          |
|    | 70->74 | 0.30743  |        |        |        |          |          |
| 23 | 59->71 | 0.24199  | 8.3059 | 149.27 | 0.0388 | -0.3746  | -1.0344  |
|    | 69->74 | 0.44562  |        |        |        |          |          |
| 24 | 62->72 | 0.40231  | 8.3367 | 148.72 | 0.0222 | 12.0592  | 13.9527  |
|    | 64->72 | -0.24585 |        |        |        |          |          |
|    | 65->72 | 0.30838  |        |        |        |          |          |
| 25 | 59->71 | 0.4054   | 8.5077 | 145.73 | 0.0050 | -4.9561  | -6.0339  |
|    | 63->72 | 0.27091  |        |        |        |          |          |
|    | 70->74 | -0.27763 |        |        |        |          |          |
| 26 | 63->72 | 0.32611  | 8.5557 | 144.91 | 0.0335 | -3.6948  | -7.8564  |
|    | 70->73 | -0.29217 |        |        |        |          |          |
| 27 | 63->72 | 0.36503  | 8.5666 | 144.73 | 0.0049 | 4.466    | 2.6958   |
|    | 70->73 | 0.3251   |        |        |        |          |          |
| 28 | 60->72 | 0.34602  | 8.7012 | 142.49 | 0.0073 | 20.3501  | 19.1933  |
|    | 68->73 | 0.2789   |        |        |        |          |          |
|    | 70->73 | 0.28478  |        |        |        |          |          |
| 29 | 60->72 | 0.44742  | 8.7135 | 142.29 | 0.0029 | 9.4203   | 10.0493  |
| 30 | 69->73 | 0.44984  | 8.7714 | 141.35 | 0.0029 | -6.1589  | -6.5222  |
|    | 69->74 | 0.22976  |        |        |        |          |          |
|    | 69->77 | -0.24903 |        |        |        |          |          |

<sup>a</sup> Number of the excited states; <sup>b</sup> Only transitions with contribution over 10.0% were listed;

<sup>c</sup> Configuration-interaction coefficient; <sup>d</sup> Excitation energy; <sup>e</sup> Wavelength; <sup>f</sup> Oscillator strength; <sup>g</sup> Rotatory strength in length form ( $10^{-40}$  cgs); <sup>h</sup> Rotatory strength in velocity form ( $10^{-40}$  cgs).

**Table S18.** Key transitions, oscillator strengths, and rotatory strengths in the ECD spectrum of conformer (6*R*, 8*S*)-**3c** at the CAM-B3LYP-SCRF/def2-SVP level of theory in MeOH with SMD solvent model.

| Num <sup>a</sup> | Transition <sup>b</sup> | CI-coeff <sup>c</sup> | $\Delta E$ (eV) <sup>d</sup> | $\lambda$ (nm) <sup>e</sup> | $f^f$  | $R_{\text{vel}}^g$ | $R_{\text{len}}^h$ |
|------------------|-------------------------|-----------------------|------------------------------|-----------------------------|--------|--------------------|--------------------|
| 1                | 69->71                  | 0.42815               | 5.0428                       | 245.86                      | 0.0325 | -0.4427            | -0.4652            |
|                  | 69->72                  | 0.20567               |                              |                             |        |                    |                    |
|                  | 70->71                  | -0.42557              |                              |                             |        |                    |                    |
|                  | 70->72                  | 0.28083               |                              |                             |        |                    |                    |
| 2                | 66->71                  | -0.31584              | 5.4085                       | 229.24                      | 0.2035 | 83.7814            | 91.2555            |
|                  | 69->71                  | 0.3821                |                              |                             |        |                    |                    |
|                  | 70->71                  | 0.43256               |                              |                             |        |                    |                    |
| 3                | 66->71                  | 0.54428               | 5.4281                       | 228.41                      | 0.0709 | -81.2281           | -89.0265           |
|                  | 69->71                  | 0.21218               |                              |                             |        |                    |                    |
|                  | 70->71                  | 0.25299               |                              |                             |        |                    |                    |
| 4                | 69->71                  | -0.3342               | 6.3137                       | 196.37                      | 0.6485 | -23.8378           | -24.072            |
|                  | 70->72                  | 0.60362               |                              |                             |        |                    |                    |
| 5                | 69->72                  | 0.62063               | 6.4806                       | 191.32                      | 0.4455 | -11.5842           | -12.3602           |
|                  | 70->71                  | 0.22351               |                              |                             |        |                    |                    |
| 6                | 68->71                  | 0.63027               | 6.5415                       | 189.53                      | 0.0867 | 18.1484            | 21.979             |
| 7                | 67->71                  | 0.64502               | 6.9109                       | 179.40                      | 0.0009 | -1.1864            | -0.6974            |
| 8                | 62->71                  | -0.40152              | 7.0299                       | 176.37                      | 0.0202 | -22.9871           | -25.8493           |
|                  | 64->71                  | 0.41371               |                              |                             |        |                    |                    |
|                  | 65->71                  | 0.24258               |                              |                             |        |                    |                    |
| 9                | 62->71                  | 0.23821               | 7.0785                       | 175.16                      | 0.0364 | 12.3851            | 15.7323            |
|                  | 65->71                  | 0.61076               |                              |                             |        |                    |                    |
| 10               | 68->72                  | 0.61731               | 7.1501                       | 173.40                      | 0.0062 | 10.3936            | 9.4088             |
| 11               | 61->71                  | 0.27997               | 7.2835                       | 170.23                      | 0.0045 | -6.8935            | -7.8544            |
|                  | 62->71                  | 0.26464               |                              |                             |        |                    |                    |
|                  | 63->71                  | 0.28515               |                              |                             |        |                    |                    |
|                  | 64->71                  | 0.34704               |                              |                             |        |                    |                    |
| 12               | 66->72                  | 0.41591               | 7.3892                       | 167.79                      | 0.0042 | -5.2773            | -4.2441            |
|                  | 67->72                  | 0.43262               |                              |                             |        |                    |                    |
|                  | 68->72                  | 0.286                 |                              |                             |        |                    |                    |
| 13               | 66->72                  | -0.39821              | 7.5656                       | 163.88                      | 0.0045 | -6.7171            | -7.8926            |
|                  | 67->72                  | 0.48947               |                              |                             |        |                    |                    |
| 14               | 61->71                  | 0.39271               | 7.6529                       | 162.01                      | 0.0047 | 7.44               | 7.1019             |
|                  | 63->71                  | 0.22174               |                              |                             |        |                    |                    |
|                  | 64->71                  | -0.36477              |                              |                             |        |                    |                    |
| 15               | 61->72                  | 0.2007                | 7.7474                       | 160.03                      | 0.0041 | -4.5856            | -4.2964            |
|                  | 62->72                  | -0.3797               |                              |                             |        |                    |                    |
|                  | 64->72                  | 0.42838               |                              |                             |        |                    |                    |

|    |        |          |        |        |        |         |         |
|----|--------|----------|--------|--------|--------|---------|---------|
| 16 | 61->71 | -0.30896 | 7.7894 | 159.17 | 0.0005 | -0.9116 | -1.2698 |
|    | 63->71 | 0.53598  |        |        |        |         |         |
| 17 | 55->71 | 0.34307  | 8.0368 | 154.27 | 0.0012 | -0.0958 | -0.1303 |
|    | 62->72 | 0.26616  |        |        |        |         |         |
|    | 63->72 | 0.23946  |        |        |        |         |         |
| 18 | 67->73 | 0.37678  | 8.0494 | 154.03 | 0.0010 | -3.9039 | -2.3557 |
|    | 68->73 | -0.35026 |        |        |        |         |         |
| 19 | 55->71 | 0.29966  | 8.0825 | 153.40 | 0.0062 | -1.6125 | -1.4246 |
|    | 60->71 | -0.23656 |        |        |        |         |         |
|    | 63->72 | -0.24716 |        |        |        |         |         |
| 20 | 55->71 | 0.30905  | 8.1543 | 152.05 | 0.0044 | -1.6597 | -3.3307 |
|    | 59->71 | 0.25947  |        |        |        |         |         |
|    | 60->71 | 0.2471   |        |        |        |         |         |
|    | 65->72 | 0.37302  |        |        |        |         |         |
| 21 | 55->71 | -0.23771 | 8.1677 | 151.80 | 0.0075 | 2.2573  | 3.5092  |
|    | 65->72 | 0.51578  |        |        |        |         |         |
| 22 | 69->74 | -0.20721 | 8.2227 | 150.78 | 0.1112 | -9.1812 | -9.8108 |
|    | 70->73 | -0.26019 |        |        |        |         |         |
|    | 70->74 | 0.48171  |        |        |        |         |         |
| 23 | 62->72 | -0.26821 | 8.3318 | 148.81 | 0.0097 | 24.7542 | 19.1059 |
|    | 63->72 | 0.38155  |        |        |        |         |         |
|    | 64->72 | -0.34043 |        |        |        |         |         |
| 24 | 69->73 | -0.22045 | 8.3569 | 148.36 | 0.0358 | -8.9503 | -8.5993 |
|    | 69->74 | 0.46665  |        |        |        |         |         |
| 25 | 59->71 | 0.40006  | 8.4355 | 146.98 | 0.0091 | 24.91   | 19.4661 |
|    | 60->71 | -0.33932 |        |        |        |         |         |
|    | 61->71 | -0.20401 |        |        |        |         |         |
| 26 | 60->71 | -0.20414 | 8.4793 | 146.22 | 0.0085 | 9.9069  | 5.404   |
|    | 68->76 | 0.20869  |        |        |        |         |         |
| 27 | 61->72 | 0.51211  | 8.5515 | 144.98 | 0.0333 | 7.8379  | 8.4721  |
|    | 63->72 | -0.22241 |        |        |        |         |         |
|    | 64->72 | -0.23127 |        |        |        |         |         |
| 28 | 70->73 | 0.51745  | 8.6036 | 144.11 | 0.0016 | -2.2021 | -5.4535 |
|    | 70->74 | 0.30794  |        |        |        |         |         |
| 29 | 56->71 | 0.34684  | 8.6491 | 143.35 | 0.0014 | -1.3322 | -0.6764 |
|    | 58->71 | -0.34067 |        |        |        |         |         |
|    | 60->71 | -0.21067 |        |        |        |         |         |
| 30 | 56->71 | -0.26967 | 8.7467 | 141.75 | 0.0020 | -5.576  | -6.7973 |
|    | 57->71 | 0.37533  |        |        |        |         |         |
|    | 58->71 | -0.32832 |        |        |        |         |         |

<sup>a</sup> Number of the excited states; <sup>b</sup> Only transitions with contribution over 10.0% were listed;  
<sup>c</sup> Configuration-interaction coefficient; <sup>d</sup> Excitation energy; <sup>e</sup> Wavelength; <sup>f</sup> Oscillator strength; <sup>g</sup> Rotatory strength in length form (10<sup>-40</sup> cgs); <sup>h</sup> Rotatory strength in velocity form (10<sup>-40</sup> cgs).

**Table S19.** Key transitions, oscillator strengths, and rotatory strengths in the ECD spectrum of conformer (6*R*, 8*S*)-**3d** at the CAM-B3LYP-SCRF/def2-SVP level of theory in MeOH with SMD solvent model.

| Num <sup>a</sup> | Transition <sup>b</sup> | CI-coeff <sup>c</sup> | ΔE (eV) <sup>d</sup> | λ (nm) <sup>e</sup> | f <sup>f</sup> | R <sub>vel</sub> <sup>g</sup> | R <sub>len</sub> <sup>h</sup> |
|------------------|-------------------------|-----------------------|----------------------|---------------------|----------------|-------------------------------|-------------------------------|
| 1                | 69->71                  | 0.472                 | 5.0570               | 245.17              | 0.0261         | 0.5075                        | 0.5862                        |
|                  | 70->71                  | -0.35861              |                      |                     |                |                               |                               |
|                  | 70->72                  | 0.30922               |                      |                     |                |                               |                               |
| 2                | 69->71                  | 0.37239               | 5.4100               | 229.17              | 0.2738         | -41.4755                      | -45.4942                      |
|                  | 70->71                  | 0.54159               |                      |                     |                |                               |                               |
| 3                | 66->71                  | 0.63761               | 5.4342               | 228.15              | 0.0084         | 32.9081                       | 35.7356                       |
| 4                | 69->71                  | -0.34535              | 6.2940               | 196.99              | 0.5942         | -11.5093                      | -11.3683                      |
|                  | 70->72                  | 0.595                 |                      |                     |                |                               |                               |
| 5                | 68->71                  | 0.47359               | 6.4364               | 192.63              | 0.2451         | 61.715                        | 63.7798                       |
|                  | 69->72                  | -0.4601               |                      |                     |                |                               |                               |
| 6                | 68->71                  | 0.47956               | 6.4810               | 191.31              | 0.2977         | -14.7023                      | -14.2133                      |
|                  | 69->72                  | 0.46269               |                      |                     |                |                               |                               |
| 7                | 67->71                  | 0.66619               | 6.8417               | 181.22              | 0.0105         | -2.1477                       | -2.1827                       |
| 8                | 60->71                  | 0.23858               | 7.0286               | 176.40              | 0.0007         | 1.2556                        | 1.0696                        |
|                  | 63->71                  | 0.39237               |                      |                     |                |                               |                               |
|                  | 64->71                  | 0.23135               |                      |                     |                |                               |                               |
|                  | 65->71                  | -0.25501              |                      |                     |                |                               |                               |
| 9                | 64->71                  | 0.51995               | 7.0649               | 175.49              | 0.0576         | -4.6988                       | -6.7097                       |
|                  | 65->71                  | 0.44609               |                      |                     |                |                               |                               |
| 10               | 68->72                  | 0.685                 | 7.1412               | 173.62              | 0.0053         | -1.1645                       | -1.7993                       |
| 11               | 66->72                  | 0.5941                | 7.3182               | 169.42              | 0.0042         | 3.1668                        | 3.5923                        |
| 12               | 61->71                  | -0.22424              | 7.3811               | 167.98              | 0.0050         | 9.6959                        | 10.153                        |
|                  | 62->71                  | 0.3311                |                      |                     |                |                               |                               |
|                  | 63->71                  | -0.2665               |                      |                     |                |                               |                               |
|                  | 64->71                  | 0.24916               |                      |                     |                |                               |                               |
|                  | 65->71                  | -0.29431              |                      |                     |                |                               |                               |
| 13               | 67->72                  | 0.66326               | 7.4170               | 167.16              | 0.0218         | -36.6543                      | -38.1341                      |
| 14               | 61->71                  | 0.41107               | 7.6684               | 161.68              | 0.0072         | -2.2906                       | -1.8543                       |
|                  | 62->71                  | -0.25484              |                      |                     |                |                               |                               |
|                  | 65->71                  | -0.29022              |                      |                     |                |                               |                               |
| 15               | 60->72                  | 0.23017               | 7.8177               | 158.59              | 0.0037         | 2.854                         | 2.6955                        |
|                  | 62->72                  | -0.24938              |                      |                     |                |                               |                               |
|                  | 63->72                  | 0.38795               |                      |                     |                |                               |                               |

|    |        |          |        |        |        |          |          |
|----|--------|----------|--------|--------|--------|----------|----------|
|    | 64->72 | 0.22522  |        |        |        |          |          |
|    | 66->72 | -0.24995 |        |        |        |          |          |
| 16 | 58->71 | -0.24014 | 7.9513 | 155.93 | 0.0013 | 1.9305   | 2.2085   |
|    | 59->71 | 0.2442   |        |        |        |          |          |
|    | 60->71 | 0.47071  |        |        |        |          |          |
| 17 | 61->71 | 0.29848  | 7.9796 | 155.38 | 0.0136 | 12.2161  | 11.6904  |
|    | 62->71 | 0.39364  |        |        |        |          |          |
|    | 63->71 | 0.28185  |        |        |        |          |          |
| 18 | 62->72 | -0.24291 | 8.0216 | 154.56 | 0.0083 | 6.982    | 8.3893   |
|    | 65->72 | 0.49985  |        |        |        |          |          |
| 19 | 56->71 | 0.52914  | 8.1173 | 152.74 | 0.0030 | -2.3438  | -1.5855  |
| 20 | 64->72 | 0.40151  | 8.1492 | 152.14 | 0.0323 | 13.0949  | 14.995   |
|    | 70->73 | -0.3579  |        |        |        |          |          |
| 21 | 64->72 | 0.36104  | 8.2059 | 151.09 | 0.0204 | -13.2469 | -18.1305 |
|    | 70->73 | 0.33937  |        |        |        |          |          |
| 22 | 69->73 | 0.31155  | 8.3215 | 148.99 | 0.0266 | 10.6662  | 10.0859  |
|    | 69->74 | -0.27426 |        |        |        |          |          |
|    | 70->74 | -0.28258 |        |        |        |          |          |
| 23 | 61->72 | 0.32159  | 8.3462 | 148.55 | 0.0347 | -25.1359 | -21.0188 |
|    | 70->74 | 0.29251  |        |        |        |          |          |
| 24 | 61->72 | 0.27308  | 8.4126 | 147.38 | 0.0627 | -28.9498 | -24.1861 |
|    | 69->74 | 0.33344  |        |        |        |          |          |
| 25 | 70->73 | 0.3168   | 8.5746 | 144.60 | 0.0092 | 2.4853   | 7.0256   |
|    | 70->74 | 0.31698  |        |        |        |          |          |
| 26 | 60->72 | 0.40447  | 8.6026 | 144.12 | 0.0032 | -14.4041 | -12.7825 |
|    | 63->72 | -0.36966 |        |        |        |          |          |
| 27 | 57->71 | 0.34934  | 8.6420 | 143.47 | 0.0030 | 5.2427   | 5.6081   |
|    | 59->71 | -0.34894 |        |        |        |          |          |
|    | 60->71 | 0.26455  |        |        |        |          |          |
| 28 | 57->71 | 0.37533  | 8.6693 | 143.02 | 0.0069 | 7.0897   | 7.4244   |
|    | 59->71 | 0.33536  |        |        |        |          |          |
|    | 61->71 | -0.22746 |        |        |        |          |          |
| 29 | 69->74 | 0.26964  | 8.6922 | 142.64 | 0.0070 | -6.6008  | -0.3352  |
| 30 | 61->72 | 0.32167  | 8.7145 | 142.27 | 0.0064 | 10.058   | 10.337   |
|    | 62->72 | 0.40866  |        |        |        |          |          |
|    | 63->72 | 0.22382  |        |        |        |          |          |

<sup>a</sup> Number of the excited states; <sup>b</sup> Only transitions with contribution over 10.0% were listed;

<sup>c</sup> Configuration-interaction coefficient; <sup>d</sup> Excitation energy; <sup>e</sup> Wavelength; <sup>f</sup> Oscillator strength; <sup>g</sup>

Rotatory strength in length form ( $10^{-40}$  cgs); <sup>h</sup> Rotatory strength in velocity form ( $10^{-40}$  cgs).

**Table S20.** Crystal data and structure refinement for arthrinin E (1).

|                                             |                                                               |
|---------------------------------------------|---------------------------------------------------------------|
| Identification code                         | arthrinin E                                                   |
| Empirical formula                           | C <sub>15</sub> H <sub>26</sub> O <sub>3</sub>                |
| Formula weight                              | 254.36                                                        |
| Temperature/K                               | 100.(2)                                                       |
| Crystal system                              | trigonal                                                      |
| Space group                                 | P3 <sub>2</sub> 21                                            |
| a/Å                                         | 8.8861(2)                                                     |
| b/Å                                         | 8.8861(2)                                                     |
| c/Å                                         | 31.7909(6)                                                    |
| α/°                                         | 90                                                            |
| β/°                                         | 90                                                            |
| γ/°                                         | 120                                                           |
| Volume/Å <sup>3</sup>                       | 2173.98(11)                                                   |
| Z                                           | 6                                                             |
| ρ <sub>calc</sub> /cm <sup>3</sup>          | 1.166                                                         |
| μ/mm <sup>-1</sup>                          | 0.629                                                         |
| F(000)                                      | 840.0                                                         |
| Crystal size/mm <sup>3</sup>                | 0.260 × 0.250 × 0.250                                         |
| Radiation                                   | Cu Kα (λ = 1.54178)                                           |
| 2θ range for data collection/°              | 8.34 to 144.68                                                |
| Index ranges                                | -10 ≤ h ≤ 10, -10 ≤ k ≤ 10, -39 ≤ l ≤ 39                      |
| Reflections collected                       | 29180                                                         |
| Independent reflections                     | 2838 [R <sub>int</sub> = 0.0291, R <sub>sigma</sub> = 0.0139] |
| Data/restraints/parameters                  | 2838/0/170                                                    |
| Goodness-of-fit on F <sup>2</sup>           | 1.142                                                         |
| Final R indexes [I >= 2σ (I)]               | R <sub>1</sub> = 0.0351, wR <sub>2</sub> = 0.0969             |
| Final R indexes [all data]                  | R <sub>1</sub> = 0.0353, wR <sub>2</sub> = 0.0970             |
| Largest diff. peak/hole / e Å <sup>-3</sup> | 0.22/-0.32                                                    |
| Flack parameter                             | 0.07(3)                                                       |



**Table S21.** Fractional Atomic Coordinates ( $\times 10^4$ ) and Equivalent Isotropic Displacement Parameters ( $\text{\AA}^2 \times 10^3$ ) for arthrinin E.  $U_{\text{eq}}$  is defined as 1/3 of the trace of the orthogonalised  $U_{\text{ij}}$  tensor.

| Atom | x           | y       | z         | U(eq)   |
|------|-------------|---------|-----------|---------|
| O1   | 6545.6(19)  | 6731(2) | 5430.8(4) | 23.9(3) |
| O2   | 14193.3(19) | 6748(2) | 5991.6(5) | 31.3(4) |
| O3   | 7346(2)     | 1691(2) | 6575.7(5) | 36.1(4) |
| C1   | 10585(3)    | 9610(3) | 5519.6(7) | 27.1(4) |
| C2   | 10158(2)    | 8129(2) | 5826.4(5) | 18.1(4) |
| C3   | 8965(2)     | 6311(2) | 5637.5(5) | 14.6(4) |
| C4   | 7012(2)     | 5605(2) | 5646.8(5) | 16.3(4) |
| C5   | 6125(3)     | 3795(3) | 5459.1(6) | 21.2(4) |
| C6   | 6454(2)     | 2531(2) | 5717.5(6) | 19.6(4) |
| C7   | 6233(3)     | 1039(3) | 5432.5(7) | 31.1(5) |
| C8   | 11798(2)    | 8027(3) | 5927.3(6) | 20.2(4) |
| C9   | 11208(2)    | 6158(2) | 6081.2(5) | 17.3(4) |
| C10  | 11236(3)    | 6067(3) | 6567.3(6) | 23.0(4) |
| C11  | 12412(2)    | 5558(3) | 5893.6(6) | 21.9(4) |
| C12  | 9374(2)     | 5094(2) | 5890.5(5) | 14.5(4) |
| C13  | 8216(2)     | 3404(2) | 5937.8(5) | 17.2(4) |
| C14  | 8496(3)     | 2208(3) | 6223.9(6) | 22.7(4) |
| C15  | 9365(3)     | 8423(3) | 6224.8(6) | 24.7(4) |

**Table S22.** Anisotropic Displacement Parameters ( $\text{\AA}^2 \times 10^3$ ) for arthrinin E. The Anisotropic displacement factor exponent takes the form:  $-2\pi^2[h^2a^2U_{11}+2hka*b*U_{12}+\dots]$ .

| Atom | U <sub>11</sub> | U <sub>22</sub> | U <sub>33</sub> | U <sub>12</sub> | U <sub>13</sub> | U <sub>23</sub> |
|------|-----------------|-----------------|-----------------|-----------------|-----------------|-----------------|
| O1   | 28.7(8)         | 29.3(8)         | 22.2(7)         | 20.9(6)         | -4.9(6)         | 2.5(6)          |
| O2   | 15.1(7)         | 37.5(9)         | 43.5(9)         | 14.7(7)         | 4.0(6)          | 4.9(7)          |
| O3   | 37.6(9)         | 51.7(11)        | 27.3(8)         | 28.5(8)         | 12.2(7)         | 20.0(7)         |
| C1   | 30.9(11)        | 19.0(9)         | 30.8(10)        | 12.1(9)         | 2.0(8)          | 7.1(8)          |
| C2   | 20.2(9)         | 15.5(9)         | 18.4(8)         | 8.7(7)          | 0.0(7)          | 0.9(7)          |
| C3   | 17.6(9)         | 16.6(8)         | 11.7(7)         | 10.2(7)         | 1.7(6)          | 1.8(7)          |
| C4   | 18.4(9)         | 21.1(9)         | 13.7(7)         | 13.1(7)         | 0.4(6)          | 3.2(6)          |
| C5   | 19.2(9)         | 22.5(10)        | 19.7(8)         | 8.8(8)          | -3.6(7)         | -0.9(7)         |
| C6   | 18.6(9)         | 16.9(9)         | 20.9(8)         | 7.0(8)          | 4.0(7)          | 1.0(7)          |
| C7   | 32.5(11)        | 20.2(10)        | 34.2(11)        | 8.4(9)          | 3.1(9)          | -5.7(8)         |

|     |          |          |         |         |         |         |
|-----|----------|----------|---------|---------|---------|---------|
| C8  | 16.7(9)  | 20.4(9)  | 20.7(9) | 7.2(8)  | 0.1(7)  | 1.8(7)  |
| C9  | 16.1(9)  | 22.0(9)  | 15.3(8) | 10.7(7) | 0.4(6)  | 2.3(7)  |
| C10 | 21.7(9)  | 34.0(11) | 16.4(8) | 16.2(8) | 0.0(7)  | 2.8(7)  |
| C11 | 18.8(9)  | 29.2(10) | 21.0(9) | 14.5(9) | 1.6(7)  | 2.2(8)  |
| C12 | 15.6(8)  | 19.8(9)  | 12.3(7) | 11.9(7) | 2.1(6)  | 1.2(6)  |
| C13 | 19.7(9)  | 19.4(9)  | 16.7(8) | 13.0(8) | 3.1(7)  | 1.3(7)  |
| C14 | 28.0(10) | 20.0(9)  | 25.2(9) | 15.7(8) | 6.9(8)  | 6.5(7)  |
| C15 | 31.3(11) | 24.9(10) | 22.1(9) | 17.1(9) | -0.3(8) | -5.7(8) |

**Table S23.** Bond Lengths for arthrinin E.

| Atom | Atom | Length/Å | Atom | Atom | Length/Å |
|------|------|----------|------|------|----------|
| O1   | C4   | 1.434(2) | C5   | C6   | 1.533(3) |
| O2   | C11  | 1.431(2) | C6   | C13  | 1.526(3) |
| O3   | C14  | 1.427(2) | C6   | C7   | 1.535(3) |
| C1   | C2   | 1.526(3) | C8   | C9   | 1.550(3) |
| C2   | C15  | 1.534(3) | C9   | C11  | 1.535(3) |
| C2   | C8   | 1.538(3) | C9   | C12  | 1.541(3) |
| C2   | C3   | 1.544(3) | C9   | C10  | 1.549(2) |
| C3   | C4   | 1.522(2) | C12  | C13  | 1.338(3) |
| C3   | C12  | 1.531(2) | C13  | C14  | 1.512(3) |
| C4   | C5   | 1.516(3) |      |      |          |

**Table S24.** Bond Angles for arthrinin E.

| Atom | Atom | Atom | Angle/°    | Atom | Atom | Atom | Angle/°    |
|------|------|------|------------|------|------|------|------------|
| C1   | C2   | C15  | 108.55(16) | C2   | C8   | C9   | 107.80(15) |
| C1   | C2   | C8   | 110.49(16) | C11  | C9   | C12  | 109.92(15) |
| C15  | C2   | C8   | 111.56(15) | C11  | C9   | C10  | 109.69(15) |
| C1   | C2   | C3   | 113.48(15) | C12  | C9   | C10  | 113.60(15) |
| C15  | C2   | C3   | 111.45(16) | C11  | C9   | C8   | 109.18(15) |
| C8   | C2   | C3   | 101.24(14) | C12  | C9   | C8   | 102.79(14) |
| C4   | C3   | C12  | 108.90(15) | C10  | C9   | C8   | 111.43(16) |
| C4   | C3   | C2   | 117.94(14) | O2   | C11  | C9   | 111.38(17) |
| C12  | C3   | C2   | 104.67(14) | C13  | C12  | C3   | 122.01(17) |
| O1   | C4   | C5   | 111.95(15) | C13  | C12  | C9   | 128.96(16) |
| O1   | C4   | C3   | 111.77(15) | C3   | C12  | C9   | 108.97(15) |

|     |    |    |            |     |     |     |            |
|-----|----|----|------------|-----|-----|-----|------------|
| C5  | C4 | C3 | 108.03(15) | C12 | C13 | C14 | 123.49(17) |
| C4  | C5 | C6 | 112.25(14) | C12 | C13 | C6  | 122.51(16) |
| C13 | C6 | C5 | 113.33(15) | C14 | C13 | C6  | 113.97(16) |
| C13 | C6 | C7 | 111.47(16) | O3  | C14 | C13 | 110.76(16) |
| C5  | C6 | C7 | 109.13(16) |     |     |     |            |

**Table S25.** Hydrogen Bonds for arthrinin E.

| D  | H   | A               | d(D-H)/Å | d(H-A)/Å | d(D-A)/Å | D-H-A/° |
|----|-----|-----------------|----------|----------|----------|---------|
| O1 | H24 | O1 <sup>1</sup> | 0.84     | 1.92     | 2.754(3) | 171.0   |
| O2 | H25 | O1 <sup>2</sup> | 0.84     | 1.92     | 2.753(2) | 170.6   |
| O3 | H26 | O2 <sup>3</sup> | 0.84     | 2.05     | 2.782(2) | 145.0   |

<sup>1</sup>+Y,+X,1-Z; <sup>2</sup>1+X,+Y,+Z; <sup>3</sup>-Y+X,1-Y,4/3-Z

**Table S26.** Torsion Angles for arthrinin E.

| A   | B  | C  | D   | Angle/°     | A   | B   | C   | D   | Angle/°     |
|-----|----|----|-----|-------------|-----|-----|-----|-----|-------------|
| C1  | C2 | C3 | C4  | -84.4(2)    | C8  | C9  | C11 | O2  | 55.37(19)   |
| C15 | C2 | C3 | C4  | 38.5(2)     | C4  | C3  | C12 | C13 | 27.0(2)     |
| C8  | C2 | C3 | C4  | 157.21(15)  | C2  | C3  | C12 | C13 | 153.94(16)  |
| C1  | C2 | C3 | C12 | 154.39(16)  | C4  | C3  | C12 | C9  | -150.32(14) |
| C15 | C2 | C3 | C12 | -82.71(18)  | C2  | C3  | C12 | C9  | -23.33(18)  |
| C8  | C2 | C3 | C12 | 36.01(17)   | C11 | C9  | C12 | C13 | 67.4(2)     |
| C12 | C3 | C4 | O1  | 177.34(14)  | C10 | C9  | C12 | C13 | -56.0(2)    |
| C2  | C3 | C4 | O1  | 58.3(2)     | C8  | C9  | C12 | C13 | -176.49(18) |
| C12 | C3 | C4 | C5  | -59.07(17)  | C11 | C9  | C12 | C3  | -115.60(16) |
| C2  | C3 | C4 | C5  | -178.06(14) | C10 | C9  | C12 | C3  | 121.07(17)  |
| O1  | C4 | C5 | C6  | -173.61(15) | C8  | C9  | C12 | C3  | 0.54(17)    |
| C3  | C4 | C5 | C6  | 62.90(19)   | C3  | C12 | C13 | C14 | -172.95(16) |
| C4  | C5 | C6 | C13 | -31.2(2)    | C9  | C12 | C13 | C14 | 3.7(3)      |
| C4  | C5 | C6 | C7  | -156.04(17) | C3  | C12 | C13 | C6  | 4.7(3)      |
| C1  | C2 | C8 | C9  | -157.51(15) | C9  | C12 | C13 | C6  | -178.58(16) |
| C15 | C2 | C8 | C9  | 81.65(19)   | C5  | C6  | C13 | C12 | -2.9(2)     |
| C3  | C2 | C8 | C9  | -36.99(17)  | C7  | C6  | C13 | C12 | 120.7(2)    |
| C2  | C8 | C9 | C11 | 139.58(15)  | C5  | C6  | C13 | C14 | 174.97(15)  |
| C2  | C8 | C9 | C12 | 22.91(17)   | C7  | C6  | C13 | C14 | -61.5(2)    |
| C2  | C8 | C9 | C10 | -99.10(17)  | C12 | C13 | C14 | O3  | 110.9(2)    |

|     |    |     |    |            |    |     |     |    |          |
|-----|----|-----|----|------------|----|-----|-----|----|----------|
| C12 | C9 | C11 | O2 | 167.41(15) | C6 | C13 | C14 | O3 | -66.9(2) |
| C10 | C9 | C11 | O2 | -67.0(2)   |    |     |     |    |          |

**Table S27.** Hydrogen Atom Coordinates ( $\text{\AA}\times 10^4$ ) and Isotropic Displacement Parameters ( $\text{\AA}^2\times 10^3$ ) for arthrinin E.

| Atom | <i>x</i> | <i>y</i> | <i>z</i> | U(eq) |
|------|----------|----------|----------|-------|
| H24  | 6521.69  | 6557.63  | 5170.52  | 36    |
| H25  | 14835.98 | 6618.91  | 5819.02  | 47    |
| H26  | 7830.9   | 2391.22  | 6774.94  | 54    |
| H1   | 11470.88 | 10709.99 | 5643.21  | 41    |
| H8   | 9532.19  | 9669.04  | 5462.2   | 41    |
| H7   | 11025.38 | 9401.18  | 5256.41  | 41    |
| H21  | 9321.85  | 6315.12  | 5339     | 18    |
| H6   | 6639.8   | 5514.3   | 5946.99  | 20    |
| H5   | 6556.44  | 3854.34  | 5168.94  | 25    |
| H4   | 4858.82  | 3348.31  | 5443.57  | 25    |
| H22  | 5537.65  | 2019.46  | 5939.95  | 24    |
| H3   | 7195.97  | 1476.98  | 5231.12  | 47    |
| H23  | 5130.74  | 563.78   | 5279.73  | 47    |
| H2   | 6231.94  | 123.91   | 5604.84  | 47    |
| H9   | 12486.91 | 8879.78  | 6148.7   | 24    |
| H17  | 12531.04 | 8294.16  | 5672.89  | 24    |
| H11  | 10267.54 | 6166     | 6683.47  | 35    |
| H10  | 12336.49 | 7022.47  | 6673.35  | 35    |
| H12  | 11122.17 | 4955.15  | 6652.82  | 35    |
| H13  | 12085.84 | 4394.73  | 6005.96  | 26    |
| H14  | 12263.32 | 5458.32  | 5584.37  | 26    |
| H15  | 8292.73  | 1164.91  | 6064.62  | 27    |
| H16  | 9713.36  | 2810.3   | 6324.48  | 27    |
| H20  | 10222.8  | 9505.78  | 6360.82  | 37    |
| H18  | 9027.5   | 7449.16  | 6418.94  | 37    |
| H19  | 8337.55  | 8502.06  | 6149.04  | 37    |
